# Supplementary material for: Structure and physiological function of the human KCNQ1 channel voltage sensor intermediate state
Source: eLife. 2020 Feb 25;9:e53901. doi: 10.7554/eLife.53901 (PMC7069725; doi:10.7554/eLife.53901)
Supplement: Figure 1—figure supplement 1—source data 1. [file elife-53901-fig1-figsupp1-data1.xlsx]

## Sheet: Sheet1
Fig_1_fig supp_1
Panel A		Panel B		Panel C		Panel D		Panel E		Panel F		Panel G		Panel H
144-SL		155-SL		214-SL		224-SL		121-SL		177-SL		180-SL		238-SL
Residue	Ipara/Idia	Residue	Ipara/Idia	Residue	Ipara/Idia	Residue	Ipara/Idia	121-Sl	Ipara/Idia	Residue	Ipara/Idia	Residue	Ipara/Idia	Residue	Ipara/Idia
100	0.19624	100	0.149918	100	0.304553	100	0.757813	100	0.566917	100	0.496129	100	0.783796	100	0.651687
101	0.126402	101	0.188606	101	0.149139	101	0.615032	101	0.604112	101	0.392154	101		101	0.520378
102	0.489859	102	0.319978	102	0.414072	102	0.831788	102	0.461012	102	0.44269	102	1.26753	102	0.69085
103	0.849152	103	0.545709	103	0.653278	103	1.08633	103	0.444171	103	0.538846	103		103	0.769577
104	0.845633	104	0.669338	104	0.648748	104	0.948885	104	0.633975	104	0.694603	104	0.84519	104	0.816079
105	0.775299	105	0.543015	105	0.473352	105	0.853655	105	0.319618	105	0.257215	105	0.732785	105	0.620062
106	0.798756	106	0.671516	106	0.667732	106	0.901204	106	0.394441	106	0.563404	106	0.787721	106	0.738513
107	0.90345	107	0.469332	107	0.366268	107	0.795319	107	0.0971976	107	0.122638	107	0.696542	107	0.575825
108	0.975649	108	0.948482	108	0.925113	108	0.980799	108		108	0.727547	108	0.879703	108	0.853644
109	0.965947	109	1.08628	109	0.665519	109	0.934921	109	0.154476	109		109		109	0.802729
110	0.948193	110	0.936759	110	0.760384	110	0.918338	110	0.256336	110	0.41472	110	0.730205	110	0.693323
111	0.986549	111	0.965935	111	0.830137	111	0.960287	111	0.0751164	111	0.33601	111	0.629116	111
112	0.990937	112	1.02548	112	0.973021	112	0.985154	112	0.0424337	112	0.434309	112	0.877768	112	0.897809
113	1.01233	113	0.811768	113	0.74643	113	0.893705	113	0.096947	113	0.36731	113	0.625527	113	0.700407
114	1.0179	114	1.0072	114	0.787729	114	0.946263	114	0.0380918	114	0.304188	114	0.698617	114	0.796996
115	1.01047	115	1.00391	115	0.237524	115	0.810716	115	0.0453502	115	0.0508495	115	0.460391	115	0.691391
116	1.055	116	1.29538	116	0.905133	116	0.99103	116	0.044785	116	0.243361	116		116	0.877111
117		117		117		117		117		117		117		117
118	1.04339	118	1.04244	118	0.832408	118	0.953599	118	0.0187752	118	0.0740715	118	0.366535	118	0.903424
119	0.985593	119	1.08429	119	0.638631	119	0.821615	119	0.120258	119	0.0454153	119	0.208059	119	0.724855
120		120	0.478084	120		120		120		120		120		120	0.913691
121	0.983923	121	1.08636	121	0.890553	121	0.858996	121		121	0.0695826	121		121	0.836444
122	1.05674	122	1.07591	122	0.862016	122	0.852299	122		122	0.0961469	122	0.587817	122	0.828225
123	0.516184	123		123	0.677993	123	0.849873	123		123		123		123	0.8388
124	0.19016	124		124	0.869451	124	0.871706	124		124		124		124	0.928128
125	1.08389	125	1.05576	125		125	0.714277	125	0.076134	125	0.270806	125		125	0.698463
126	0.884528	126	1.00978	126		126	0.998092	126		126	-0.000582847	126		126	0.938024
127		127		127		127		127		127		127		127
128	1.2798	128	1.06435	128		128	0.59409	128	0.0212302	128	0.105986	128	0.391933	128	0.695047
129	1.08538	129	0.899288	129		129		129	0.0477014	129	0.12505	129	0.24295	129	0.38942
130	1.05877	130	0.948214	130		130		130	0.0831145	130	0.449789	130	0.282945	130	0.227858
131	1.06306	131	0.760968	131		131	0.707105	131	0.391882	131	0.325807	131	0.5811	131	0.814494
132		132	0.708052	132		132	1.01226	132	0.234171	132	0.702132	132	0.700064	132	0.681257
133		133		133		133		133		133		133		133
134	0.293098	134	0.196052	134		134	0.83878	134	0.56673	134	0.676723	134	0.843015	134	0.65441
135	1.05563	135	0.212892	135		135	0.608849	135	0.88097	135	0.830325	135	0.842563	135	0.854759
136	0.233951	136	0.557613	136	0.782084	136		136	0.793902	136	0.897432	136	0.892825	136	0.930106
137	0.190274	137	0.542207	137	0.864243	137	0.953314	137	0.753326	137	0.923834	137	0.962866	137
138	0.455596	138	0.814181	138		138	0.88417	138	0.79838	138	0.906038	138	0.800953	138	0.973089
139	0.127877	139	0.0818659	139		139		139	1.04262	139	1.05719	139	1.06574	139	0.71193
140		140		140	0.653278	140	1.08633	140	0.568997	140		140	0.850677	140	0.769577
141	0.00109659	141		141		141		141		141		141		141
142	0.0652075	142		142	0.833839	142	0.909346	142	1.12101	142	1.41837	142	1.05433	142	0.986049
143	-0.0111426	143	0.0688577	143		143		143	1.21293	143	0.967155	143	0.949274	143	0.452478
144		144		144	0.9205	144	0.675	144	1.0629	144	1.1577	144	1.04674	144	0.880809
145	0.0342628	145		145	0.494138	145	0.426925	145	1.19204	145	1.06257	145	0.99844	145	0.597566
146	-0.0149203	146		146	0.329403	146	0.251984	146	1.25569	146	1.07563	146	0.936627	146	0.653685
147	0.0323267	147	0.0713169	147	0.205693	147	0.358322	147	1.44283	147	1.07607	147	1.06148	147	0.61958
148	0.0418084	148		148	0.324857	148	0.424251	148	0.940419	148	1.13847	148	0.97133	148	0.621835
149	0.0294186	149		149	0.371749	149	0.352775	149	0.877976	149	0.635096	149	0.92832	149	0.544496
150	0.0162432	150		150	0.236047	150	0.256712	150	1.27365	150	0.858557	150	1.00627	150	0.487589
151	0.0518779	151		151	0.383033	151	0.432732	151	1.17257	151	1.46571	151	0.992417	151	0.575225
152	0.0663385	152		152		152	0.153799	152	1.03733	152	1.21088	152	1.06513	152	0.394133
153	0.0236238	153		153	0.564823	153		153	1.12855	153	1.33618	153	1.29882	153	0.76842
154		154		154		154		154	1.23309	154	1.26977	154	1.12606	154
155		155		155		155		155		155		155		155
156	0.181246	156	0.264866	156	0.40211	156	0.297923	156	1.06592	156	1.15317	156	0.999421	156	0.681452
157		157		157		157		157		157		157		157
158	0.145455	158		158	0.548279	158	0.411877	158	1.10753	158	1.15525	158	1.18418	158	0.560209
159		159		159		159		159		159		159		159
160		160		160		160		160		160		160		160
161	0.178078	161	0.775092	161	1.01863	161	1.07353	161		161		161		161	1.00106
162	0.789071	162	0.590009	162	0.66617	162	0.664527	162	0.971056	162	0.710496	162	0.778871	162	0.827156
163		163	0.126248	163		163	0.129536	163	1.1001	163	0.713426	163	0.986351	163	0.868502
164	1.08889	164	0.98918	164	0.896255	164	0.642551	164	1.10737	164	1.16476	164	0.385282	164	0.650991
165	0.429405	165	0.827275	165	0.597545	165	1.06193	165	0.915489	165	0.777197	165	0.892379	165	0.909302
166	0.965947	166	0.90161	166	0.998477	166	0.934921	166		166	0.391643	166	0.964405	166	0.802729
167	1.19298	167	0.948667	167	0.620059	167	0.625126	167	0.806018	167	0.510921	167	0.642213	167	0.704308
168		168		168		168	0.233742	168	0.856786	168		168	1.18716	168	0.310167
169	0.677153	169		169	0.707315	169	0.889459	169	0.814101	169	0.0971583	169		169	0.900842
170	0.811062	170		170	0.78364	170	0.869105	170	0.711252	170	0.193834	170	0.519602	170	0.794405
171	0.892996	171	0.792298	171		171	0.790939	171		171	0.146063	171		171	0.615205
172	0.773686	172	0.528174	172	0.705983	172	0.658696	172	0.808887	172		172	0.558776	172	0.763339
173	0.764644	173		173	0.927078	173	1.00043	173	0.79889	173	0.128751	173	0.131	173	0.900686
174	0.893849	174	1.22213	174	0.788978	174	0.928313	174	0.545647	174		174	0.118614	174	0.894889
175	0.786898	175	1.11191	175	0.832046	175	0.981877	175	0.732166	175		175	0.19841	175	0.898094
176	0.894124	176	0.913769	176	0.788015	176	0.998584	176	0.692539	176	0.0576093	176	0.0536155	176	0.9719
177	0.849952	177	1.10482	177	0.761175	177	0.938836	177	0.582662	177		177		177	0.943909
178	0.930805	178	1.03656	178	0.817	178	1.00514	178	0.581851	178	0.0108219	178		178	0.947487
179	0.974895	179	0.985503	179	0.865513	179	0.980239	179	0.7112	179	0.00372128	179	0.0177992	179	0.91618
180	0.938127	180	0.956167	180	0.754643	180	1.00719	180	0.707338	180	-0.00172664	180		180	0.936454
181	0.112495	181	0.498514	181		181		181	0.800324	181		181		181	0.764253
182		182		182		182		182		182		182		182
183	0.868173	183		183		183		183	0.710888	183	0.0763387	183		183	0.911253
184	0.880915	184	0.8525	184		184	0.995627	184	0.545033	184	0.00840752	184	0.0424815	184	0.91942
185	0.841585	185	0.905631	185	0.730712	185	0.991609	185	0.681535	185	0.0123255	185		185	0.915637
186	0.796908	186	0.944385	186	0.799732	186	1.00346	186	0.609923	186	0.0573927	186		186	0.9134
187	0.576384	187	0.754333	187		187	0.931877	187	0.396537	187	0.0363627	187	0.155536	187	0.887075
188	0.746371	188	0.886272	188	0.884698	188	0.989511	188	0.532339	188	0.289351	188	0.349549	188	0.928459
189	0.394648	189	0.877547	189	0.919386	189	1.00852	189	0.529455	189	0.0358019	189		189	0.921048
190	0.734993	190	0.944898	190	0.813509	190	0.988365	190	0.654015	190	0.0846365	190	0.0602002	190	0.955017
191	0.59232	191	0.927308	191	0.881855	191	1.01342	191	0.616672	191	0.0885489	191	0.10645	191	0.920007
192	0.0735863	192	0.860804	192		192	0.690819	192	0.240224	192	0.250579	192	0.140823	192	0.699442
193	0.252292	193		193	0.820176	193	0.887624	193		193		193		193	0.882237
194	0.0675961	194	0.585132	194	0.919285	194	0.963982	194	0.239058	194	0.330109	194	0.270637	194	0.714019
195	0.127976	195	1.00186	195	1.06941	195	1.24654	195	0.318003	195	0.52411	195	0.449627	195	0.843053
196	0.393193	196	0.72239	196	1.13264	196	0.974731	196	0.595904	196	0.84952	196	0.879217	196	0.78482
197		197		197		197		197		197		197		197
198	0.185778	198	0.61064	198	1.17205	198	0.771267	198	0.433248	198	0.672273	198	0.555577	198	0.633042
199		199		199		199		199		199		199		200
200	0.513826	200	0.907566	200	0.958243	200	1.2574	200	1.27009	200	1.17689	200	1.13526	200
201		201		201	0.899134	201	0.523844	201	1.03398	201	0.972719	201	0.944869	201	0.835888
202		202		202	0.525454	202	0.467876	202	1.27369	202	1.21009	202	0.901741	202	0.708665
203		203		203	0.443129	203	0.326655	203	1.0643	203	0.772316	203	0.925392	203	0.50011
204	1.0063	204	0.573564	204	0.44975	204	0.439723	204	0.343347	204		204	0.692142	204	0.880255
205	1.12959	205	1.06488	205	0.691169	205	0.841185	205		205		205	0.539355	205	0.769483
206	0.521117	206	0.798664	206	0.918749	206	0.698452	206	0.920907	206	0.748366	206	0.811464	206	0.969224
207	0.380036	207	0.828034	207	0.246508	207	0.678198	207	0.873465	207	0.935164	207	0.877427	207	0.974241
208	0.340817	208	0.607313	208	0.265919	208	0.396289	208	0.882412	208	0.907895	208	0.912169	208	0.945286
209	0.242061	209	0.51554	209	0.119873	209	0.262709	209	0.804781	209	0.769778	209	0.802454	209	0.932264
210	0.162872	210	0.747403	210	0.0522101	210	0.364266	210	0.874081	210	0.87736	210	0.818756	210	0.966918
211	0.548093	211	0.600653	211		211		211	1.21677	211	1.45144	211	1.02746	211	0.929915
212	0.408707	212	0.889211	212		212		212	1.17264	212	1.66368	212	0.742398	212	0.928316
213	0.324062	213	0.670398	213		213	0.258379	213	0.846458	213	0.962856	213	0.889293	213	0.982593
214	0.0887247	214	0.522997	214		214	0.0827297	214	0.639829	214	0.970287	214	0.845453	214	0.907023
215	0.0400848	215	0.0551323	215	0.118492	215	0.0999326	215		215	0.936339	215	0.911652	215	0.521358
216	0.0212281	216	0.286588	216	0.0224305	216	0.0809222	216	0.491727	216	0.789617	216	1.009	216	0.942248
217	0.0668817	217	0.566173	217	0.0114964	217	0.0328865	217	0.635238	217	0.720177	217	0.858797	217	0.928608
218		218	0.145177	218		218	0.37138	218	0.659143	218	1.16979	218	1.05572	218	0.765026
219	0.0942823	219	0.398029	219	0.0351475	219	0.0405791	219	0.581512	219	0.873784	219	0.944227	219	0.866812
220	0.114444	220	0.420429	220	0.0733213	220	0.0614611	220	0.615657	220	0.924125	220	0.950589	220	0.757503
221	0.170098	221	0.284525	221	0.0537066	221		221	0.613586	221	0.81606	221	0.943503	221	0.815424
222	0.209242	222	0.367309	222		222	0.0400256	222	0.495843	222	0.91906	222	0.891362	222	0.896376
223	0.0978574	223	0.266948	223	0.0541481	223		223	0.374288	223	0.771421	223	0.833363	223	0.583944
224	0.128165	224	0.403017	224	0.0439691	224		224	0.688389	224	0.97083	224	0.990136	224	0.744508
225	0.117317	225	0.25979	225	0.106208	225		225	0.803822	225	1.02608	225	0.972947	225	0.710812
226	0.121225	226	0.14922	226	0.0445703	226	0.00711357	226	0.579774	226	0.788756	226	0.839541	226	0.487801
227	0.0873785	227	0.262618	227	0.0816367	227	0.0125746	227	0.65448	227	0.949515	227	0.995851	227	0.462276
228	0.148641	228	0.282494	228	0.148223	228	0.0230849	228	0.651017	228	0.915246	228	0.956011	228	0.387192
229	0.0833087	229	0.152454	229	0.0336487	229	0.00853455	229	0.514967	229	0.953272	229	0.972368	229	0.406327
230	0.137498	230	0.377694	230	0.0971241	230		230	0.745681	230	1.04968	230	0.996984	230	0.228418
231		231		231	0.23063	231		231	0.39012	231	0.58122	231	0.393866	231	0.375324
232	0.0727106	232	0.153051	232	0.13047	232	0.0178045	232	0.524177	232	0.965192	232	0.950618	232	0.0610935
233	0.0760259	233	0.424329	233	0.352387	233	0.0180997	233	0.759077	233	0.991205	233	1.00718	233	0.0171226
234	0.199362	234	0.551245	234	0.921697	234	0.0929899	234	0.711698	234	0.924998	234	0.942236	234
235	0.351666	235	0.72907	235	0.97339	235	0.00563958	235	0.771552	235	0.68791	235	0.731642	235
236	0.247076	236	0.636132	236	0.934079	236	0.160513	236	0.769417	236	0.829575	236	0.983697	236	0.0306184
237	0.222074	237	0.560441	237	0.984611	237	0.257711	237	0.537862	237	0.977321	237	0.99673	237	0.0294894
238	0.273514	238	0.688801	238	1.02114	238	0.176523	238	0.718666	238	1.03559	238	1.00652	238
239	0.216659	239	0.581415	239	1.026	239	0.636983	239	0.544242	239	0.889997	239	0.953772	239
240	0.107242	240	0.130093	240	0.888522	240	0.700003	240	0.224737	240	0.551641	240	0.642964	240	0.0544341
241	0.159932	241	0.216075	241	0.757249	241	0.684978	241	0.270929	241	0.635245	241	0.840415	241
242	0.200949	242	0.13057	242	0.852925	242	0.735139	242	0.280452	242	0.411017	242	0.541915	242	0.0521201
243	0.241198	243	0.372858	243	0.940347	243	0.593486	243	0.323557	243	0.839828	243	0.890538	243	0.00120963
244	0.332825	244	0.35112	244	0.932436	244	0.855609	244	0.38401	244	0.721477	244	0.907292	244	0.00488346
245	1.06622	245	1.03858	245	0.354712	245	0.60738	245	0.172512	245	0.0793236	245	0.359004	245
246	0.287265	246	0.336083	246	0.934321	246	0.738509	246	0.342968	246	0.696979	246	0.772241	246	0.128456
247	0.424756	247	0.560722	247	0.986633	247	0.873861	247	0.522587	247	0.834537	247	0.873973	247	0.12475
248	0.210111	248	0.189265	248	0.820239	248	0.553562	248	0.283277	248	0.552959	248	0.662631	248	0.0986382
249	0.104681	249	0.305932	249	0.924232	249	0.630101	249	0.283471	249	0.309975	249	0.761655	249	0.0933812
