# Supplementary material for: Structure and physiological function of the human KCNQ1 channel voltage sensor intermediate state
Source: eLife. 2020 Feb 25;9:e53901. doi: 10.7554/eLife.53901 (PMC7069725; doi:10.7554/eLife.53901)
Supplement: Figure 1—figure supplement 2—source data 1. [file elife-53901-fig1-figsupp2-data1.xlsx]

## Sheet: Sheet1
	Residue	alpha-helix	13C alpha (PPM) devation from random coil	13C' (PPM) devation from random coil
	100	0.333	1.9	0.9
	101	0.779	1	1.4
	102	0.779	0.6	1.2
	103	0.547	0.5	0.1
	104	0.177	1.3	0.7
	105	0.129	0.1	0.9
	106	0.377	1.6	1
	107	0.684	1.9	1.4
	108	0.864	0.8	2.7
	109	0.918	1.3	2.1
	110	0.974	3.4	2
	111	0.981	2.3	2.1
	112	0.948	2.2	1.3
	113	0.94	2.5	0.5
	114	0.847	1.1	0
	115	0.411	-0.5
	116	0.066	-2	0.9
	117	0.008	0.8	1
	118	0.016	1.1	1.5
	119	0.154	0.6	2.1
	120	0.902	1.6	1.5
	121	0.978	3.8	2.5
	122	0.996	3.2	2.1
	123	0.993	4	2.1
	124	0.996	5.2	2.5
	125	0.994	2.7	2
	126	0.982	3.5	1.4
	127	0.992	3.1	1.9
	128	0.991	3.3	2
	129	0.993	5.1
	130	0.988	3.4
	131	0.991
	132	0.987	4.9	3.3
	133	0.989	5.5
	134	0.985	3.7	2.7
	135	0.993	5.4	3
	136	0.995	6.1	1.4
	137	0.994	3.3	3
	138	0.981	4.7	3.3
	139	0.97	4.3	2.1
	140	0.956		1.9
	141	0.974	5.1	2.1
	142	0.979	3.5	2.1
	143	0.976	3.3	1.7
	144	0.993		2.6
	145	0.994	3.8	1.7
	146	0.974	1.7	1.5
	147	0.96	1.9	3.3
	148	0.975		1
	149	0.973	3.2	1.7
	150	0.947	1	1.1
	151	0.908	0.9	0.8
	152	0.901	0.5	3.4
	153	0.743	4.2
	154	0.353	-0.7
	155	-0.05
	156	-0.05		1.7
	157	-0.05
	158	-0.05	2.1
	159	-0.05		0.2
	160	-0.05		2.6
	161	0.977	3.4	2.7
	162	0.965	5.3	0
	163	0.928	1.3
	164	-0.05
	165	-0.05
	166	-0.05		0.6
	167	-0.05		0.9
	168	-0.05	0.3	1.7
	169	0.897		0.8
	170	0.975	2.6	2.9
	171	0.993	5.9	2.5
	172	0.99	4.8	3.6
	173	0.993	4.9	3.7
	174	0.987	3	2.4
	175	0.995	2.7	2.5
	176	0.987	2.1	1.3
	177	0.969	2.2	2.6
	178	0.881	1.3	1.2
	179	0.754	0.6	0.4
	180	0.748	1.8	1.5
	181	0.813	1.3	1.7
	182	0.821	1.2	1.4
	183	0.882	1.2	1.7
	184	0.882	1.1	2.6
	185	0.891	3.2	1.9
	186	0.841	0.6	1.6
	187	0.908	2.4
	188	0.893	1.7	1.4
	189	0.831	0.9	1.7
	190	0.802	0.5	0.3
	191	0.67	0.6	2.5
	192	0.459	0.5	0.2
	193	0.373	0	0
	194	0.101	-0.1	0.3
	195	0.027	-0.1
	196	0.014	-0.4	2.3
	197	0.257		3.2
	198	0.851	2.2
	199	0.961	6.8
	200	0.988		1.5
	201	0.962	2.5	-0.2
	202	0.96	2.3	0.2
	203	0.983	2.3	2.5
	204	0.989	4.7	3.9
	205	0.995	5.3	3.4
	206	0.997	5.2	2.7
	207	0.988	5.3	2.5
	208	0.993	3.2	1.9
	209	0.991	4.3	3.9
	210	0.985	2.8	4
	211	0.982	5.4	2.4
	212	0.982	5.2	2.9
	213	0.988	3.4	1.7
	214	0.987	4.2	2.5
	215	0.932	2.9	1.2
	216	0.697	0.8
	217	0.372	1.4	1.5
	218	0.497	0.5	0.9
	219	0.797	1.1	1.9
	220	0.934	2.3	2.2
	221	0.975	2.8	1.4
	222	0.975	1.9	1.7
	223	0.977	2	1.8
	224	0.971	3.4	1.4
	225	0.977	2.7	1.8
	226	0.987	2	2.2
	227	0.97	2.2	2.6
	228	0.877	1.8	0.6
	229	0.792	0.7	2.1
	230	0.898	2.2	2.8
	231	0.959	1.2	2
	232	0.994	3.2	2.2
	233	0.994	2.7	2.8
	234	0.99	2.6	2.6
	235	0.992	3.2	2.4
	236	0.983	2.8	2.8
	237	0.975	2.3	2.1
	238	0.91	1.4	0
	239	0.63	0.8	0
	240	0.176	0.1	0.4
	241	0.061	0.9	0.2
	242	0.038	-0.4	1.2
	243	0.052	0.1
	244	0.056	0.4	0.7
	245	0.029	-0.3	0.2
	246	0.014	-0.2	-0.4
	247	0.033	0.6	-0.5
	248	0.426	-0.4
	249	0.333	0.5
