# Supplementary material for: Structure and physiological function of the human KCNQ1 channel voltage sensor intermediate state
Source: eLife. 2020 Feb 25;9:e53901. doi: 10.7554/eLife.53901 (PMC7069725; doi:10.7554/eLife.53901)
Supplement: Figure 2—figure supplement 1—source data 2. [file elife-53901-fig2-figsupp1-data2.xlsx]

## Sheet: Sheet1
	Residue	PRE	NOE: seq	NOE: med	NOE: long
	100	0	5.5	8	0
	101	0	9	2	0
	102	0	7.5	6.5	0
	103	0	8	6.5	0
	104	0	7.5	5.5	0
	105	0	8	3.5	0
	106	0	7.5	4	0
	107	0	5.5	4.5	0
	108	0	4.5	1	0
	109	0	5.5	1.5	0
	110	0	5.5	9	0.5
	111	0	4	3	0
	112	0	3.5	3.5	0
	113	0	4.5	5.5	0
	114	0	9	5.5	3
	115	0	8.5	4	0
	116	0	2.5	0.5	0
	117	0	0.5	0	0
	118	0	2.5	1.5	0
	119	0	3	0	0
	120	0	1.5	1.5	0
	121	0	3	3.5	0
	122	5	4	1	0
	123	0	5	0.5	0
	124	6	6.5	7.5	0
	125	3	5	4.5	0
	126	2	3	3	0
	127	4	4.5	2.5	0
	128	5	5.5	9.5	0
	129	5	2.5	3.5	1.5
	130	2	1.5	1.5	0
	131	5	2.5	3.5	0
	132	2	2.5	3	1.5
	133	0	3.5	3.5	0.5
	134	2	4.5	4	0
	135	5	6.5	1.5	0
	136	0	5.5	2	0
	137	2	1	4.5	0.5
	138	2	0.5	1	0
	139	3	1.5	1.5	0
	140	5	1	0	0
	141	4	0.5	0.5	0
	142	3	1	0	0
	143	6	1	0	0
	144	0	3	0	0
	145	5	4	2.5	0
	146	2	2	0.5	0
	147	6	0.5	1.5	0
	148	2	0.5	1.5	0
	149	1	1	2.5	0
	150	5	3	1	0
	151	0	4.5	1	0
	152	5	3.5	1.5	0
	153	6	3	1	0
	154	3	1.5	1	0
	155	0	0	0	0
	156	1	0	0	0
	157	0	0	0	0
	158	2	0	0.5	0
	159	0	0	0	0
	160	0	0	0	0
	161	0	0.5	0.5	0
	162	3	1	0	0
	163	5	1.5	0	1.5
	164	0	1	0	0
	165	1	0	0	0
	166	0	0	0	0
	167	0	0	0	0
	168	3	0.5	0	0.5
	169	5	1	0	0
	170	7	1.5	0	0
	171	4	1	0.5	0.5
	172	1	0	0	0
	173	0	3	2	1.5
	174	3	3	0	1
	175	1	3	3	0
	176	6	5	1.5	0
	177	0	2.5	1	1
	178	7	3.5	2.5	1.5
	179	7	5	1.5	0
	180	0	2	0.5	0
	181	4	1	1.5	0
	182	4	2	2	0
	183	3	5.5	1	0
	184	3	8	6	0
	185	3	5	2.5	1
	186	5	3	0.5	0.5
	187	4	7	6	0
	188	1	8.5	3	0
	189	6	6	1	0
	190	2	6	1.5	0
	191	4	6	5	0
	192	3	3	0	0
	193	0	5.5	1	0
	194	6	9.5	2	0.5
	195	5	4.5	0.5	0
	196	1	0.5	0	0
	197	0	0	0	0
	198	0	0.5	0.5	0
	199	1	0.5	0.5	0
	200	4	1	0	0
	201	2	1	0.5	1
	202	3	0	0	0
	203	6	0	1	0.5
	204	0	0.5	0	0
	205	3	1.5	1	1
	206	2	1.5	3	0.5
	207	7	5.5	2	0.5
	208	6	7.5	5	1
	209	8	3.5	1	0
	210	5	2	6	0
	211	0	1.5	6.5	0.5
	212	0	1.5	1.5	0.5
	213	3	4	2	0
	214	0	7.5	2.5	0
	215	2	7.5	2.5	0.5
	216	5	3	0	0
	217	5	1.5	0.5	0
	218	1	4	5.5	0
	219	6	4.5	2	0
	220	4	5.5	4.5	0
	221	4	8	8	0
	222	1	8.5	4	1
	223	0	5.5	4	0
	224	0	3	10.5	0
	225	5	4	2	0
	226	5	7.5	4.5	0.5
	227	8	8.5	6	0
	228	8	6.5	3	0
	229	7	4.5	1	0
	230	2	5.5	4.5	1
	231	2	5.5	6	0
	232	7	5	10	0
	233	6	4.5	5	1
	234	5	5.5	7.5	0
	235	0	7.5	10	0.5
	236	3	6.5	4.5	1
	237	7	6	3.5	0.5
	238	0	5.5	3	1
	239	3	8	4.5	0.5
	240	3	8	1.5	0
	241	0	6.5	4.5	1.5
	242	0	5	2	0
	243	0	6	1.5	0
	244	0	6.5	3.5	0
	245	0	2.5	1	0
	246	0	2	0.5	0
	247	0	5.5	1.5	1
	248	0	6	0	0.5
	249	0	2	0.5	0
	250
