# Supplementary material for: Structure and physiological function of the human KCNQ1 channel voltage sensor intermediate state
Source: eLife. 2020 Feb 25;9:e53901. doi: 10.7554/eLife.53901 (PMC7069725; doi:10.7554/eLife.53901)
Supplement: Figure 2—figure supplement 1—source data 3. [file elife-53901-fig2-figsupp1-data3.xlsx]

## Sheet: Sheet1
	Residue	XplorNIH backbone RMSD
	100	7.431
	101	6.789
	102	5.686
	103	4.984
	104	4.552
	105	4.385
	106	3.549
	107	2.834
	108	2.494
	109	2.328
	110	1.785
	111	1.313
	112	1.489
	113	1.606
	114	1.658
	115	1.779
	116	1.859
	117	1.871
	118	1.822
	119	1.46
	120	1.412
	121	1.283
	122	1.181
	123	1.16
	124	1.16
	125	1.02
	126	0.978
	127	1.08
	128	0.918
	129	0.798
	130	0.925
	131	1.018
	132	0.84
	133	0.749
	134	0.919
	135	1.079
	136	1.02
	137	0.941
	138	1.079
	139	1.27
	140	1.21
	141	1.144
	142	1.355
	143	1.417
	144	1.259
	145	1.23
	146	1.602
	147	1.616
	148	1.629
	149	1.715
	150	1.973
	151	2.758
	152	2.994
	153	2.788
	154	2.453
	155	2.159
	156	2.478
	157	2.473
	158	2.048
	159	2.116
	160	1.292
	161	1.142
	162	1.078
	163	0.969
	164	0.978
	165	1.138
	166	1.069
	167	1.002
	168	1.109
	169	1.195
	170	1.1
	171	1.101
	172	1.244
	173	1.204
	174	1.224
	175	1.379
	176	1.403
	177	1.36
	178	1.664
	179	1.968
	180	1.671
	181	2.26
	182	2.743
	183	2.542
	184	2.931
	185	2.672
	186	2.317
	187	2.574
	188	2.759
	189	2.737
	190	2.844
	191	2.788
	192	3.248
	193	2.86
	194	2.477
	195	3.264
	196	2.761
	197	2.286
	198	1.67
	199	1.541
	200	1.461
	201	1.22
	202	1.123
	203	1.006
	204	0.941
	205	0.899
	206	0.885
	207	0.689
	208	0.691
	209	0.816
	210	0.847
	211	0.865
	212	0.988
	213	1.123
	214	1.257
	215	1.446
	216	1.886
	217	2.488
	218	1.832
	219	1.841
	220	1.643
	221	1.429
	222	1.219
	223	1.124
	224	0.963
	225	0.945
	226	0.868
	227	0.741
	228	0.867
	229	0.903
	230	0.737
	231	0.63
	232	0.85
	233	0.929
	234	0.773
	235	0.755
	236	0.863
	237	0.918
	238	0.962
	239	1.312
	240	1.613
	241	1.983
	242	3.332
	243	3.623
	244	3.664
	245	3.962
	246	3.598
	247	2.713
	248	4.019
	249	5.116
	250
