# Supplementary material for: Structure and physiological function of the human KCNQ1 channel voltage sensor intermediate state
Source: eLife. 2020 Feb 25;9:e53901. doi: 10.7554/eLife.53901 (PMC7069725; doi:10.7554/eLife.53901)
Supplement: Figure 2—figure supplement 1—source data 4. [file elife-53901-fig2-figsupp1-data4.xlsx]

## Sheet: Sheet1
Time (ns)	r.m.s.d. all residues	r.m.s.d. transmembrane residues
0.005	0	0
0.01	0.6454	0.5478
0.015	0.6455	0.4868
0.02	0.7364	0.6399
0.025	0.6757	0.5604
0.03	0.7464	0.6352
0.035	0.8546	0.64
0.04	0.8241	0.6614
0.045	0.8286	0.7136
0.05	0.8855	0.7428
0.055	0.9058	0.6772
0.06	0.8555	0.6591
0.065	0.8715	0.8091
0.07	0.9194	0.748
0.075	0.867	0.6388
0.08	0.9102	0.8194
0.085	0.9322	0.777
0.09	0.8114	0.6457
0.095	0.8161	0.6548
0.1	0.8852	0.581
0.105	0.8551	0.6307
0.11	0.9769	0.7794
0.115	0.9808	0.8289
0.12	0.8927	0.706
0.125	0.9456	0.7764
0.13	1.0734	0.7802
0.135	0.9706	0.6846
0.14	1.0113	0.7673
0.145	0.9703	0.7663
0.15	1.0826	0.855
0.155	0.9793	0.7224
0.16	0.876	0.6267
0.165	0.9776	0.742
0.17	0.952	0.6795
0.175	0.8695	0.6841
0.18	0.9885	0.6177
0.185	0.9399	0.7513
0.19	1.0283	0.8387
0.195	0.9944	0.8387
0.2	1.0135	0.8665
0.205	1.0842	0.801
0.21	1.0847	0.8288
0.215	1.0405	0.8665
0.22	1.0883	0.8921
0.225	1.069	0.8914
0.23	1.0213	0.8431
0.235	1.1097	0.8538
0.24	1.0556	0.9032
0.245	1.081	0.9207
0.25	1.0349	0.8356
0.255	1.1254	0.8955
0.26	1.1324	0.9214
0.265	1.1083	0.9251
0.27	1.1915	0.9637
0.275	1.141	0.9197
0.28	1.1682	0.9168
0.285	1.2111	0.9682
0.29	1.1991	0.8797
0.295	1.3054	0.9989
0.3	1.3558	0.9516
0.305	1.3858	1.066
0.31	1.3681	1.0109
0.315	1.2829	1.044
0.32	1.2925	0.9556
0.325	1.2402	0.9853
0.33	1.1888	0.9275
0.335	1.2616	1.0006
0.34	1.2272	0.9509
0.345	1.3043	0.9664
0.35	1.3008	0.9558
0.355	1.2552	0.9206
0.36	1.2509	0.9775
0.365	1.2488	0.9087
0.37	1.4311	1.009
0.375	1.3855	0.9371
0.38	1.3729	0.9759
0.385	1.304	0.9419
0.39	1.4259	1.0051
0.395	1.3738	1.0866
0.4	1.3592	1.0206
0.405	1.427	1.0252
0.41	1.4477	1.0377
0.415	1.4611	1.1096
0.42	1.3142	0.9791
0.425	1.3754	1.0631
0.43	1.3335	1.0849
0.435	1.4795	1.1873
0.44	1.3622	1.0416
0.445	1.4424	1.1193
0.45	1.3992	1.0817
0.455	1.3575	0.9895
0.46	1.2336	0.9486
0.465	1.328	1.0147
0.47	1.2995	1.0313
0.475	1.2445	0.9942
0.48	1.2243	1.0208
0.485	1.3086	1.173
0.49	1.4144	1.1581
0.495	1.3396	1.0938
0.5	1.4091	1.1389
0.505	1.546	1.2651
0.51	1.5212	1.2437
0.515	1.4901	1.1708
0.52	1.3774	1.0554
0.525	1.3309	1.1052
0.53	1.4385	1.0642
0.535	1.5387	1.319
0.54	1.4291	1.1792
0.545	1.4397	1.1071
0.55	1.5415	1.1792
0.555	1.4942	1.2412
0.56	1.482	1.2879
0.565	1.4184	1.151
0.57	1.4704	1.1306
0.575	1.3517	1.0767
0.58	1.3742	1.1522
0.585	1.3238	1.0777
0.59	1.2732	1.0867
0.595	1.2965	1.1147
0.6	1.4892	1.2409
0.605	1.4557	1.2367
0.61	1.4998	1.2187
0.615	1.563	1.2415
0.62	1.6566	1.2696
0.625	1.7223	1.3968
0.63	1.644	1.1996
0.635	1.5622	1.2265
0.64	1.5432	1.2377
0.645	1.6912	1.2571
0.65	1.5127	1.1556
0.655	1.4607	1.231
0.66	1.4363	1.2221
0.665	1.498	1.2423
0.67	1.4045	1.2216
0.675	1.508	1.1405
0.68	1.4872	1.1807
0.685	1.3886	1.1835
0.69	1.4179	1.1916
0.695	1.4756	1.1255
0.7	1.412	1.1339
0.705	1.4824	1.2115
0.71	1.4243	1.0997
0.715	1.5641	1.1762
0.72	1.365	1.1479
0.725	1.4923	1.239
0.73	1.5304	1.1901
0.735	1.4811	1.2047
0.74	1.6045	1.3024
0.745	1.3769	1.1591
0.75	1.5359	1.3303
0.755	1.4163	1.2238
0.76	1.4519	1.2953
0.765	1.5093	1.2034
0.77	1.6687	1.4258
0.775	1.6351	1.3544
0.78	1.5952	1.3222
0.785	1.4142	1.1898
0.79	1.4955	1.2638
0.795	1.4027	1.2486
0.8	1.3414	1.1655
0.805	1.3958	1.2032
0.81	1.4539	1.2673
0.815	1.4127	1.1656
0.82	1.6473	1.3813
0.825	1.5678	1.306
0.83	1.3964	1.1851
0.835	1.4478	1.1736
0.84	1.539	1.3446
0.845	1.5039	1.221
0.85	1.4549	1.191
0.855	1.4788	1.2323
0.86	1.4893	1.225
0.865	1.5245	1.3221
0.87	1.4782	1.2553
0.875	1.5157	1.2471
0.88	1.6636	1.2652
0.885	1.6245	1.362
0.89	1.6873	1.3223
0.895	1.7151	1.3987
0.9	1.596	1.2848
0.905	1.7718	1.4532
0.91	1.6979	1.3022
0.915	1.6899	1.3446
0.92	1.69	1.3736
0.925	1.7734	1.3226
0.93	1.6865	1.2834
0.935	1.8572	1.3761
0.94	1.8137	1.4264
0.945	1.8223	1.4029
0.95	1.7476	1.4907
0.955	1.7189	1.4076
0.96	1.7952	1.4424
0.965	1.7559	1.4063
0.97	1.8526	1.4754
0.975	1.878	1.4944
0.98	1.7919	1.4292
0.985	1.8252	1.5374
0.99	1.7387	1.3008
0.995	1.7827	1.4264
1	1.7738	1.4266
1.005	1.8788	1.5116
1.01	1.8395	1.3594
1.015	1.8658	1.4236
1.02	1.8356	1.453
1.025	1.9527	1.513
1.03	1.9069	1.4145
1.035	1.744	1.2912
1.04	1.7576	1.3618
1.045	1.7723	1.4272
1.05	1.7968	1.4492
1.055	1.7591	1.3898
1.06	1.7763	1.3828
1.065	1.7072	1.177
1.07	1.7343	1.2669
1.075	1.6865	1.2902
1.08	1.7242	1.3609
1.085	1.6966	1.3121
1.09	1.7308	1.3448
1.095	1.5786	1.1838
1.1	1.6505	1.2791
1.105	1.5475	1.219
1.11	1.5506	1.1838
1.115	1.6322	1.3078
1.12	1.4907	1.1237
1.125	1.5945	1.1947
1.13	1.5326	1.1899
1.135	1.5429	1.1835
1.14	1.6516	1.3432
1.145	1.6414	1.3161
1.15	1.5693	1.2729
1.155	1.6005	1.268
1.16	1.652	1.2136
1.165	1.6804	1.3337
1.17	1.6549	1.3104
1.175	1.675	1.2915
1.18	1.6709	1.3109
1.185	1.6911	1.3324
1.19	1.7806	1.3538
1.195	1.8058	1.3794
1.2	1.6697	1.2485
1.205	1.6991	1.3305
1.21	1.6671	1.2645
1.215	1.6203	1.1913
1.22	1.5767	1.2068
1.225	1.553	1.2389
1.23	1.4717	1.1247
1.235	1.6279	1.1565
1.24	1.7064	1.1902
1.245	1.5848	1.1001
1.25	1.6383	1.2247
1.255	1.7281	1.2456
1.26	1.8405	1.3457
1.265	1.7761	1.3045
1.27	1.7017	1.3789
1.275	1.7044	1.36
1.28	1.8534	1.3826
1.285	1.9013	1.3772
1.29	1.9091	1.3322
1.295	1.9814	1.3505
1.3	2.021	1.4401
1.305	1.9338	1.3287
1.31	1.977	1.3058
1.315	1.9538	1.4183
1.32	2.0405	1.457
1.325	2.0194	1.4347
1.33	1.9476	1.4661
1.335	2.0376	1.5608
1.34	2.2946	1.658
1.345	2.3365	1.6249
1.35	2.2506	1.586
1.355	2.1487	1.4789
1.36	2.2132	1.607
1.365	2.1098	1.5667
1.37	2.0574	1.505
1.375	1.9722	1.5348
1.38	2.0862	1.5836
1.385	1.9934	1.4465
1.39	1.8211	1.3753
1.395	2.0052	1.4465
1.4	1.8419	1.3484
1.405	1.7495	1.2172
1.41	1.8083	1.2707
1.415	1.8948	1.3461
1.42	1.8551	1.3775
1.425	1.9289	1.4146
1.43	1.8072	1.2413
1.435	1.8006	1.3416
1.44	1.7891	1.3422
1.445	1.666	1.2393
1.45	1.641	1.2263
1.455	1.7309	1.2591
1.46	1.7561	1.3111
1.465	1.7745	1.2966
1.47	1.6506	1.1402
1.475	1.6922	1.2789
1.48	1.6342	1.2023
1.485	1.7002	1.1585
1.49	1.6315	1.1535
1.495	1.7094	1.1547
1.5	1.8539	1.3232
1.505	1.764	1.2301
1.51	1.7347	1.224
1.515	1.7579	1.1589
1.52	1.7261	1.1307
1.525	1.7787	1.2415
1.53	1.8329	1.3155
1.535	1.8342	1.3089
1.54	1.7445	1.2854
1.545	1.9641	1.3924
1.55	1.9588	1.3409
1.555	1.7846	1.2447
1.56	1.8124	1.2631
1.565	1.8406	1.2966
1.57	1.768	1.1971
1.575	1.7896	1.2695
1.58	1.7649	1.3239
1.585	1.7762	1.3661
1.59	1.6492	1.2613
1.595	1.656	1.2484
1.6	1.708	1.2118
1.605	1.6895	1.3513
1.61	1.722	1.364
1.615	1.7903	1.4058
1.62	1.835	1.3554
1.625	1.7058	1.3149
1.63	1.7183	1.2831
1.635	1.6866	1.2806
1.64	1.6669	1.2394
1.645	1.7211	1.34
1.65	1.6722	1.3624
1.655	1.6572	1.2375
1.66	1.7288	1.3467
1.665	1.6762	1.3172
1.67	1.5301	1.218
1.675	1.5625	1.2094
1.68	1.693	1.2965
1.685	1.7626	1.4136
1.69	1.7846	1.4173
1.695	1.7916	1.4031
1.7	1.7493	1.3032
1.705	1.6384	1.2682
1.71	1.6709	1.3633
1.715	1.6419	1.3075
1.72	1.6784	1.3398
1.725	1.61	1.199
1.73	1.6517	1.2169
1.735	1.8714	1.4095
1.74	1.7307	1.241
1.745	1.7546	1.357
1.75	1.718	1.3689
1.755	1.7598	1.2641
1.76	1.6881	1.2734
1.765	1.5745	1.2784
1.77	1.6751	1.2803
1.775	1.5965	1.2351
1.78	1.656	1.2864
1.785	1.6341	1.2055
1.79	1.6671	1.1883
1.795	1.7306	1.2353
1.8	1.8313	1.388
1.805	1.707	1.2888
1.81	1.7993	1.3614
1.815	1.7046	1.3099
1.82	1.6724	1.293
1.825	1.5872	1.1818
1.83	1.5975	1.1705
1.835	1.5237	1.1495
1.84	1.7289	1.3422
1.845	1.6211	1.1473
1.85	1.7158	1.239
1.855	1.7484	1.2821
1.86	1.7686	1.2592
1.865	1.7558	1.3036
1.87	1.7501	1.304
1.875	1.7474	1.2921
1.88	1.8038	1.3161
1.885	1.6545	1.3242
1.89	1.7341	1.3411
1.895	1.7352	1.3439
1.9	1.8062	1.4086
1.905	1.7762	1.2727
1.91	1.7181	1.2942
1.915	1.7957	1.3551
1.92	1.9006	1.4971
1.925	1.7766	1.2786
1.93	1.9346	1.4256
1.935	1.9554	1.4661
1.94	1.8706	1.3527
1.945	1.9246	1.351
1.95	2.0272	1.4339
1.955	1.9897	1.4105
1.96	2.0187	1.4551
1.965	1.9863	1.4329
1.97	1.9882	1.3228
1.975	1.9145	1.4268
1.98	1.9965	1.4515
1.985	2.1111	1.4983
1.99	1.8974	1.3575
1.995	1.9073	1.3961
2	1.8447	1.366
2.005	1.8019	1.3546
2.01	1.8488	1.3506
2.015	1.9078	1.4681
2.02	1.8	1.3554
2.025	1.8849	1.4052
2.03	1.8087	1.372
2.035	1.7907	1.2954
2.04	1.7668	1.2737
2.045	1.8075	1.3522
2.05	1.7901	1.3242
2.055	1.6963	1.2947
2.06	1.6122	1.276
2.065	1.7342	1.3106
2.07	1.6293	1.195
2.075	1.7178	1.2517
2.08	1.6558	1.2623
2.085	1.872	1.282
2.09	1.7419	1.2414
2.095	1.8391	1.3569
2.1	1.7207	1.3105
2.105	1.7448	1.366
2.11	1.8991	1.5556
2.115	1.8205	1.4532
2.12	1.8193	1.4379
2.125	1.9402	1.4804
2.13	1.9708	1.5273
2.135	1.9352	1.4652
2.14	1.9843	1.5105
2.145	1.885	1.4483
2.15	1.931	1.482
2.155	2.0439	1.5331
2.16	1.9671	1.5937
2.165	1.9536	1.6237
2.17	1.8927	1.5362
2.175	1.8366	1.4654
2.18	1.8444	1.441
2.185	1.7422	1.3484
2.19	1.8354	1.5463
2.195	1.951	1.5415
2.2	1.9381	1.5096
2.205	1.9513	1.3716
2.21	1.979	1.4812
2.215	1.9576	1.518
2.22	2.0281	1.4929
2.225	2.0766	1.5387
2.23	1.9706	1.4969
2.235	2.0133	1.5438
2.24	1.8691	1.398
2.245	2.0141	1.503
2.25	1.8856	1.4758
2.255	1.8654	1.4626
2.26	1.8364	1.4923
2.265	1.8641	1.4543
2.27	1.9066	1.4455
2.275	1.8987	1.497
2.28	1.9321	1.4466
2.285	1.9985	1.5329
2.29	2.0015	1.539
2.295	1.9002	1.5194
2.3	1.8056	1.3891
2.305	1.8116	1.4547
2.31	1.7761	1.4451
2.315	1.9258	1.559
2.32	1.8904	1.5807
2.325	1.9045	1.5592
2.33	1.8993	1.5579
2.335	1.7256	1.4849
2.34	1.8341	1.499
2.345	1.8181	1.4712
2.35	1.9302	1.6648
2.355	1.8691	1.5687
2.36	1.8372	1.5281
2.365	1.9248	1.6457
2.37	1.8852	1.5687
2.375	1.8655	1.4688
2.38	1.7669	1.4174
2.385	1.8805	1.5593
2.39	1.7276	1.4579
2.395	1.8709	1.444
2.4	1.858	1.4462
2.405	1.774	1.3243
2.41	1.8227	1.4167
2.415	1.6433	1.2469
2.42	1.8684	1.433
2.425	1.7267	1.3514
2.43	1.6901	1.3785
2.435	1.624	1.2365
2.44	1.788	1.336
2.445	1.7329	1.3018
2.45	1.6902	1.3026
2.455	1.8555	1.463
2.46	1.9008	1.4852
2.465	1.7084	1.3241
2.47	1.8462	1.452
2.475	1.7898	1.5225
2.48	1.743	1.2886
2.485	1.8093	1.4315
2.49	1.7627	1.4702
2.495	1.6768	1.4342
2.5	1.6611	1.3547
2.505	1.6984	1.4219
2.51	1.7118	1.4016
2.515	1.8984	1.4665
2.52	1.8048	1.4505
2.525	1.8445	1.5289
2.53	1.7789	1.4218
2.535	1.9031	1.5507
2.54	1.7171	1.4095
2.545	1.8921	1.5165
2.55	1.8274	1.534
2.555	1.8814	1.4731
2.56	1.8033	1.4421
2.565	1.7725	1.4553
2.57	1.8177	1.4773
2.575	1.7468	1.4515
2.58	1.7852	1.3996
2.585	1.9312	1.4435
2.59	1.8229	1.3797
2.595	1.905	1.5545
2.6	1.8794	1.4897
2.605	1.8126	1.46
2.61	1.8607	1.4781
2.615	1.8741	1.5723
2.62	1.7723	1.4394
2.625	1.8935	1.4902
2.63	1.8441	1.4935
2.635	1.7791	1.4421
2.64	1.8757	1.5663
2.645	1.7673	1.4311
2.65	1.8453	1.4546
2.655	1.8166	1.405
2.66	1.8895	1.4248
2.665	1.7838	1.3826
2.67	1.7433	1.3216
2.675	1.9461	1.659
2.68	1.8797	1.4971
2.685	1.8698	1.4682
2.69	1.9208	1.4746
2.695	1.8636	1.4471
2.7	1.9187	1.6308
2.705	1.8578	1.4666
2.71	1.9732	1.6107
2.715	1.9628	1.5771
2.72	1.9006	1.5047
2.725	1.9126	1.5109
2.73	1.9417	1.4635
2.735	1.9457	1.4773
2.74	1.8597	1.4427
2.745	1.9109	1.4392
2.75	1.8858	1.4852
2.755	1.9286	1.625
2.76	2.0006	1.5927
2.765	2.0157	1.6311
2.77	1.9389	1.5613
2.775	1.9088	1.4375
2.78	1.9773	1.4547
2.785	2.1159	1.6246
2.79	2.0723	1.5767
2.795	2.0633	1.5265
2.8	1.95	1.5024
2.805	1.8777	1.498
2.81	2.1094	1.6493
2.815	1.9858	1.533
2.82	2.0254	1.5952
2.825	2.0341	1.6362
2.83	2.0124	1.5873
2.835	2.0007	1.6253
2.84	1.9662	1.6394
2.845	2.0032	1.6211
2.85	2.0041	1.5983
2.855	1.8981	1.526
2.86	1.9912	1.5946
2.865	1.9561	1.6257
2.87	2.0788	1.6373
2.875	2.0699	1.7034
2.88	1.9674	1.5858
2.885	2.1165	1.6529
2.89	2.0758	1.6964
2.895	2.1217	1.6998
2.9	2.0346	1.6048
2.905	2.0401	1.6119
2.91	2.0257	1.5863
2.915	1.8824	1.5383
2.92	1.9228	1.6236
2.925	1.8909	1.5075
2.93	1.8849	1.576
2.935	1.9301	1.5853
2.94	1.8963	1.5866
2.945	1.8596	1.5009
2.95	1.7986	1.5002
2.955	1.8088	1.5566
2.96	1.8076	1.5275
2.965	1.7837	1.5433
2.97	1.8786	1.5776
2.975	1.8513	1.5357
2.98	1.8705	1.5617
2.985	1.8342	1.5105
2.99	1.8886	1.4907
2.995	1.8362	1.5156
3	1.885	1.4607
3.005	1.8892	1.5454
3.01	1.8549	1.4754
3.015	1.9499	1.533
3.02	1.9905	1.6113
3.025	1.8086	1.4055
3.03	1.7502	1.4795
3.035	1.8402	1.4525
3.04	1.8258	1.4651
3.045	1.86	1.4618
3.05	1.801	1.3997
3.055	1.8138	1.4464
3.06	1.8432	1.4406
3.065	1.7977	1.5077
3.07	1.886	1.5465
3.075	1.952	1.5657
3.08	1.9309	1.4796
3.085	1.8739	1.5128
3.09	1.8841	1.424
3.095	1.8556	1.468
3.1	1.8765	1.4058
3.105	1.9582	1.4976
3.11	1.8084	1.3205
3.115	1.8167	1.4027
3.12	1.9915	1.4642
3.125	1.8827	1.376
3.13	1.9851	1.493
3.135	1.9782	1.5064
3.14	1.846	1.4476
3.145	1.9854	1.5221
3.15	1.9829	1.4383
3.155	1.9391	1.5966
3.16	2.0134	1.6048
3.165	1.9897	1.5038
3.17	1.9668	1.5911
3.175	1.927	1.5069
3.18	1.901	1.4926
3.185	2.0188	1.5507
3.19	2.0993	1.5642
3.195	2.0191	1.5623
3.2	1.9938	1.5416
3.205	1.9872	1.5036
3.21	1.9155	1.4634
3.215	1.9552	1.5039
3.22	2.1067	1.5407
3.225	2.1544	1.5498
3.23	2.1223	1.636
3.235	2.189	1.5511
3.24	2.1918	1.6243
3.245	2.3077	1.6506
3.25	2.3418	1.7336
3.255	2.3394	1.702
3.26	2.1855	1.6409
3.265	2.1717	1.6462
3.27	2.1223	1.6736
3.275	2.086	1.5314
3.28	2.0236	1.5076
3.285	2.0449	1.4383
3.29	2.0866	1.5838
3.295	2.0267	1.4891
3.3	1.9734	1.4811
3.305	2.0008	1.4305
3.31	2.1419	1.5085
3.315	2.0182	1.5002
3.32	2.0105	1.5303
3.325	1.8871	1.4057
3.33	1.9813	1.5169
3.335	1.9713	1.4943
3.34	2.0766	1.5649
3.345	2.0323	1.5354
3.35	1.9483	1.5278
3.355	2.0232	1.468
3.36	2.0723	1.5675
3.365	2.1278	1.6286
3.37	2.0732	1.4904
3.375	2.0517	1.4667
3.38	2.1238	1.5388
3.385	1.9989	1.3858
3.39	2.018	1.4768
3.395	2.0162	1.451
3.4	2.1058	1.4357
3.405	2.0925	1.4035
3.41	2.1094	1.4837
3.415	1.9681	1.3872
3.42	1.9818	1.3302
3.425	2.1651	1.552
3.43	2.1203	1.4416
3.435	2.1261	1.474
3.44	2.1114	1.4175
3.445	2.0024	1.4821
3.45	1.9215	1.3735
3.455	1.9279	1.3249
3.46	1.8702	1.3284
3.465	1.8623	1.2878
3.47	1.9575	1.3054
3.475	1.9402	1.3356
3.48	1.8346	1.3064
3.485	1.8709	1.4931
3.49	1.9849	1.4035
3.495	1.8667	1.4059
3.5	1.8758	1.3484
3.505	1.9272	1.3704
3.51	1.9121	1.4144
3.515	2.0023	1.451
3.52	1.9448	1.4581
3.525	1.9712	1.3816
3.53	1.9946	1.4341
3.535	2.027	1.4838
3.54	2.0697	1.5485
3.545	1.9567	1.4529
3.55	1.9188	1.3732
3.555	2.1022	1.4731
3.56	2.0324	1.3734
3.565	2.0766	1.4789
3.57	2.1286	1.5116
3.575	2.0518	1.4771
3.58	1.9834	1.3926
3.585	2.1195	1.4515
3.59	2.1469	1.4354
3.595	2.0742	1.3915
3.6	2.1625	1.4162
3.605	2.1102	1.3235
3.61	1.9697	1.3888
3.615	2.0282	1.3211
3.62	2.0244	1.3707
3.625	2.0698	1.2917
3.63	2.0519	1.4122
3.635	2.0534	1.4633
3.64	2.0568	1.3799
3.645	1.9422	1.2486
3.65	1.9587	1.3357
3.655	2.1044	1.3837
3.66	1.9945	1.4279
3.665	2.0297	1.432
3.67	2.0224	1.4632
3.675	2.1152	1.4622
3.68	2.0764	1.3829
3.685	2.0398	1.3513
3.69	2.0523	1.4303
3.695	1.9129	1.2727
3.7	1.9967	1.3751
3.705	1.9265	1.3737
3.71	1.9183	1.3943
3.715	1.8488	1.3462
3.72	1.908	1.4252
3.725	1.9359	1.4402
3.73	1.9481	1.473
3.735	1.8913	1.4093
3.74	1.8948	1.4189
3.745	1.9574	1.4017
3.75	1.9467	1.4324
3.755	1.8853	1.3641
3.76	1.9682	1.3899
3.765	1.9834	1.3762
3.77	1.9182	1.3861
3.775	1.95	1.3172
3.78	1.9138	1.3375
3.785	1.9812	1.4824
3.79	1.9546	1.4751
3.795	1.9599	1.4548
3.8	1.9482	1.4247
3.805	2.1074	1.5158
3.81	2.0297	1.4366
3.815	1.9252	1.3989
3.82	1.9319	1.4133
3.825	1.9028	1.4172
3.83	1.9475	1.4129
3.835	1.8167	1.3286
3.84	1.9184	1.3945
3.845	1.8674	1.3753
3.85	1.9325	1.3971
3.855	1.9759	1.4075
3.86	2.0468	1.4981
3.865	2.0687	1.5137
3.87	1.9207	1.3382
3.875	1.9422	1.4481
3.88	1.9527	1.44
3.885	1.9747	1.4322
3.89	2.0613	1.5211
3.895	2.0517	1.4439
3.9	1.9632	1.3714
3.905	1.9369	1.355
3.91	1.9998	1.363
3.915	2.0189	1.4124
3.92	2.0521	1.3889
3.925	2.0838	1.3886
3.93	2.0952	1.4501
3.935	2.0923	1.4373
3.94	2.0069	1.3703
3.945	2.158	1.4672
3.95	2.1737	1.4719
3.955	2.151	1.4672
3.96	2.0124	1.3945
3.965	2.0411	1.3879
3.97	2.0403	1.3408
3.975	2.1286	1.3943
3.98	2.0175	1.3753
3.985	2.1225	1.3968
3.99	2.125	1.5473
3.995	2.0989	1.4371
4	2.1747	1.4959
4.005	2.1956	1.5455
4.01	2.0273	1.4115
4.015	2.0234	1.4201
4.02	2.0322	1.4518
4.025	2.0272	1.4255
4.03	2.0949	1.5167
4.035	2.1831	1.4729
4.04	2.0392	1.4471
4.045	2.0864	1.4029
4.05	2.1606	1.5299
4.055	2.0118	1.381
4.06	2.1478	1.4645
4.065	2.189	1.4842
4.07	2.2829	1.4803
4.075	2.2832	1.5423
4.08	2.2396	1.4946
4.085	2.2579	1.4438
4.09	2.1703	1.4492
4.095	2.0966	1.5014
4.1	2.1745	1.4618
4.105	2.1599	1.4982
4.11	2.0792	1.4309
4.115	2.0714	1.3976
4.12	2.2771	1.4935
4.125	2.218	1.535
4.13	2.2142	1.5166
4.135	2.1026	1.3981
4.14	2.2515	1.537
4.145	2.1823	1.4239
4.15	2.1794	1.5947
4.155	2.165	1.5038
4.16	2.1184	1.4129
4.165	2.1601	1.4647
4.17	2.2178	1.5224
4.175	2.1874	1.5376
4.18	2.251	1.7181
4.185	2.2702	1.5801
4.19	2.2593	1.5312
4.195	2.2072	1.5009
4.2	2.2403	1.5418
4.205	2.1612	1.4978
4.21	2.1498	1.473
4.215	2.2597	1.5604
4.22	2.1517	1.4878
4.225	2.1299	1.4486
4.23	2.147	1.5101
4.235	2.2303	1.5148
4.24	2.382	1.5831
4.245	2.1945	1.5391
4.25	2.0451	1.4336
4.255	2.1684	1.4891
4.26	2.336	1.5548
4.265	2.3648	1.5636
4.27	2.3211	1.461
4.275	2.2776	1.4941
4.28	2.2944	1.5142
4.285	2.3594	1.5402
4.29	2.2568	1.4518
4.295	2.467	1.7359
4.3	2.3899	1.6336
4.305	2.3243	1.5402
4.31	2.4078	1.5724
4.315	2.3845	1.5882
4.32	2.573	1.6325
4.325	2.6283	1.6407
4.33	2.7214	1.7325
4.335	2.752	1.7628
4.34	2.5675	1.6451
4.345	2.5529	1.5685
4.35	2.5567	1.6212
4.355	2.6539	1.6794
4.36	2.6336	1.697
4.365	2.6283	1.739
4.37	2.6499	1.7824
4.375	2.7248	1.7889
4.38	2.7965	1.851
4.385	2.6615	1.6112
4.39	2.7018	1.8097
4.395	2.5512	1.808
4.4	2.7152	1.8444
4.405	2.7129	1.7942
4.41	2.6124	1.7968
4.415	2.5336	1.7749
4.42	2.3501	1.5668
4.425	2.4875	1.7019
4.43	2.513	1.7305
4.435	2.4286	1.6081
4.44	2.5281	1.7402
4.445	2.3561	1.58
4.45	2.4014	1.618
4.455	2.4916	1.6916
4.46	2.3229	1.6784
4.465	2.4732	1.8163
4.47	2.494	1.7721
4.475	2.4377	1.6923
4.48	2.4379	1.8803
4.485	2.3738	1.6844
4.49	2.3863	1.7503
4.495	2.4942	1.8777
4.5	2.5712	1.8467
4.505	2.4117	1.8
4.51	2.4216	1.749
4.515	2.3743	1.7947
4.52	2.3815	1.732
4.525	2.4739	1.7999
4.53	2.3485	1.7409
4.535	2.3331	1.711
4.54	2.4058	1.7343
4.545	2.3084	1.7505
4.55	2.4797	1.9421
4.555	2.5195	1.819
4.56	2.5087	1.9184
4.565	2.5266	1.7899
4.57	2.5936	1.8677
4.575	2.5528	1.835
4.58	2.3618	1.6801
4.585	2.4507	1.8224
4.59	2.3316	1.8086
4.595	2.281	1.811
4.6	2.4719	1.9277
4.605	2.2903	1.6017
4.61	2.4144	1.8167
4.615	2.5484	1.9363
4.62	2.539	1.9556
4.625	2.5528	1.9225
4.63	2.4961	1.8834
4.635	2.5311	1.9866
4.64	2.4982	1.9321
4.645	2.6374	1.9119
4.65	2.5757	1.8929
4.655	2.5859	1.9543
4.66	2.5193	1.9931
4.665	2.4318	1.9555
4.67	2.3692	1.8348
4.675	2.4648	1.9278
4.68	2.571	1.9512
4.685	2.5113	1.9053
4.69	2.5335	1.9837
4.695	2.6037	2.0314
4.7	2.3576	1.7655
4.705	2.5405	1.8736
4.71	2.3368	1.7461
4.715	2.5333	1.8695
4.72	2.4372	1.7306
4.725	2.2546	1.6268
4.73	2.3834	1.6495
4.735	2.4198	1.7492
4.74	2.4731	1.7383
4.745	2.3568	1.6997
4.75	2.4186	1.7168
4.755	2.5952	1.9049
4.76	2.7162	2.0031
4.765	2.6161	1.8624
4.77	2.6053	1.8483
4.775	2.5865	1.8336
4.78	2.4651	1.7925
4.785	2.497	1.8065
4.79	2.4859	1.7339
4.795	2.5572	1.9055
4.8	2.5278	1.8626
4.805	2.5013	1.8674
4.81	2.404	1.8045
4.815	2.4829	1.7862
4.82	2.4965	1.8648
4.825	2.3778	1.7229
4.83	2.3819	1.6456
4.835	2.4546	1.7685
4.84	2.4262	1.8528
4.845	2.5239	1.7737
4.85	2.4906	1.7675
4.855	2.5694	1.7727
4.86	2.5236	1.7901
4.865	2.4059	1.6888
4.87	2.5063	1.858
4.875	2.49	1.8663
4.88	2.5153	1.8057
4.885	2.3125	1.7385
4.89	2.4091	1.8126
4.895	2.4055	1.8117
4.9	2.569	1.9244
4.905	2.5346	1.8537
4.91	2.5123	1.7773
4.915	2.5367	1.8055
4.92	2.5385	1.8785
4.925	2.6392	1.8236
4.93	2.5773	1.8486
4.935	2.6026	1.8983
4.94	2.5591	1.8524
4.945	2.6147	1.9013
4.95	2.6706	2.0412
4.955	2.6624	1.8689
4.96	2.6753	2.0004
4.965	2.7325	2.0366
4.97	2.6077	1.7867
4.975	2.633	1.9465
4.98	2.6159	1.9605
4.985	2.6261	1.9097
4.99	2.5499	1.8235
4.995	2.5022	1.7824
5	2.4296	1.7434
5.005	2.3444	1.6452
5.01	2.6163	1.8643
5.015	2.4768	1.8344
5.02	2.4616	1.8687
5.025	2.4954	1.7206
5.03	2.5697	1.6984
5.035	2.6052	1.8016
5.04	2.5265	1.737
5.045	2.5699	1.7513
5.05	2.6405	1.8141
5.055	2.7233	1.9123
5.06	2.6524	1.8891
5.065	2.7359	1.9973
5.07	2.6759	1.9792
5.075	2.7269	1.9939
5.08	2.6909	2.0483
5.085	2.6943	1.9824
5.09	2.6283	1.8659
5.095	2.7976	1.9508
5.1	2.764	1.971
5.105	2.783	1.8784
5.11	2.611	1.8011
5.115	2.6024	1.8254
5.12	2.6666	1.8745
5.125	2.566	1.834
5.13	2.6286	1.8688
5.135	2.5197	1.8163
5.14	2.6606	1.9277
5.145	2.5989	1.8975
5.15	2.613	1.877
5.155	2.4541	1.7861
5.16	2.5786	1.9248
5.165	2.5736	1.961
5.17	2.4854	1.7912
5.175	2.3665	1.6146
5.18	2.4061	1.7514
5.185	2.5196	1.7307
5.19	2.4428	1.6753
5.195	2.4195	1.6312
5.2	2.5714	1.8569
5.205	2.5469	1.8532
5.21	2.5603	1.8051
5.215	2.5365	1.832
5.22	2.465	1.8219
5.225	2.4897	1.8852
5.23	2.4731	1.8493
5.235	2.5003	1.7067
5.24	2.4645	1.7913
5.245	2.436	1.7991
5.25	2.6262	1.9558
5.255	2.474	1.804
5.26	2.6021	1.8288
5.265	2.685	1.9338
5.27	2.5177	1.8369
5.275	2.628	1.9839
5.28	2.6267	1.8561
5.285	2.6673	1.9714
5.29	2.7102	1.9476
5.295	2.6714	1.8881
5.3	2.7715	1.9506
5.305	2.7419	1.945
5.31	2.6922	1.8751
5.315	2.6912	1.9704
5.32	2.6332	1.8913
5.325	2.5785	1.8945
5.33	2.6692	1.8941
5.335	2.4789	1.7027
5.34	2.5211	1.8269
5.345	2.4922	1.8571
5.35	2.5864	1.8763
5.355	2.5755	1.7724
5.36	2.4839	1.6936
5.365	2.4866	1.7537
5.37	2.5224	1.7297
5.375	2.5099	1.717
5.38	2.4478	1.6554
5.385	2.3655	1.6465
5.39	2.3529	1.7126
5.395	2.3594	1.6518
5.4	2.3358	1.5843
5.405	2.5166	1.7309
5.41	2.5696	1.7425
5.415	2.5889	1.756
5.42	2.718	1.8362
5.425	2.6997	1.8355
5.43	2.6081	1.7839
5.435	2.5769	1.7777
5.44	2.5074	1.7473
5.445	2.5564	1.8059
5.45	2.5688	1.9613
5.455	2.5052	1.8861
5.46	2.5737	1.8752
5.465	2.4947	1.7805
5.47	2.452	1.6544
5.475	2.5872	1.7761
5.48	2.8024	1.9225
5.485	2.7412	1.8963
5.49	2.7225	1.8425
5.495	2.6992	1.8695
5.5	2.7499	1.9136
5.505	2.6461	1.7541
5.51	2.5293	1.6112
5.515	2.7131	1.8222
5.52	2.7476	1.8637
5.525	2.6112	1.7719
5.53	2.5047	1.7258
5.535	2.6049	1.7217
5.54	2.4589	1.6797
5.545	2.5241	1.7739
5.55	2.4786	1.8432
5.555	2.5444	1.7363
5.56	2.5822	1.816
5.565	2.5405	1.7545
5.57	2.5878	1.7294
5.575	2.6212	1.8823
5.58	2.4776	1.7758
5.585	2.597	1.7714
5.59	2.6216	1.8519
5.595	2.5133	1.7439
5.6	2.4288	1.7157
5.605	2.4841	1.7712
5.61	2.6304	1.8819
5.615	2.5836	1.8168
5.62	2.5795	1.8737
5.625	2.6146	1.8692
5.63	2.5605	1.7948
5.635	2.7552	1.854
5.64	2.5863	1.809
5.645	2.6191	1.8832
5.65	2.5385	1.8282
5.655	2.6064	1.8523
5.66	2.5853	1.8825
5.665	2.5953	1.8609
5.67	2.5905	1.8634
5.675	2.448	1.7958
5.68	2.4595	1.8748
5.685	2.4854	1.8292
5.69	2.3743	1.8088
5.695	2.3951	1.8993
5.7	2.3099	1.8302
5.705	2.3732	1.8658
5.71	2.4622	1.8355
5.715	2.4833	1.97
5.72	2.4785	1.8761
5.725	2.4009	1.8111
5.73	2.5005	1.8815
5.735	2.4032	1.8696
5.74	2.4363	1.808
5.745	2.4644	1.7462
5.75	2.3398	1.7001
5.755	2.3971	1.785
5.76	2.5197	1.9158
5.765	2.592	1.873
5.77	2.4954	1.829
5.775	2.4997	1.8206
5.78	2.6034	1.8376
5.785	2.4881	1.8364
5.79	2.521	1.7968
5.795	2.4591	1.6981
5.8	2.5503	1.7692
5.805	2.5814	1.7229
5.81	2.6106	1.773
5.815	2.6353	1.7606
5.82	2.5516	1.7915
5.825	2.5691	1.8454
5.83	2.5905	1.8222
5.835	2.6069	1.796
5.84	2.6296	1.8537
5.845	2.5723	1.7919
5.85	2.552	1.83
5.855	2.6014	1.8798
5.86	2.5551	1.812
5.865	2.5289	1.8039
5.87	2.5211	1.7956
5.875	2.683	1.8275
5.88	2.6615	1.875
5.885	2.6485	1.8725
5.89	2.5916	1.7636
5.895	2.5855	1.8246
5.9	2.5876	1.8444
5.905	2.6458	1.7993
5.91	2.5046	1.8614
5.915	2.5994	1.7885
5.92	2.5647	1.7766
5.925	2.4325	1.7651
5.93	2.62	1.7058
5.935	2.5954	1.7119
5.94	2.5697	1.7199
5.945	2.6852	1.8064
5.95	2.7387	1.8376
5.955	2.5832	1.8353
5.96	2.6518	1.777
5.965	2.628	1.7216
5.97	2.6469	1.7376
5.975	2.6232	1.8024
5.98	2.4145	1.6123
5.985	2.5021	1.787
5.99	2.666	1.834
5.995	2.6184	1.7641
6	2.5933	1.7439
6.005	2.6868	1.8596
6.01	2.7478	1.901
6.015	2.6545	1.8174
6.02	2.6531	1.755
6.025	2.5632	1.8569
6.03	2.5467	1.7353
6.035	2.5411	1.8164
6.04	2.523	1.8535
6.045	2.5584	1.9338
6.05	2.6733	1.98
6.055	2.6941	1.877
6.06	2.6108	1.7243
6.065	2.682	1.8706
6.07	2.7138	1.8631
6.075	2.7812	1.9222
6.08	2.6094	1.8139
6.085	2.6062	1.8184
6.09	2.5503	1.6695
6.095	2.5334	1.8076
6.1	2.6374	1.7861
6.105	2.675	1.8777
6.11	2.5491	1.7531
6.115	2.4231	1.7
6.12	2.5397	1.8258
6.125	2.6473	1.9255
6.13	2.6408	1.805
6.135	2.6427	1.7581
6.14	2.5456	1.8278
6.145	2.6172	1.8201
6.15	2.693	1.8894
6.155	2.6157	1.7946
6.16	2.5552	1.8279
6.165	2.5044	1.7677
6.17	2.4657	1.6963
6.175	2.4847	1.8047
6.18	2.2869	1.6786
6.185	2.3108	1.6889
6.19	2.3174	1.6142
6.195	2.3591	1.7507
6.2	2.4821	1.7592
6.205	2.4418	1.7769
6.21	2.541	1.7847
6.215	2.5259	1.8222
6.22	2.4673	1.7747
6.225	2.5486	1.8567
6.23	2.5212	1.825
6.235	2.583	1.8535
6.24	2.5337	1.8615
6.245	2.5007	1.7388
6.25	2.4279	1.6785
6.255	2.4909	1.7749
6.26	2.546	1.8039
6.265	2.598	1.8225
6.27	2.5164	1.8523
6.275	2.6494	1.9124
6.28	2.4878	1.8276
6.285	2.4208	1.6723
6.29	2.5074	1.7448
6.295	2.4339	1.7349
6.3	2.3541	1.6294
6.305	2.3303	1.5564
6.31	2.4656	1.7062
6.315	2.4097	1.6633
6.32	2.4767	1.6803
6.325	2.4944	1.6698
6.33	2.5252	1.7451
6.335	2.6228	1.821
6.34	2.6503	1.9119
6.345	2.6807	1.8043
6.35	2.6299	1.7937
6.355	2.5639	1.7792
6.36	2.4559	1.8008
6.365	2.343	1.7146
6.37	2.3526	1.7519
6.375	2.292	1.5946
6.38	2.3596	1.6472
6.385	2.4595	1.7742
6.39	2.5212	1.7292
6.395	2.4845	1.7647
6.4	2.5355	1.716
6.405	2.6604	1.8249
6.41	2.6609	1.8363
6.415	2.6739	1.7649
6.42	2.694	1.8401
6.425	2.6611	1.7727
6.43	2.5559	1.9234
6.435	2.5033	1.8589
6.44	2.5292	1.7726
6.445	2.4911	1.7857
6.45	2.5672	1.7458
6.455	2.5014	1.8571
6.46	2.5398	1.7552
6.465	2.5098	1.6939
6.47	2.4878	1.662
6.475	2.5529	1.7378
6.48	2.4493	1.7224
6.485	2.525	1.7279
6.49	2.5467	1.7473
6.495	2.4443	1.7272
6.5	2.3161	1.6576
6.505	2.4372	1.6592
6.51	2.5344	1.7568
6.515	2.4714	1.807
6.52	2.3765	1.7059
6.525	2.4273	1.7137
6.53	2.476	1.8378
6.535	2.5004	1.8172
6.54	2.346	1.7807
6.545	2.3434	1.5959
6.55	2.4397	1.7168
6.555	2.3039	1.6462
6.56	2.3981	1.7451
6.565	2.5357	1.7632
6.57	2.4592	1.6633
6.575	2.4968	1.6836
6.58	2.5721	1.7812
6.585	2.5473	1.6228
6.59	2.5891	1.808
6.595	2.5023	1.8372
6.6	2.5828	1.6916
6.605	2.5056	1.7635
6.61	2.5443	1.7886
6.615	2.5921	1.8393
6.62	2.62	1.7343
6.625	2.5795	1.842
6.63	2.5126	1.8688
6.635	2.4598	1.8559
6.64	2.5733	1.8217
6.645	2.5605	1.8245
6.65	2.4396	1.696
6.655	2.4753	1.8002
6.66	2.5189	1.7928
6.665	2.4775	1.7993
6.67	2.3859	1.7753
6.675	2.5041	1.7923
6.68	2.6488	1.8971
6.685	2.6156	1.8598
6.69	2.6345	1.838
6.695	2.5306	1.81
6.7	2.5491	1.8164
6.705	2.6211	1.804
6.71	2.6604	1.7646
6.715	2.5968	1.8519
6.72	2.4479	1.686
6.725	2.4464	1.714
6.73	2.5719	1.7514
6.735	2.6008	1.7052
6.74	2.47	1.6431
6.745	2.4375	1.6396
6.75	2.5586	1.7311
6.755	2.4241	1.729
6.76	2.4592	1.7843
6.765	2.4927	1.8484
6.77	2.6122	1.8435
6.775	2.6326	1.8205
6.78	2.688	1.8716
6.785	2.6255	1.7754
6.79	2.5243	1.6791
6.795	2.611	1.7443
6.8	2.6372	1.8812
6.805	2.5604	1.8061
6.81	2.4818	1.6655
6.815	2.5138	1.7922
6.82	2.556	1.67
6.825	2.6169	1.7394
6.83	2.6233	1.7479
6.835	2.6693	1.6806
6.84	2.6833	1.7487
6.845	2.6734	1.7656
6.85	2.576	1.7462
6.855	2.588	1.7499
6.86	2.7125	1.752
6.865	2.6956	1.7899
6.87	2.6375	1.7206
6.875	2.537	1.638
6.88	2.71	1.8282
6.885	2.7066	1.6787
6.89	2.6675	1.6785
6.895	2.5911	1.6991
6.9	2.6657	1.6787
6.905	2.624	1.7127
6.91	2.6097	1.6455
6.915	2.6294	1.6241
6.92	2.6565	1.7267
6.925	2.553	1.6667
6.93	2.5627	1.7695
6.935	2.5219	1.691
6.94	2.4781	1.6647
6.945	2.5585	1.7012
6.95	2.5014	1.6984
6.955	2.5927	1.853
6.96	2.5326	1.7396
6.965	2.613	1.7897
6.97	2.4892	1.6441
6.975	2.4509	1.6921
6.98	2.4966	1.6766
6.985	2.6002	1.7464
6.99	2.5713	1.7444
6.995	2.4876	1.6802
7	2.625	1.8648
7.005	2.6411	1.6918
7.01	2.5582	1.7733
7.015	2.6518	1.7462
7.02	2.6601	1.9271
7.025	2.5636	1.796
7.03	2.5063	1.755
7.035	2.5194	1.7229
7.04	2.4376	1.6791
7.045	2.5052	1.7704
7.05	2.5296	1.7475
7.055	2.5503	1.7269
7.06	2.4744	1.7973
7.065	2.4914	1.8299
7.07	2.4682	1.7195
7.075	2.6005	1.8371
7.08	2.6011	1.8141
7.085	2.5996	1.839
7.09	2.5768	1.7621
7.095	2.4855	1.7717
7.1	2.4421	1.7199
7.105	2.5403	1.7119
7.11	2.5252	1.7747
7.115	2.5985	1.8331
7.12	2.598	1.7358
7.125	2.5211	1.7342
7.13	2.5326	1.7625
7.135	2.5664	1.8359
7.14	2.6317	1.8538
7.145	2.6946	1.8597
7.15	2.7529	2.0078
7.155	2.7235	2.0223
7.16	2.7451	1.9878
7.165	2.6904	1.9628
7.17	2.6731	1.8467
7.175	2.594	1.831
7.18	2.6063	1.8407
7.185	2.5341	1.7
7.19	2.4837	1.6476
7.195	2.5848	1.7157
7.2	2.5468	1.6793
7.205	2.7322	1.8438
7.21	2.6023	1.7669
7.215	2.6558	1.7657
7.22	2.5523	1.6819
7.225	2.5003	1.6144
7.23	2.6633	1.803
7.235	2.6071	1.8634
7.24	2.5888	1.7167
7.245	2.6871	1.8032
7.25	2.6293	1.7635
7.255	2.6863	1.7013
7.26	2.5975	1.7035
7.265	2.5012	1.67
7.27	2.5177	1.6731
7.275	2.6097	1.8074
7.28	2.7084	1.8922
7.285	2.5463	1.7917
7.29	2.5134	1.7363
7.295	2.6029	1.7886
7.3	2.5191	1.7135
7.305	2.5646	1.7517
7.31	2.581	1.7888
7.315	2.4511	1.7059
7.32	2.5926	1.8379
7.325	2.5801	1.6822
7.33	2.4999	1.7296
7.335	2.5789	1.7543
7.34	2.6948	1.8381
7.345	2.6215	1.7135
7.35	2.6702	1.8033
7.355	2.6403	1.724
7.36	2.5994	1.879
7.365	2.6609	1.8377
7.37	2.53	1.8551
7.375	2.5169	1.8201
7.38	2.534	1.8518
7.385	2.4662	1.7471
7.39	2.5607	1.7436
7.395	2.4693	1.6423
7.4	2.5613	1.6807
7.405	2.63	1.7494
7.41	2.6633	1.7801
7.415	2.5608	1.716
7.42	2.5149	1.7317
7.425	2.5601	1.7789
7.43	2.4954	1.6227
7.435	2.5069	1.6896
7.44	2.4538	1.654
7.445	2.5154	1.626
7.45	2.4938	1.7321
7.455	2.5693	1.682
7.46	2.5454	1.7463
7.465	2.4707	1.6485
7.47	2.5881	1.8685
7.475	2.6383	1.7783
7.48	2.5907	1.731
7.485	2.5108	1.7174
7.49	2.6574	1.7781
7.495	2.4984	1.5862
7.5	2.549	1.6908
7.505	2.6315	1.8313
7.51	2.7191	1.878
7.515	2.6112	1.8227
7.52	2.5208	1.7706
7.525	2.6325	1.8494
7.53	2.5222	1.7526
7.535	2.6108	1.844
7.54	2.5525	1.7147
7.545	2.5836	1.7756
7.55	2.4875	1.7096
7.555	2.5644	1.7664
7.56	2.4523	1.7335
7.565	2.5781	1.8407
7.57	2.6242	1.9297
7.575	2.6406	1.9362
7.58	2.6418	1.947
7.585	2.5738	1.9423
7.59	2.609	1.9736
7.595	2.5978	1.9206
7.6	2.6176	1.9633
7.605	2.6013	1.9865
7.61	2.6314	1.9525
7.615	2.6433	1.9038
7.62	2.7339	1.9801
7.625	2.7149	1.8778
7.63	2.6244	1.9464
7.635	2.5936	1.9183
7.64	2.6063	1.8543
7.645	2.5414	1.7974
7.65	2.4882	1.7703
7.655	2.584	1.8247
7.66	2.59	1.8966
7.665	2.5604	1.881
7.67	2.5185	1.8849
7.675	2.6305	1.8673
7.68	2.6407	1.9237
7.685	2.5406	1.8399
7.69	2.6103	1.8671
7.695	2.6883	1.8832
7.7	2.6815	1.9153
7.705	2.6872	1.7923
7.71	2.5993	1.8823
7.715	2.5378	1.8602
7.72	2.502	1.8513
7.725	2.5834	1.8272
7.73	2.5171	1.7291
7.735	2.5302	1.711
7.74	2.6731	1.7982
7.745	2.6714	1.7459
7.75	2.5694	1.7785
7.755	2.5847	1.7296
7.76	2.4465	1.7753
7.765	2.551	1.6906
7.77	2.6179	1.7612
7.775	2.6177	1.7906
7.78	2.4937	1.685
7.785	2.6055	1.7025
7.79	2.6438	1.714
7.795	2.6061	1.7621
7.8	2.5174	1.7911
7.805	2.5423	1.6938
7.81	2.5764	1.7089
7.815	2.616	1.7424
7.82	2.6122	1.6422
7.825	2.5728	1.6894
7.83	2.5436	1.6139
7.835	2.5522	1.7375
7.84	2.556	1.7416
7.845	2.5064	1.7113
7.85	2.5463	1.7945
7.855	2.4773	1.7217
7.86	2.5373	1.7764
7.865	2.4423	1.714
7.87	2.4416	1.6775
7.875	2.4729	1.7318
7.88	2.521	1.7411
7.885	2.4933	1.7054
7.89	2.4466	1.7888
7.895	2.3293	1.7645
7.9	2.4011	1.7198
7.905	2.395	1.7865
7.91	2.3851	1.7324
7.915	2.3649	1.7166
7.92	2.4122	1.7311
7.925	2.3908	1.7716
7.93	2.4232	1.7751
7.935	2.5052	1.8912
7.94	2.4861	1.7499
7.945	2.5069	1.8481
7.95	2.4615	1.7723
7.955	2.3978	1.8121
7.96	2.3791	1.6573
7.965	2.3843	1.7001
7.97	2.3763	1.7221
7.975	2.5561	1.8903
7.98	2.5054	1.8838
7.985	2.4054	1.7797
7.99	2.5364	1.8084
7.995	2.5028	1.8411
8	2.455	1.8106
8.005	2.5819	1.8348
8.01	2.5782	1.9385
8.015	2.4311	1.777
8.02	2.5001	1.8448
8.025	2.5322	1.8671
8.03	2.5297	1.8935
8.035	2.4941	1.8412
8.04	2.531	1.8852
8.045	2.4431	1.8125
8.05	2.4513	1.8217
8.055	2.3942	1.7815
8.06	2.4087	1.8622
8.065	2.518	1.882
8.07	2.3552	1.7892
8.075	2.451	1.7408
8.08	2.3647	1.6777
8.085	2.5146	1.7641
8.09	2.3705	1.723
8.095	2.366	1.689
8.1	2.4415	1.7367
8.105	2.4997	1.7893
8.11	2.4496	1.7106
8.115	2.3409	1.7612
8.12	2.3336	1.6539
8.125	2.3554	1.7087
8.13	2.5064	1.9079
8.135	2.5163	1.8664
8.14	2.6039	1.8557
8.145	2.6237	1.8581
8.15	2.7501	1.8996
8.155	2.7429	1.8898
8.16	2.5993	1.858
8.165	2.684	1.8547
8.17	2.503	1.764
8.175	2.5792	1.8384
8.18	2.6722	1.8208
8.185	2.7139	1.8992
8.19	2.4895	1.7182
8.195	2.4287	1.6972
8.2	2.3884	1.6856
8.205	2.4892	1.7641
8.21	2.5739	1.8479
8.215	2.5049	1.8656
8.22	2.6855	1.9225
8.225	2.6011	1.8894
8.23	2.6532	1.8368
8.235	2.6034	1.8684
8.24	2.567	1.7806
8.245	2.6262	1.7854
8.25	2.6128	1.8299
8.255	2.5954	1.8809
8.26	2.5651	1.6767
8.265	2.6894	1.825
8.27	2.6363	1.7953
8.275	2.6356	1.8458
8.28	2.5085	1.7439
8.285	2.5189	1.7668
8.29	2.58	1.7333
8.295	2.4127	1.7048
8.3	2.4971	1.7519
8.305	2.5854	1.8966
8.31	2.5711	1.8337
8.315	2.4065	1.7718
8.32	2.4748	1.7699
8.325	2.5114	1.8443
8.33	2.5261	1.7501
8.335	2.3031	1.6627
8.34	2.3577	1.7054
8.345	2.492	1.8992
8.35	2.5448	1.7979
8.355	2.5475	1.734
8.36	2.4952	1.7691
8.365	2.4472	1.7675
8.37	2.5408	1.7607
8.375	2.4631	1.7104
8.38	2.5363	1.8292
8.385	2.4009	1.7624
8.39	2.4252	1.7223
8.395	2.5575	1.7255
8.4	2.4691	1.7437
8.405	2.5465	1.864
8.41	2.4178	1.7753
8.415	2.4465	1.7043
8.42	2.4977	1.8631
8.425	2.4033	1.7495
8.43	2.4483	1.8113
8.435	2.3491	1.7959
8.44	2.3552	1.8354
8.445	2.4867	1.8187
8.45	2.4176	1.6455
8.455	2.436	1.7706
8.46	2.3013	1.6521
8.465	2.4691	1.8382
8.47	2.5306	1.8091
8.475	2.4654	1.8404
8.48	2.3826	1.725
8.485	2.5844	1.8421
8.49	2.4683	1.8566
8.495	2.4512	1.8175
8.5	2.5581	1.9038
8.505	2.4718	1.9266
8.51	2.4717	1.8918
8.515	2.4936	1.8786
8.52	2.4407	1.8416
8.525	2.653	2.0166
8.53	2.4523	1.8548
8.535	2.401	1.8326
8.54	2.5528	1.9221
8.545	2.3849	1.7818
8.55	2.5059	1.9616
8.555	2.4949	1.9434
8.56	2.4366	1.8729
8.565	2.4088	1.9029
8.57	2.49	1.9441
8.575	2.3664	1.8166
8.58	2.3523	1.8575
8.585	2.359	1.9055
8.59	2.2739	1.86
8.595	2.2648	1.7643
8.6	2.3018	1.8306
8.605	2.2163	1.7245
8.61	2.2367	1.8304
8.615	2.2752	1.825
8.62	2.3274	1.8732
8.625	2.4232	1.954
8.63	2.3793	1.7994
8.635	2.4618	1.8628
8.64	2.4992	1.9198
8.645	2.3967	1.8861
8.65	2.3034	1.7716
8.655	2.4893	1.9086
8.66	2.5071	1.9895
8.665	2.5245	1.9166
8.67	2.4621	1.9033
8.675	2.4423	1.8413
8.68	2.3585	1.8482
8.685	2.3827	1.8249
8.69	2.3808	1.8529
8.695	2.2944	1.8514
8.7	2.381	1.8113
8.705	2.383	1.8713
8.71	2.4717	1.914
8.715	2.4249	1.7607
8.72	2.5734	1.8859
8.725	2.4738	1.8351
8.73	2.5031	1.7201
8.735	2.5466	1.8142
8.74	2.6115	1.9167
8.745	2.5481	1.9303
8.75	2.4915	1.876
8.755	2.4935	1.8656
8.76	2.4755	1.8595
8.765	2.5008	1.9059
8.77	2.5713	1.8585
8.775	2.7426	1.9996
8.78	2.7623	1.994
8.785	2.6881	1.9349
8.79	2.676	2.0678
8.795	2.5916	1.8917
8.8	2.6298	1.9297
8.805	2.4724	1.8534
8.81	2.6087	1.9991
8.815	2.5778	1.942
8.82	2.5959	1.9798
8.825	2.7054	1.9585
8.83	2.6499	1.9933
8.835	2.5557	1.9013
8.84	2.6244	1.8737
8.845	2.6235	1.9786
8.85	2.5589	1.8092
8.855	2.51	1.8441
8.86	2.5336	1.8044
8.865	2.4204	1.8559
8.87	2.4729	1.8521
8.875	2.5218	1.8782
8.88	2.5198	1.8535
8.885	2.4972	1.8238
8.89	2.4725	1.9448
8.895	2.5761	1.9677
8.9	2.5755	1.8607
8.905	2.486	1.9124
8.91	2.5503	2.0033
8.915	2.3219	1.7112
8.92	2.5087	1.9641
8.925	2.5302	1.9581
8.93	2.4729	1.9486
8.935	2.5034	1.9786
8.94	2.5688	1.976
8.945	2.628	1.9552
8.95	2.59	1.9284
8.955	2.4701	1.8117
8.96	2.5222	1.8557
8.965	2.4244	1.7867
8.97	2.5491	1.8641
8.975	2.6649	1.884
8.98	2.5458	1.8937
8.985	2.5684	1.8378
8.99	2.6811	1.879
8.995	2.5674	1.8083
9	2.6473	1.7972
9.005	2.6393	1.7922
9.01	2.5953	1.8082
9.015	2.5788	1.7732
9.02	2.576	1.8054
9.025	2.5807	1.7472
9.03	2.5908	1.7424
9.035	2.4596	1.7784
9.04	2.5134	1.7035
9.045	2.6237	1.8091
9.05	2.6428	1.8059
9.055	2.6023	1.7895
9.06	2.5169	1.7924
9.065	2.5444	1.7507
9.07	2.545	1.8937
9.075	2.4463	1.8462
9.08	2.5243	1.9096
9.085	2.5045	1.9438
9.09	2.5062	1.9521
9.095	2.5226	1.9389
9.1	2.5859	1.9241
9.105	2.6431	2.0865
9.11	2.5271	1.9839
9.115	2.6311	1.9108
9.12	2.6342	2.0158
9.125	2.5253	1.9479
9.13	2.4599	1.8757
9.135	2.3521	1.8269
9.14	2.4608	1.8345
9.145	2.3991	1.8109
9.15	2.3147	1.7132
9.155	2.2715	1.7916
9.16	2.3752	1.8629
9.165	2.2709	1.8082
9.17	2.3854	1.9029
9.175	2.4579	1.8649
9.18	2.3314	1.8309
9.185	2.4177	1.8578
9.19	2.4005	1.8219
9.195	2.3541	1.7605
9.2	2.4133	1.7493
9.205	2.3487	1.7902
9.21	2.3322	1.7141
9.215	2.2604	1.7018
9.22	2.3311	1.8141
9.225	2.4318	1.881
9.23	2.3898	1.8278
9.235	2.5135	1.9123
9.24	2.4881	1.896
9.245	2.4582	1.8788
9.25	2.4411	1.9559
9.255	2.4855	1.8909
9.26	2.5358	1.9434
9.265	2.5226	1.8906
9.27	2.4629	1.9046
9.275	2.3246	1.7277
9.28	2.3155	1.7991
9.285	2.3814	1.8503
9.29	2.3018	1.7461
9.295	2.3337	1.7509
9.3	2.3659	1.7011
9.305	2.3997	1.7681
9.31	2.3768	1.7619
9.315	2.4916	1.7312
9.32	2.2652	1.7732
9.325	2.3967	1.8783
9.33	2.2718	1.8217
9.335	2.3735	1.8611
9.34	2.4536	1.9059
9.345	2.442	1.8268
9.35	2.3168	1.7629
9.355	2.4513	1.87
9.36	2.3332	1.8706
9.365	2.3281	1.938
9.37	2.3553	1.9788
9.375	2.2698	1.9058
9.38	2.3316	1.9224
9.385	2.3965	1.9678
9.39	2.3508	1.9568
9.395	2.3973	2.0188
9.4	2.418	2.0275
9.405	2.4428	1.9299
9.41	2.3942	1.8442
9.415	2.332	1.7854
9.42	2.4538	1.9166
9.425	2.4631	1.9675
9.43	2.4738	1.9712
9.435	2.3926	1.9002
9.44	2.3886	1.9232
9.445	2.4192	1.8372
9.45	2.3652	1.8454
9.455	2.4424	1.8979
9.46	2.2584	1.8237
9.465	2.3156	1.8514
9.47	2.2806	1.8394
9.475	2.2644	1.8385
9.48	2.3439	1.9398
9.485	2.3096	1.8452
9.49	2.3417	1.8281
9.495	2.4055	1.9253
9.5	2.4307	1.8922
9.505	2.4648	1.9533
9.51	2.4327	1.8694
9.515	2.339	1.8296
9.52	2.4036	1.8657
9.525	2.4125	1.8459
9.53	2.2928	1.8805
9.535	2.2698	1.7988
9.54	2.3722	1.8945
9.545	2.5036	1.8826
9.55	2.4929	1.9233
9.555	2.4107	1.8752
9.56	2.4368	1.8011
9.565	2.4935	1.9762
9.57	2.4553	1.8664
9.575	2.3619	1.9153
9.58	2.3076	1.855
9.585	2.4283	1.9089
9.59	2.3965	1.9237
9.595	2.4858	1.9465
9.6	2.4457	1.9076
9.605	2.364	1.8595
9.61	2.4018	1.9342
9.615	2.3012	1.8248
9.62	2.2837	1.8846
9.625	2.1717	1.695
9.63	2.1821	1.8192
9.635	2.2212	1.8418
9.64	2.2996	1.8662
9.645	2.2311	1.8848
9.65	2.1865	1.8432
9.655	2.3076	1.8695
9.66	2.2135	1.7742
9.665	2.2343	1.7917
9.67	2.163	1.7474
9.675	2.1673	1.7363
9.68	2.2118	1.8328
9.685	2.2217	1.6654
9.69	2.2668	1.7516
9.695	2.2119	1.7953
9.7	2.2814	1.8262
9.705	2.2288	1.7106
9.71	2.2696	1.8061
9.715	2.2531	1.7693
9.72	2.2879	1.7017
9.725	2.239	1.7336
9.73	2.1997	1.8052
9.735	2.3077	1.7586
9.74	2.207	1.7346
9.745	2.3974	1.9071
9.75	2.3821	1.785
9.755	2.3873	1.8135
9.76	2.309	1.689
9.765	2.2211	1.7097
9.77	2.2924	1.8169
9.775	2.3575	1.7155
9.78	2.4429	1.896
9.785	2.4144	1.8095
9.79	2.444	1.9077
9.795	2.2716	1.8096
9.8	2.2694	1.747
9.805	2.2979	1.7798
9.81	2.2817	1.7712
9.815	2.3511	1.7946
9.82	2.3297	1.8241
9.825	2.3531	1.8254
9.83	2.3164	1.821
9.835	2.3407	1.7611
9.84	2.3261	1.8193
9.845	2.3636	1.7244
9.85	2.2522	1.7225
9.855	2.2593	1.7957
9.86	2.1911	1.7156
9.865	2.1781	1.7368
9.87	2.1393	1.7584
9.875	2.1563	1.6905
9.88	2.1275	1.7083
9.885	2.151	1.7078
9.89	2.3016	1.8757
9.895	2.2235	1.7947
9.9	2.1821	1.8286
9.905	2.1878	1.7647
9.91	2.2558	1.8177
9.915	2.2435	1.7836
9.92	2.1243	1.7511
9.925	2.2643	1.7733
9.93	2.2833	1.8652
9.935	2.182	1.8311
9.94	2.1499	1.8284
9.945	2.1369	1.7504
9.95	2.1299	1.7505
9.955	2.2168	1.7617
9.96	2.2476	1.7717
9.965	2.3071	1.7305
9.97	2.3419	1.7746
9.975	2.22	1.6728
9.98	2.1723	1.6734
9.985	2.1271	1.5736
9.99	2.175	1.7042
9.995	2.3042	1.6953
[truncated: 35,955 more rows]
