# Supplementary material for: Structure and physiological function of the human KCNQ1 channel voltage sensor intermediate state
Source: eLife. 2020 Feb 25;9:e53901. doi: 10.7554/eLife.53901 (PMC7069725; doi:10.7554/eLife.53901)
Supplement: Figure 5—figure supplement 1—source data 1. [file elife-53901-fig5-figsupp1-data1.xlsx]

## Sheet: SFigure 5
Panel A	GV fit F0R	w/o KCNE1	Panel B	GV fit F0R/D202N	w/o KCNE1	Panel C	GV fit F0R/Q3E	w/o KCNE1	Panel D	GV fit F0R/R4E	w/o KCNE1	Panel E	GV fit F0R/H5E	w/o KCNE1					Panel F	F0R XE991 inh. bar plot individual data points	Panel G	F00/D202N XE991 inh. bar plot individual data points	Panel H	F0R/Q3E XE991 inh. bar plot individual data points	Panel I	F0R/R4E XE991 inh. bar plot individual data points	Panel J	F0R/H5E XE991 inh. bar plot individual data points
Voltage	Gnorm	SEM	Voltage	Gnorm	SEM	Voltage	Gnorm	SEM	Voltage	Gnorm	SEM	Voltage	Gnorm	SEM					Cell #	XE inhibition fraction	Cell #	XE inhibition fraction	Cell #	XE inhibition fraction	Cell #	XE inhibition fraction	Cell #	XE inhibition fraction
-120	0	0	-120	0.339309	0.0404961	-120	0	0	-120	0.0177345	0.00638467	-120	0.00248613	0.00248613					Cell 1	0.340278	Cell 1	0.935743	Cell 1	0.773973	Cell 1	0.00332781	Cell 1	0.118299
-110	0.162325	0.0328579	-110	0.526021	0.0425707	-110	0.186902	0.0294729	-110	0.0321146	0.00930051	-110	0.0110651	0.0072609					Cell 2	0.114865	Cell 2	0.902128	Cell 2	0.701271	Cell 2	0.0905433	Cell 2	0.161392
-100	0.422128	0.0560124	-100	0.693006	0.0338216	-100	0.418761	0.0445447	-100	0.085513	0.0187631	-100	0.0583279	0.00868842					Cell 3	0.314501	Cell 3	0.835095	Cell 3	0.736559	Cell 3	0.122807	Cell 3	0.197183
-90	0.724783	0.0612952	-90	0.825958	0.0222082	-90	0.620679	0.0525086	-90	0.138227	0.0255059	-90	0.160316	0.0127956							Cell 4	0.828413	Cell 4	0.736196	Cell 4	0.590288	Cell 4	0.264228
-80	0.915768	0.0285491	-80	0.917484	0.0126129	-80	0.783134	0.0496838	-80	0.208852	0.0327096	-80	0.345092	0.00493898									Cell 5	0.773109	Cell 5	0.573923
-70	0.996814	0.00318607	-70	0.972334	0.00641601	-70	0.893234	0.0424369	-70	0.329025	0.0413997	-70	0.563744	0.0213798									Cell 6	0.785971
-60	0.977519	0.0162331	-60	0.996369	0.00100085	-60	0.956826	0.0264345	-60	0.471069	0.0415671	-60	0.75752	0.0323459									Cell 7	0.694915
			-50	1	0	-50	0.973954	0.011857	-50	0.621935	0.0395722	-50	0.899006	0.0316512									Cell 8	0.770833
			-40	0.99123	0.00151738	-40	0.955151	0.010667	-40	0.768041	0.0303351	-40	0.96062	0.0199445
									-30	0.864907	0.0243611	-30	0.977596	0.0149364
									-20	0.936558	0.0156348	-20	0.971178	0.0222945
									-10	0.970853	0.0112694	-10	0.975139	0.014129
									0	0.981186	0.00743552	0	0.964864	0.0104455
									10	0.983366	0.00710476	10	0.955914	0.0176243
									20	0.996777	0.00247158	20	0.96301	0.0257423
												30	0.953666	0.0290393
Panel A	GV fit F0R	w/ KCNE1	Panel B	GV fit F0R/D202N	w/ KCNE1	Panel C	GV fit F0R/Q3E	w/ KCNE1	Panel D	GV fit F0R/R4E	w/ KCNE1	Panel E	GV fit F0R/H5E	w/ KCNE1
Voltage	Gnorm	SEM	Voltage	Gnorm	SEM	Voltage	Gnorm	SEM	Voltage	Gnorm	SEM	Voltage	Gnorm	SEM
-120	0.0183028	0.00436103	-120			-120	0.0266578	0.00898011	-120	0.0198758	0.00796541	-120	0.0108986	0.00322428
-110	0.0180213	0.0012155	-110			-110	0.00857788	0.00146928	-110	0.0162535	0.00725213	-110	0.00950853	0.00381394
-100	0.0143069	0.0041024	-100	0.0103209	0.00291237	-100	0.0058022	0.0039854	-100	0.0159908	0.00665153	-100	0.00756056	0.00384498
-90	0.0102075	0.00174487	-90	0.00673672	0.00247587	-90	0.00769376	0.00750512	-90	0.0203813	0.00528585	-90	0.0121409	0.00626903
-80	0.00624774	0.00289399	-80	0.0181946	0.00195687	-80	0.00617778	0.00334781	-80	0.026178	0.00681651	-80	0.00933079	0.00415916
-70	0.00256318	0.00105341	-70	0.0121298	0.00458943	-70	0.00691617	0.0038099	-70	0.0287769	0.00491158	-70	0.0144756	0.00570942
-60	0.00783707	0.0030649	-60	0.0140605	0.00397567	-60	0.011045	0.00698402	-60	0.0467307	0.00709652	-60	0.0175503	0.00416129
-50	0.00499679	0.00130859	-50	0.0122645	0.0039554	-50	0.0285749	0.00278066	-50	0.0657367	0.00847812	-50	0.0279163	0.00717163
-40	0.00285204	0.00151747	-40	0.0211791	0.00396115	-40	0.0260637	0.00439363	-40	0.102228	0.0131153	-40	0.0566428	0.00948156
-30	0.0105505	0.00174369	-30	0.0255262	0.00479734	-30	0.0406873	0.00468203	-30	0.156407	0.0149711	-30	0.0920317	0.0128829
-20	0.0268284	0.00304804	-20	0.018437	0.00503789	-20	0.0474996	0.00576073	-20	0.242639	0.0192308	-20	0.200029	0.0218688
-10	0.0528077	0.00513358	-10	0.0461246	0.00456584	-10	0.0685951	0.0124857	-10	0.331933	0.0203534	-10	0.290079	0.0237742
0	0.0951275	0.00760526	0	0.0744496	0.00939074	0	0.103105	0.0102045	0	0.451987	0.0210871	0	0.449024	0.0276808
10	0.16978	0.0147679	10	0.130099	0.0140201	10	0.132405	0.0173433	10	0.552517	0.0209763	10	0.549506	0.0305859
20	0.265517	0.0249942	20	0.222144	0.0212362	20	0.183201	0.0182427	20	0.65257	0.0195701	20	0.679481	0.0262631
30	0.373468	0.0335434	30	0.351956	0.0244961	30	0.226283	0.0273326	30	0.742997	0.0203412	30	0.751704	0.0295707
40	0.497575	0.0344443	40	0.50332	0.031838	40	0.279397	0.0238193	40	0.816225	0.0167851	40	0.83992	0.0220798
50	0.606848	0.036391	50	0.660698	0.0301051	50	0.324616	0.0269878	50	0.884991	0.0188302	50	0.87856	0.0229812
60	0.710363	0.030802	60	0.82399	0.0296767	60	0.357796	0.0277001	60	0.930517	0.0133941	60	0.935121	0.0175658
70	0.798246	0.0273253	70	0.93614	0.0217702	70	0.397886	0.0307411	70	0.963107	0.010804	70	0.947555	0.0181982
80	0.868894	0.0239467	80	0.99	0.00999999	80	0.456133	0.0225902	80	0.97929	0.00541351	80	0.976402	0.0102173
90	0.918921	0.0191237	90	0.979907	0.0167408	90	0.51402	0.025594	90	0.982004	0.00415381	90	0.978371	0.00801329
100	0.954226	0.0144549	100			100	0.573631	0.0170322	100	0.978564	0.00801102	100	0.971491	0.00807998
110	0.976945	0.00812825	110			110	0.647144	0.0146922	110	0.940441	0.023642	110	0.97755	0.00465155
120	0.995027	0.00318332	120			120	0.72	0	120	0.922816	0.0275424	120	0.945715	0.035853
