# Supplementary material for: Structure and physiological function of the human KCNQ1 channel voltage sensor intermediate state
Source: eLife. 2020 Feb 25;9:e53901. doi: 10.7554/eLife.53901 (PMC7069725; doi:10.7554/eLife.53901)
Supplement: Figure 5—source data 1. [file elife-53901-fig5-data1.xlsx]

## Sheet: Figure5
Panel F	E2R/R4E avg IV curve				Panel G	F0R/Q3E/D202N avg IV curve				Panel G	F0R/H5E/D202N avg IV curve
Voltage	Current + KCNE1	SEM	Current -KCNE1	SEM	Voltage	Current + KCNE1	SEM	Current -KCNE1	SEM	Voltage	Current + KCNE1	SEM	Current -KCNE1	SEM
-120	-0.07375	0.0235228	-0.584375	0.0701909	-120	-0.1775	0.125376	-1.6125	0.371924	-120	-1.81198	0.383436	-0.425	0.0971133
-110	-0.051875	0.0136431	-0.37875	0.0549094	-110	-0.045625	0.0281007	-0.886875	0.219319	-110	-1.3125	0.297291	-0.305729	0.0672585
-100	-0.013125	0.0197741	-0.233125	0.0386111	-100	-0.0025	0.00620295	-0.248125	0.101851	-100	-0.686458	0.213673	-0.201563	0.0461736
-90	-0.004375	0.0215285	-0.088125	0.0258715	-90	0.046875	0.00726184	0.356875	0.11359	-90	0.075	0.159752	-0.119271	0.0304525
-80	0.021875	0.0187239	0.043125	0.0233101	-80	0.079375	0.0127934	0.910625	0.228513	-80	0.958854	0.180443	-0.0390625	0.0227754
-70	0.04	0.00960143	0.155625	0.0235808	-70	0.113125	0.0110662	1.44375	0.340431	-70	1.92708	0.275422	0.0276042	0.0175003
-60	0.05625	0.0167996	0.29375	0.0274574	-60	0.136875	0.0145035	1.93625	0.448266	-60	2.97656	0.398919	0.101042	0.0173368
-50	0.06875	0.0155624	0.385625	0.0356935	-50	0.1725	0.0234146	2.38688	0.550152	-50	4.08177	0.533477	0.175	0.0201718
-40	0.089375	0.0122075	0.50875	0.0415684	-40	0.20375	0.0215013	2.82125	0.639143	-40	5.20365	0.673058	0.251562	0.0309648
-30	0.0875	0.0100293	0.591875	0.055618	-30	0.245	0.0270019	3.23813	0.733494	-30	6.33333	0.811636	0.329687	0.0348242
-20	0.115625	0.00632764	0.7025	0.0698729	-20	0.28625	0.0279613	3.63375	0.819277	-20	7.43177	0.945199	0.400521	0.045159
-10	0.145	0.00736864	0.79	0.0791705	-10	0.33	0.0308822	4.01375	0.893806	-10	8.47448	1.07066	0.49375	0.0548376
0	0.179375	0.0072349	0.908125	0.0916249	0	0.410625	0.0219552	4.3925	0.958224	0	9.44115	1.17902	0.566667	0.0607069
10	0.23625	0.0130579	1.00375	0.101941	10	0.498125	0.0239139	4.69062	1.03316	10	10.2896	1.27685	0.644792	0.0706354
20	0.276875	0.0180764	1.07938	0.112745	20	0.62875	0.0254913	4.9975	1.09396	20	11.0135	1.35757	0.731771	0.0827365
30	0.339375	0.0256669	1.17813	0.114598	30	0.763125	0.0266524	5.2575	1.14848	30	11.5552	1.41331	0.814063	0.0799485
40	0.374375	0.0237253	1.25438	0.120621	40	0.901875	0.0260633	5.46562	1.18039	40	11.9109	1.44493	0.874479	0.0907808
50	0.435	0.0376352	1.33437	0.124016	50	0.99125	0.030625	5.54688	1.19125	50	12.063	1.46192	0.911979	0.10124
60	0.48875	0.0516581	1.51938	0.142101	60	1.11625	0.0425092	5.59375	1.20023	60	12.049	1.45936	0.922917	0.11449
