# Supplementary material for: Structure and physiological function of the human KCNQ1 channel voltage sensor intermediate state
Source: eLife. 2020 Feb 25;9:e53901. doi: 10.7554/eLife.53901 (PMC7069725; doi:10.7554/eLife.53901)
Supplement: Figure 6—source data 1. [file elife-53901-fig6-data1.xlsx]

## Sheet: Figure6
Panel D	E2R/R4E XE991 inh. bar plot individual data points	Panel G	F0R/Q3E/D202N XE991 inh. bar plot individual data points	Panel J	F0R/H5E/D202N XE991 inh bar plot individual data points
Cell #	XE inhibition fraction	Cell #	XE inhibition fraction	Cell #	XE inhibition fraction
Cell 1	0.871508	Cell 1	0.653338	Cell 1	0.182432
Cell 2	0.836601	Cell 2	0.684667	Cell 2	0.267081
Cell 3	0.866667	Cell 3	0.697951	Cell 3	0.0550458
Cell 4	0.861607	Cell 4	0.870413	Cell 4	0.151786
Cell 5	0.795833	Cell 5	0.743954	Cell 5	0.194946
Cell 6	0.787975	Cell 6	0.780771	Cell 6	0.210227
