# Supplementary material for: Structure and physiological function of the human KCNQ1 channel voltage sensor intermediate state
Source: eLife. 2020 Feb 25;9:e53901. doi: 10.7554/eLife.53901 (PMC7069725; doi:10.7554/eLife.53901)
Supplement: Figure 7—source data 1. [file elife-53901-fig7-data1.xlsx]

## Sheet: Figure7
Panel A	KCNQ1 GV			KCNQ1 FV			KCNQ1+KCNE1 GV			KCNQ1+KCNE1 FV			KCNQ1+KCNE3 GV			KCNQ1+KCNE3 FV			Panel B	F351A+KCNE3 GV			F351A+KCNE3 FV			F351A GV			Panel C	KCNQ1+KCNE3 GV1			KCNQ1+KCNE3 GV2			Panel E	KCNQ1 time dependent block			KCNQ1+KCNE1 time dependent block			KCNQ1+KCNE3 time dependent block
Voltage	Conductance	SEM	Voltage	Fluorescence	SEM	Voltage	Conductance	SEM	Voltage	Fluorescence	SEM	Voltage	Conductance	SEM	Voltage	Fluorescence	SEM		Voltage	Conductance	SEM	Voltage	Fluorescence	SEM	Voltage	Conductance	SEM		Voltage	Conductance	SEM	Voltage	Conductance	SEM		Time (s)	Ratio IXE/Icontrol	SEM	Time (s)	Ratio IXE/Icontrol	SEM	Time (s)	Ratio IXE/Icontrol	SEM
			120	1	0	100	1	0	100	1	0.0125	80	1	0.0030984	80	0.9752	0.0432		120	0.9906	0	120	1	0	120	0.9148	0		-160	0.493	0.0442	-80	0.0772	4.3903e-10		0	-3.1806	2.4054	0	1.1212	0.1637	0	0.4612	0.0835
			100	0.9784	0.0035508	80	0.914	0.0139	80	0.9582	0.0286	60	0.9343	0.01	60	0.9509	0.0306		100	0.76	0.0068836	100	0.9463	0.0069237	100	0.7773	0.0178		-140	0.6197	0.0212	-60	0.0717	0.0159		0.001	1.035	0.0377	0.001	0.9982	0.0095321	0.002	0.8315	0.0789
80	0.9203	0.0124	80	0.9366	0.0031881	60	0.7903	0.0084314	60	0.9386	0.0414	40	0.9374	0.0203	40	0.8746	0.0905		80	0.61	0.0091826	80	0.8536	0.0080854	80	0.6369	0.028		-120	0.721	0.0389	-40	0.1587	0.0396		0.002	1.0022	0.0092003	0.002	1.0094	0.0033165	0.004	0.7559	0.1163
60	0.9183	0.0092419	60	0.9078	0.0049174	40	0.6303	0.0046797	40	0.8514	0.0381	20	0.9371	0.0274	20	0.8153	0.0276		60	0.38	0.0077115	60	0.77	0.0146	60	0.4954	0.0302		-100	0.8066	0.0369	-20	0.3479	0.0599		0.003	0.9882	0.0108	0.003	1.0178	0.0046107	0.006	0.5506	0.0407
40	0.9387	0.0090843	40	0.8684	0.0068776	20	0.4208	0.0121	20	0.8189	0.0261	0	0.9222	0.0307	0	0.7153	0.0688		40	0.2393	0.0051746	40	0.6836	0.0107	40	0.3345	0.0225		-80	0.8709	0.0271	0	0.5846	0.0602		0.004	0.9243	0.0232	0.004	1.0327	0.0098191	0.008	0.5209	0.0331
20	0.9739	0.0129	20	0.8207	0.0086248	0	0.2066	0.0224	0	0.742	0.0325	-20	0.9104	0.0331	-20	0.6496	0.0406		20	0.1126	0.0016704	20	0.6193	0.0073819	20	0.1652	0.0116		-60	0.9124	0.0173	20	0.7996	0.0426		0.005	0.7872	0.0505	0.005	0.7867	0.0734	0.01	0.499	0.023
0	1	0.014	0	0.7672	0.0108	-20	0.0711	0.0143	-20	0.701	0.0251	-40	0.9041	0.0351	-40	0.6035	0.0813		0	0.038	0.0014894	0	0.541	0.0093605	0	0.0512	0.0031983		-40	0.9493	0.0146	40	0.9374	0.0209		0.006	0.8279	0.039	0.006	0.9626	0.024	0.012	0.4614	0.0252
-20	0.9373	0.0135	-20	0.6664	0.011	-40	0.0222	0.0049722	-40	0.6148	0.0585	-60	0.9023	0.0372	-60	0.4738	0.0654		-20	0.0088457	0.00086487	-20	0.5075	0.0081277	-20	0.0197	0.0027307		-20	0.979	0.0056634	60	0.9749	0.0055882		0.007	0.8175	0.0353	0.007	0.9452	0.0202	0.014	0.4284	0.0235
-40	0.7348	0.0156	-40	0.4908	0.0092177	-60	0.0101	0.0018183	-60	0.5351	0.045	-80	0.8991	0.0392	-80	0.3986	0.0739		-40	0.0024664	0.00065493	-40	0.5	0.0093267	-40	0.0138	0.0024497		0	0.9974	0.0034776	80	0.9731	0.0024907		0.008	0.7944	0.0371	0.008	0.926	0.018	0.016	0.4348	0.0246
-60	0.445	0.0196	-60	0.2414	0.0038446	-80	0.0069334	0.0015901	-80	0.443	0	-100	0.8878	0.0409	-100	0.4013	0.0461		-60	-4.3212e-05	0.00061061	-60	0.4554	0.0117	-60	0.0118	0.0020579		20	0.9906	0.0123					0.009	0.7824	0.0379	0.009	0.9004	0.0216	0.018	0.4397	0.0241
-80	0.2898	0.0178	-80	0.0691	0	-100	0.0052188	0.0019549	-100	0.3148	0.0399	-120	0.8415	0.0425	-120	0.287	0.0696		-80	-0.0013854	0.00059305	-80	0.4129	0	-80	0.0113	0.0019668		40	0.9639	0.0313					0.01	0.7669	0.0376	0.01	0.9066	0.0228	0.02	0.4425	0.0253
-100	0.2252	0.0151	-100	-1.5166e-05	0.0033808	-120	0.0037417	0.0026577	-120	0.1862	0.073	-140	0.8041	0.0446	-140	0.1953	0.0602		-100	-0.00091209	0.00060724	-100	0.323	0.0095907	-100	0.0121	0.00128		60	0.9309	0.0615					0.011	0.7511	0.0407	0.011	0.9331	0.0171	0.022	0.4349	0.0227
-120	0.1961	0.0135	-120	-0.0054505	0.0040507	-140	7.0419e-06	0.0063958	-140	0.0988	0.0747	-160	0.7135	0.0534	-160	0	0.0994		-120	0.0069883	0.0011245	-120	0.256	0.0096326												0.012	0.7417	0.04	0.012	0.9458	0.0269	0.024	0.4341	0.0225
-140	0.1889	0.0133	-140	-0.0169	0.0057497																															0.013	0.7248	0.0394	0.013	0.9296	0.0229	0.026	0.432	0.0222
																																				0.014	0.7262	0.0385	0.014	0.8828	0.0148	0.028	0.4344	0.0234
																																				0.015	0.7098	0.0399	0.015	0.9225	0.017	0.03	0.4376	0.021
																																				0.016	0.6905	0.0392	0.016	0.8804	0.0189	0.032	0.4432	0.0241
																																				0.017	0.6829	0.0378	0.017	0.8996	0.0179	0.034	0.4381	0.0213
																																				0.018	0.6754	0.0365	0.018	0.9386	0.0275	0.036	0.4426	0.0204
																																				0.019	0.6699	0.0365	0.019	0.9107	0.0168	0.038	0.4355	0.018
																																				0.02	0.6558	0.0357	0.02	0.9133	0.0222	0.04	0.4409	0.0199
																																				0.021	0.6473	0.0349	0.021	0.8871	0.0090546	0.042	0.4459	0.0183
																																				0.022	0.6354	0.0352	0.022	0.8893	0.0186	0.044	0.4519	0.0218
																																				0.023	0.631	0.0359	0.023	0.916	0.0199	0.046	0.444	0.0187
																																				0.024	0.6228	0.0343	0.024	0.9049	0.0173	0.048	0.4547	0.0218
																																				0.025	0.614	0.0329	0.025	0.8875	0.0138	0.05	0.4376	0.0194
																																				0.026	0.6067	0.0342	0.026	0.8758	0.0236	0.052	0.4353	0.0224
																																				0.027	0.598	0.0331	0.027	0.8891	0.0174	0.054	0.4306	0.0221
																																				0.028	0.596	0.0339	0.028	0.9017	0.0201	0.056	0.4379	0.0224
																																				0.029	0.5866	0.0327	0.029	0.9386	0.0216	0.058	0.4303	0.021
																																				0.03	0.5843	0.0311	0.03	0.9176	0.0216	0.06	0.4267	0.0208
																																				0.031	0.5774	0.0308	0.031	0.89	0.0205	0.062	0.4347	0.0221
																																				0.032	0.5729	0.0298	0.032	0.8643	0.0191	0.064	0.4446	0.0225
																																				0.033	0.567	0.0306	0.033	0.923	0.0201	0.066	0.4257	0.0198
																																				0.034	0.5615	0.0306	0.034	0.9182	0.0253	0.068	0.4406	0.0233
																																				0.035	0.5575	0.0305	0.035	0.9005	0.0192	0.07	0.4469	0.0266
																																				0.036	0.5558	0.0292	0.036	0.8806	0.021	0.072	0.4402	0.0227
																																				0.037	0.5482	0.0276	0.037	0.8605	0.0163	0.074	0.4382	0.0217
																																				0.038	0.5482	0.0292	0.038	0.8752	0.0201	0.076	0.4454	0.0209
																																				0.039	0.5421	0.0289	0.039	0.9092	0.0232	0.078	0.4388	0.0179
																																				0.04	0.5391	0.0284	0.04	0.8959	0.0222	0.08	0.4374	0.0171
																																				0.041	0.5354	0.0281	0.041	0.8855	0.018	0.082	0.4459	0.0192
																																				0.042	0.5339	0.0274	0.042	0.89	0.0225	0.084	0.4418	0.0206
																																				0.043	0.5307	0.0272	0.043	0.8904	0.015	0.086	0.4374	0.0232
																																				0.044	0.5288	0.0272	0.044	0.8922	0.0213	0.088	0.4384	0.0219
																																				0.045	0.5272	0.0269	0.045	0.8961	0.0255	0.09	0.4417	0.0224
																																				0.046	0.5264	0.0272	0.046	0.9107	0.0221	0.092	0.4291	0.0188
																																				0.047	0.5223	0.0261	0.047	0.8861	0.016	0.094	0.4407	0.0223
																																				0.048	0.5221	0.0263	0.048	0.8693	0.0172	0.096	0.4327	0.0207
																																				0.049	0.5185	0.0266	0.049	0.8744	0.0273	0.098	0.4398	0.0209
																																				0.05	0.5179	0.0263	0.05	0.873	0.0241	0.1	0.4395	0.0195
																																				0.051	0.5157	0.0256	0.051	0.8914	0.0208	0.102	0.4429	0.0198
																																				0.052	0.5144	0.0247	0.052	0.8898	0.0184	0.104	0.4457	0.0205
																																				0.053	0.5126	0.0246	0.053	0.864	0.0225	0.106	0.4416	0.0206
																																				0.054	0.5134	0.0245	0.054	0.8923	0.0196	0.108	0.4369	0.021
																																				0.055	0.5089	0.0254	0.055	0.8894	0.0188	0.11	0.4404	0.022
																																				0.056	0.5077	0.0247	0.056	0.8933	0.0233	0.112	0.4295	0.0174
																																				0.057	0.5077	0.0247	0.057	0.8926	0.0234	0.114	0.4307	0.0168
																																				0.058	0.506	0.0246	0.058	0.8882	0.0165	0.116	0.4391	0.0206
																																				0.059	0.5053	0.0237	0.059	0.871	0.0246	0.118	0.4369	0.0197
																																				0.06	0.5034	0.0238	0.06	0.8957	0.0174	0.12	0.4331	0.0191
																																				0.061	0.5044	0.0242	0.061	0.8853	0.0229	0.122	0.437	0.0216
																																				0.062	0.5048	0.0246	0.062	0.901	0.0273	0.124	0.4323	0.0211
																																				0.063	0.5039	0.0243	0.063	0.8909	0.0228	0.126	0.4354	0.024
																																				0.064	0.504	0.0235	0.064	0.8815	0.0234	0.128	0.4284	0.0191
																																				0.065	0.5027	0.0236	0.065	0.8963	0.0207	0.13	0.4335	0.0208
																																				0.066	0.4988	0.0235	0.066	0.8841	0.0193	0.132	0.4309	0.0226
																																				0.067	0.4996	0.0239	0.067	0.8986	0.028	0.134	0.433	0.0231
																																				0.068	0.4975	0.0225	0.068	0.8964	0.0246	0.136	0.4369	0.0239
																																				0.069	0.5014	0.0229	0.069	0.8817	0.0147	0.138	0.4293	0.0205
																																				0.07	0.4977	0.0221	0.07	0.8686	0.0222	0.14	0.4428	0.0218
																																				0.071	0.4982	0.0221	0.071	0.8665	0.0205	0.142	0.4409	0.0207
																																				0.072	0.4989	0.0227	0.072	0.8623	0.0237	0.144	0.4496	0.0241
																																				0.073	0.4979	0.0227	0.073	0.8831	0.0186	0.146	0.437	0.0197
																																				0.074	0.4974	0.0224	0.074	0.8891	0.023	0.148	0.4434	0.0209
																																				0.075	0.4954	0.0218	0.075	0.8716	0.0153	0.15	0.4411	0.0217
																																				0.076	0.4961	0.0222	0.076	0.8747	0.0204	0.152	0.4335	0.0224
																																				0.077	0.4943	0.0223	0.077	0.8871	0.0256	0.154	0.4321	0.0228
																																				0.078	0.4957	0.0225	0.078	0.8876	0.0272	0.156	0.4301	0.0216
																																				0.079	0.4968	0.0227	0.079	0.9105	0.0268	0.158	0.4414	0.0201
																																				0.08	0.4956	0.0221	0.08	0.8791	0.0261	0.16	0.4389	0.0167
																																				0.081	0.4968	0.0219	0.081	0.8534	0.0206	0.162	0.4487	0.0186
																																				0.082	0.4955	0.0216	0.082	0.8639	0.0239	0.164	0.4344	0.0169
																																				0.083	0.4942	0.0219	0.083	0.8878	0.023	0.166	0.4389	0.022
																																				0.084	0.4941	0.0213	0.084	0.9159	0.0256	0.168	0.4335	0.0216
																																				0.085	0.4944	0.0209	0.085	0.882	0.0216	0.17	0.4335	0.0204
																																				0.086	0.4949	0.0216	0.086	0.8867	0.0208	0.172	0.4309	0.0187
																																				0.087	0.4938	0.0208	0.087	0.8787	0.0263	0.174	0.4306	0.0207
																																				0.088	0.4941	0.0213	0.088	0.8854	0.0225	0.176	0.4164	0.0198
																																				0.089	0.4928	0.0215	0.089	0.8819	0.0277	0.178	0.4324	0.0247
																																				0.09	0.4927	0.0213	0.09	0.894	0.0221	0.18	0.4333	0.023
																																				0.091	0.4938	0.0208	0.091	0.8688	0.021	0.182	0.4371	0.0212
																																				0.092	0.4934	0.0206	0.092	0.8903	0.0254	0.184	0.44	0.0193
																																				0.093	0.4924	0.0205	0.093	0.8723	0.0283	0.186	0.449	0.0231
																																				0.094	0.4918	0.0205	0.094	0.8966	0.0239	0.188	0.4367	0.019
																																				0.095	0.4939	0.0212	0.095	0.9037	0.025	0.19	0.4438	0.0204
																																				0.096	0.4934	0.0212	0.096	0.891	0.031	0.192	0.4507	0.0218
																																				0.097	0.4925	0.0201	0.097	0.8692	0.0231	0.194	0.4407	0.0192
																																				0.098	0.4938	0.0207	0.098	0.8643	0.0245	0.196	0.4411	0.0201
																																				0.099	0.493	0.0206	0.099	0.8588	0.0238	0.198	0.4446	0.0204
																																				0.1	0.4932	0.0206	0.1	0.8782	0.0219	0.2	0.439	0.0185
																																				0.101	0.4915	0.0203	0.101	0.8671	0.0206	0.202	0.4437	0.0228
																																				0.102	0.4934	0.0207	0.102	0.8719	0.0208	0.204	0.438	0.0225
																																				0.103	0.4932	0.0202	0.103	0.8611	0.0209	0.206	0.4364	0.0196
																																				0.104	0.4926	0.0198	0.104	0.8665	0.0188	0.208	0.4488	0.0211
																																				0.105	0.4915	0.0205	0.105	0.8623	0.0205	0.21	0.4384	0.0176
																																				0.106	0.4918	0.02	0.106	0.8795	0.0325	0.212	0.4397	0.0176
																																				0.107	0.4936	0.0204	0.107	0.8977	0.0269	0.214	0.4337	0.0168
																																				0.108	0.492	0.0198	0.108	0.8749	0.0195	0.216	0.4343	0.0197
																																				0.109	0.4922	0.0199	0.109	0.8546	0.0245	0.218	0.4356	0.021
																																				0.11	0.4928	0.0199	0.11	0.8487	0.0233	0.22	0.4322	0.0212
																																				0.111	0.492	0.0197	0.111	0.8704	0.0233	0.222	0.4312	0.0225
																																				0.112	0.4944	0.0204	0.112	0.8933	0.0252	0.224	0.4324	0.0204
																																				0.113	0.4935	0.0201	0.113	0.8611	0.0247	0.226	0.4324	0.018
																																				0.114	0.4932	0.0196	0.114	0.8609	0.0237	0.228	0.4491	0.0203
																																				0.115	0.4939	0.0199	0.115	0.86	0.0246	0.23	0.4359	0.0194
																																				0.116	0.4922	0.0197	0.116	0.8649	0.0234	0.232	0.4435	0.0222
																																				0.117	0.4919	0.0196	0.117	0.8884	0.03	0.234	0.4378	0.0187
																																				0.118	0.4924	0.0194	0.118	0.8693	0.0253	0.236	0.4425	0.0182
																																				0.119	0.4926	0.0196	0.119	0.8536	0.0229	0.238	0.4413	0.0187
																																				0.12	0.4921	0.0192	0.12	0.8536	0.0261	0.24	0.4383	0.0192
																																				0.121	0.4923	0.0194	0.121	0.8446	0.0283	0.242	0.4449	0.0235
																																				0.122	0.4922	0.0193	0.122	0.8888	0.0277	0.244	0.4439	0.0248
																																				0.123	0.492	0.02	0.123	0.8745	0.0223	0.246	0.4369	0.0223
																																				0.124	0.4937	0.02	0.124	0.8734	0.0257	0.248	0.4387	0.0229
																																				0.125	0.4929	0.0192	0.125	0.8537	0.0222	0.25	0.4251	0.0204
																																				0.126	0.4928	0.0201	0.126	0.8562	0.0233	0.252	0.4233	0.02
																																				0.127	0.4927	0.02	0.127	0.8573	0.0197	0.254	0.4389	0.0211
																																				0.128	0.4936	0.0201	0.128	0.8765	0.0271	0.256	0.4391	0.0182
																																				0.129	0.4937	0.0199	0.129	0.8841	0.0257	0.258	0.435	0.0176
																																				0.13	0.4935	0.0195	0.13	0.8799	0.0273	0.26	0.4342	0.0199
																																				0.131	0.4938	0.0192	0.131	0.8535	0.0198	0.262	0.431	0.0204
																																				0.132	0.4925	0.0196	0.132	0.8436	0.0244	0.264	0.4343	0.0206
																																				0.133	0.4931	0.0195	0.133	0.8494	0.0233	0.266	0.4414	0.0212
																																				0.134	0.4927	0.0192	0.134	0.8648	0.0255	0.268	0.4398	0.02
																																				0.135	0.4936	0.0193	0.135	0.8762	0.0266	0.27	0.4468	0.0212
																																				0.136	0.4935	0.019	0.136	0.8604	0.0278	0.272	0.4528	0.0223
																																				0.137	0.493	0.0186	0.137	0.8247	0.0288	0.274	0.4475	0.02
																																				0.138	0.4934	0.0195	0.138	0.845	0.0276	0.276	0.4486	0.022
																																				0.139	0.4926	0.0194	0.139	0.8738	0.0258	0.278	0.4388	0.0214
																																				0.14	0.494	0.0195	0.14	0.8641	0.0272	0.28	0.4454	0.0233
																																				0.141	0.4936	0.0191	0.141	0.8585	0.0284	0.282	0.4402	0.0218
																																				0.142	0.4921	0.0187	0.142	0.8457	0.0264	0.284	0.4368	0.019
																																				0.143	0.4935	0.0193	0.143	0.8554	0.0219	0.286	0.4501	0.0208
																																				0.144	0.4919	0.0188	0.144	0.8325	0.0244	0.288	0.4446	0.0191
																																				0.145	0.4922	0.0191	0.145	0.8567	0.03	0.29	0.4438	0.0192
																																				0.146	0.4936	0.0194	0.146	0.8712	0.0236	0.292	0.4284	0.0172
																																				0.147	0.4936	0.019	0.147	0.8485	0.028	0.294	0.4383	0.0207
																																				0.148	0.4934	0.019	0.148	0.8429	0.0242	0.296	0.435	0.0182
																																				0.149	0.4943	0.0191	0.149	0.8353	0.0252	0.298	0.4395	0.0203
																																				0.15	0.4947	0.0194	0.15	0.8475	0.0287	0.3	0.4412	0.0208
																																				0.151	0.4934	0.0192	0.151	0.8785	0.025	0.302	0.4419	0.0223
																																				0.152	0.4939	0.0188	0.152	0.8402	0.0259	0.304	0.4451	0.0221
																																				0.153	0.4943	0.019	0.153	0.8283	0.0231	0.306	0.4397	0.0197
																																				0.154	0.4935	0.0188	0.154	0.8348	0.0209	0.308	0.4395	0.019
																																				0.155	0.4932	0.019	0.155	0.8334	0.0226	0.31	0.4493	0.0204
																																				0.156	0.4936	0.0194	0.156	0.837	0.0297	0.312	0.4438	0.0203
																																				0.157	0.4942	0.0192	0.157	0.845	0.0262	0.314	0.4417	0.023
																																				0.158	0.4939	0.0193	0.158	0.8477	0.0297	0.316	0.4243	0.017
																																				0.159	0.4948	0.0194	0.159	0.8375	0.0261	0.318	0.4408	0.0187
																																				0.16	0.4936	0.0193	0.16	0.8384	0.0222	0.32	0.4492	0.0208
																																				0.161	0.4945	0.0193	0.161	0.853	0.0228	0.322	0.4413	0.019
																																				0.162	0.4948	0.0195	0.162	0.8703	0.0289	0.324	0.4409	0.021
																																				0.163	0.4946	0.0192	0.163	0.8631	0.0294	0.326	0.4377	0.0204
																																				0.164	0.4955	0.0191	0.164	0.8405	0.0259	0.328	0.4411	0.0203
																																				0.165	0.4945	0.0192	0.165	0.8372	0.0246	0.33	0.4351	0.0179
																																				0.166	0.494	0.0196	0.166	0.8344	0.0269	0.332	0.4345	0.0197
																																				0.167	0.4953	0.0195	0.167	0.8501	0.0235	0.334	0.4297	0.02
																																				0.168	0.4946	0.0192	0.168	0.8516	0.0285	0.336	0.4312	0.0226
																																				0.169	0.4951	0.0189	0.169	0.8364	0.0284	0.338	0.4252	0.0207
																																				0.17	0.4954	0.019	0.17	0.8205	0.0259	0.34	0.4337	0.0232
																																				0.171	0.4935	0.0185	0.171	0.8234	0.0244	0.342	0.4318	0.0228
																																				0.172	0.4938	0.0192	0.172	0.8292	0.0246	0.344	0.4365	0.0217
																																				0.173	0.4945	0.0193	0.173	0.8393	0.0281	0.346	0.4357	0.0198
																																				0.174	0.4947	0.0192	0.174	0.8583	0.0308	0.348	0.4459	0.0205
																																				0.175	0.4937	0.0188	0.175	0.8245	0.0272	0.35	0.4355	0.0213
																																				0.176	0.4953	0.0187	0.176	0.8174	0.0261	0.352	0.4343	0.023
																																				0.177	0.4932	0.0193	0.177	0.8386	0.0257	0.354	0.4365	0.0203
																																				0.178	0.4952	0.0194	0.178	0.8518	0.0257	0.356	0.4358	0.0197
																																				0.179	0.4953	0.0192	0.179	0.8495	0.0318	0.358	0.43	0.019
																																				0.18	0.4959	0.0189	0.18	0.8344	0.0266	0.36	0.4366	0.0225
																																				0.181	0.4957	0.0187	0.181	0.8247	0.023	0.362	0.426	0.0181
																																				0.182	0.4961	0.0194	0.182	0.8293	0.0252	0.364	0.437	0.0178
																																				0.183	0.4947	0.0193	0.183	0.8398	0.0307	0.366	0.4416	0.018
																																				0.184	0.4951	0.019	0.184	0.8449	0.0246	0.368	0.4395	0.0197
																																				0.185	0.4949	0.0186	0.185	0.8436	0.0258	0.37	0.4361	0.0206
																																				0.186	0.4956	0.0192	0.186	0.8362	0.0277	0.372	0.437	0.0211
																																				0.187	0.4945	0.0186	0.187	0.8233	0.031	0.374	0.4362	0.0208
																																				0.188	0.495	0.0191	0.188	0.8206	0.0251	0.376	0.4443	0.0213
																																				0.189	0.4945	0.0192	0.189	0.8508	0.0315	0.378	0.4444	0.0236
																																				0.19	0.4956	0.0192	0.19	0.8315	0.0292	0.38	0.4396	0.022
																																				0.191	0.495	0.0188	0.191	0.8557	0.0305	0.382	0.4304	0.0201
																																				0.192	0.495	0.0188	0.192	0.8304	0.0257	0.384	0.4406	0.0223
																																				0.193	0.4943	0.0186	0.193	0.8047	0.0248	0.386	0.4361	0.0217
																																				0.194	0.495	0.0191	0.194	0.821	0.0272	0.388	0.4287	0.0204
																																				0.195	0.4955	0.0191	0.195	0.8468	0.0305	0.39	0.429	0.0207
																																				0.196	0.4947	0.0191	0.196	0.8613	0.027	0.392	0.4412	0.0236
																																				0.197	0.4959	0.019	0.197	0.8239	0.0273	0.394	0.4371	0.0213
																																				0.198	0.4956	0.0191	0.198	0.8174	0.0265	0.396	0.4413	0.0216
																																				0.199	0.4956	0.0191	0.199	0.8188	0.0277	0.398	0.4361	0.0186
																																				0.2	0.4958	0.0194	0.2	0.8222	0.027	0.4	0.4399	0.0189
																																				0.201	0.4959	0.0195	0.201	0.8401	0.0293	0.402	0.4465	0.019
																																				0.202	0.4955	0.0189	0.202	0.8212	0.0279	0.404	0.443	0.0196
																																				0.203	0.4967	0.0189	0.203	0.8233	0.0274	0.406	0.4422	0.0216
																																				0.204	0.4961	0.0186	0.204	0.8239	0.0259	0.408	0.4352	0.0206
																																				0.205	0.4954	0.0188	0.205	0.8107	0.0291	0.41	0.4459	0.0222
																																				0.206	0.4949	0.0188	0.206	0.8249	0.0268	0.412	0.4384	0.0219
																																				0.207	0.4972	0.0196	0.207	0.8438	0.0279	0.414	0.4447	0.0236
																																				0.208	0.4955	0.0189	0.208	0.8079	0.0279	0.416	0.4309	0.0208
																																				0.209	0.4946	0.0186	0.209	0.8275	0.0247	0.418	0.4377	0.0207
																																				0.21	0.4954	0.0186	0.21	0.8137	0.0243	0.42	0.4416	0.0202
																																				0.211	0.4938	0.0191	0.211	0.8101	0.0291	0.422	0.4418	0.0212
																																				0.212	0.496	0.0195	0.212	0.8423	0.0311	0.424	0.4368	0.0209
																																				0.213	0.4969	0.0195	0.213	0.8278	0.0259	0.426	0.4286	0.0187
																																				0.214	0.4966	0.0193	0.214	0.8139	0.0272	0.428	0.4375	0.0186
																																				0.215	0.496	0.0194	0.215	0.8041	0.0242	0.43	0.4505	0.0212
																																				0.216	0.4961	0.0197	0.216	0.8138	0.027	0.432	0.4478	0.0206
																																				0.217	0.4974	0.0196	0.217	0.84	0.0318	0.434	0.445	0.0215
																																				0.218	0.4954	0.0188	0.218	0.8332	0.0305	0.436	0.443	0.0223
																																				0.219	0.4967	0.0189	0.219	0.8251	0.0293	0.438	0.435	0.0219
																																				0.22	0.4956	0.0186	0.22	0.8176	0.0275	0.44	0.4274	0.0218
																																				0.221	0.4966	0.0188	0.221	0.794	0.0269	0.442	0.4285	0.0226
																																				0.222	0.4963	0.0195	0.222	0.8265	0.0287	0.444	0.4413	0.0247
																																				0.223	0.4969	0.02	0.223	0.8376	0.0328	0.446	0.4356	0.0227
																																				0.224	0.4962	0.0195	0.224	0.8277	0.0319	0.448	0.4368	0.0245
																																				0.225	0.4955	0.0188	0.225	0.8096	0.0275	0.45	0.4391	0.0249
																																				0.226	0.4963	0.0194	0.226	0.7851	0.0251	0.452	0.4243	0.0219
																																				0.227	0.4966	0.0193	0.227	0.8048	0.0269	0.454	0.4277	0.0244
																																				0.228	0.4965	0.0193	0.228	0.8232	0.0296	0.456	0.4349	0.0223
																																				0.229	0.4977	0.0195	0.229	0.8236	0.0311	0.458	0.4341	0.0172
																																				0.23	0.497	0.0193	0.23	0.8162	0.0301	0.46	0.445	0.0187
																																				0.231	0.4968	0.0191	0.231	0.8098	0.0256	0.462	0.4364	0.0176
																																				0.232	0.4966	0.0191	0.232	0.8068	0.0272	0.464	0.4407	0.0201
																																				0.233	0.4973	0.0201	0.233	0.8036	0.0288	0.466	0.4404	0.0216
																																				0.234	0.4957	0.0197	0.234	0.8189	0.0273	0.468	0.4308	0.0191
																																				0.235	0.4963	0.0195	0.235	0.8116	0.0276	0.47	0.4384	0.0208
																																				0.236	0.4966	0.0184	0.236	0.8081	0.027	0.472	0.444	0.0217
																																				0.237	0.4964	0.0189	0.237	0.7936	0.024	0.474	0.4359	0.0192
																																				0.238	0.4973	0.0195	0.238	0.7959	0.0251	0.476	0.4382	0.0216
																																				0.239	0.4959	0.0196	0.239	0.8191	0.0346	0.478	0.433	0.0208
																																				0.24	0.4967	0.0194	0.24	0.8047	0.032	0.48	0.4289	0.0182
																																				0.241	0.4966	0.0192	0.241	0.8128	0.0286	0.482	0.4423	0.0205
																																				0.242	0.4964	0.0187	0.242	0.806	0.0282	0.484	0.4327	0.0198
																																				0.243	0.4959	0.0188	0.243	0.8215	0.023	0.486	0.4372	0.0211
																																				0.244	0.4962	0.0199	0.244	0.7855	0.0288	0.488	0.4341	0.0227
																																				0.245	0.496	0.0196	0.245	0.7973	0.0298	0.49	0.4275	0.0215
																																				0.246	0.4976	0.0195	0.246	0.8215	0.0277	0.492	0.4364	0.0237
																																				0.247	0.4967	0.0192	0.247	0.7831	0.0272	0.494	0.4419	0.0221
																																				0.248	0.4965	0.019	0.248	0.8097	0.0279	0.496	0.4451	0.0214
																																				0.249	0.4969	0.0193	0.249	0.7864	0.0309	0.498	0.4404	0.0201
																																				0.25	0.4971	0.0199	0.25	0.8046	0.0292	0.5	0.4329	0.0192
																																				0.251	0.4964	0.0194	0.251	0.8099	0.0271	0.502	0.443	0.0224
																																				0.252	0.4977	0.0194	0.252	0.8064	0.0272	0.504	0.4375	0.0198
																																				0.253	0.498	0.019	0.253	0.801	0.0298	0.506	0.4501	0.0236
																																				0.254	0.4975	0.0192	0.254	0.7803	0.0298	0.508	0.4435	0.0216
																																				0.255	0.497	0.0193	0.255	0.7872	0.0279	0.51	0.44	0.0211
																																				0.256	0.4964	0.0194	0.256	0.7963	0.0297	0.512	0.4302	0.0182
																																				0.257	0.4968	0.019	0.257	0.8024	0.0305	0.514	0.4414	0.022
																																				0.258	0.4965	0.0191	0.258	0.8018	0.0285	0.516	0.4371	0.0199
																																				0.259	0.4969	0.0193	0.259	0.7947	0.0269	0.518	0.4441	0.0209
																																				0.26	0.4978	0.0195	0.26	0.7888	0.0275	0.52	0.4482	0.0176
																																				0.261	0.4955	0.0197	0.261	0.7952	0.0293	0.522	0.4445	0.0168
																																				0.262	0.497	0.0199	0.262	0.8117	0.0311	0.524	0.4444	0.0179
																																				0.263	0.4977	0.0196	0.263	0.8047	0.0315	0.526	0.438	0.0176
																																				0.264	0.4977	0.0194	0.264	0.7897	0.029	0.528	0.4428	0.0206
																																				0.265	0.4965	0.0189	0.265	0.7888	0.0261	0.53	0.4433	0.0213
																																				0.266	0.4963	0.0195	0.266	0.779	0.0273	0.532	0.4427	0.0205
																																				0.267	0.4966	0.0195	0.267	0.8008	0.0272	0.534	0.4301	0.0176
																																				0.268	0.4971	0.0199	0.268	0.7956	0.0265	0.536	0.4335	0.0201
																																				0.269	0.4969	0.019	0.269	0.8083	0.0282	0.538	0.4441	0.0247
																																				0.27	0.4979	0.0192	0.27	0.7856	0.0251	0.54	0.4384	0.0218
																																				0.271	0.4965	0.0194	0.271	0.7823	0.0262	0.542	0.438	0.0225
																																				0.272	0.4968	0.0192	0.272	0.7949	0.0261	0.544	0.4393	0.0218
																																				0.273	0.497	0.0194	0.273	0.7856	0.0276	0.546	0.439	0.0212
																																				0.274	0.4971	0.0192	0.274	0.7798	0.0303	0.548	0.4357	0.0206
																																				0.275	0.4957	0.0192	0.275	0.7899	0.0283	0.55	0.4351	0.0192
																																				0.276	0.4959	0.0193	0.276	0.7797	0.0284	0.552	0.4346	0.0187
																																				0.277	0.4971	0.0195	0.277	0.7898	0.0296	0.554	0.4355	0.0207
																																				0.278	0.4963	0.0197	0.278	0.8046	0.031	0.556	0.436	0.0205
																																				0.279	0.4967	0.0198	0.279	0.811	0.0303	0.558	0.4372	0.0192
																																				0.28	0.4975	0.0191	0.28	0.7781	0.0279	0.56	0.4297	0.0192
																																				0.281	0.4984	0.0191	0.281	0.7792	0.0279	0.562	0.4333	0.0202
																																				0.282	0.4981	0.0197	0.282	0.7755	0.0272	0.564	0.4369	0.0198
																																				0.283	0.4985	0.02	0.283	0.7877	0.0266	0.566	0.4417	0.0197
																																				0.284	0.4964	0.0199	0.284	0.7933	0.0266	0.568	0.4408	0.0186
																																				0.285	0.4963	0.019	0.285	0.7961	0.0271	0.57	0.4349	0.0184
																																				0.286	0.4985	0.0196	0.286	0.7879	0.0257	0.572	0.4221	0.0189
																																				0.287	0.4982	0.0194	0.287	0.7646	0.0225	0.574	0.4334	0.0229
																																				0.288	0.4982	0.0196	0.288	0.7926	0.0244	0.576	0.4373	0.0197
																																				0.289	0.4966	0.0194	0.289	0.781	0.0282	0.578	0.4541	0.0203
																																				0.29	0.4973	0.0197	0.29	0.8029	0.0276	0.58	0.4486	0.0214
																																				0.291	0.4968	0.0193	0.291	0.7817	0.0287	0.582	0.4376	0.0191
																																				0.292	0.4963	0.0187	0.292	0.7852	0.0256	0.584	0.445	0.0222
																																				0.293	0.4972	0.0193	0.293	0.7751	0.0241	0.586	0.4346	0.0207
																																				0.294	0.4966	0.0198	0.294	0.7661	0.0297	0.588	0.4211	0.0194
																																				0.295	0.4985	0.0202	0.295	0.7862	0.0298	0.59	0.4295	0.0227
																																				0.296	0.4984	0.0196	0.296	0.7899	0.0273	0.592	0.4253	0.0197
																																				0.297	0.499	0.0193	0.297	0.7728	0.0251	0.594	0.4462	0.021
																																				0.298	0.497	0.0198	0.298	0.781	0.0257	0.596	0.4422	0.0172
																																				0.299	0.4971	0.0196	0.299	0.7726	0.0284	0.598	0.4455	0.0185
																																				0.3	0.4981	0.0197	0.3	0.7879	0.0277	0.6	0.4481	0.0198
																																				0.301	0.4976	0.0197	0.301	0.7863	0.0248	0.602	0.4609	0.0197
																																				0.302	0.4984	0.0198	0.302	0.7789	0.0274	0.604	0.4555	0.0172
																																				0.303	0.4985	0.0195	0.303	0.7736	0.0259	0.606	0.4594	0.0184
																																				0.304	0.4982	0.0195	0.304	0.7664	0.0275	0.608	0.4419	0.0163
																																				0.305	0.4968	0.0197	0.305	0.7746	0.0252	0.61	0.4438	0.0202
																																				0.306	0.4976	0.0199	0.306	0.7664	0.0288	0.612	0.445	0.0222
																																				0.307	0.4983	0.02	0.307	0.7818	0.0292	0.614	0.4433	0.0209
																																				0.308	0.4969	0.0194	0.308	0.7656	0.0255	0.616	0.4409	0.0218
																																				0.309	0.4973	0.0192	0.309	0.7666	0.0246	0.618	0.4298	0.0202
																																				0.31	0.4972	0.0195	0.31	0.7738	0.0258	0.62	0.4205	0.0199
																																				0.311	0.496	0.0199	0.311	0.7783	0.0268	0.622	0.4281	0.0219
																																				0.312	0.4979	0.0197	0.312	0.7872	0.0321	0.624	0.4278	0.021
																																				0.313	0.4981	0.0195	0.313	0.7782	0.0305	0.626	0.435	0.0191
																																				0.314	0.4983	0.0197	0.314	0.776	0.0283	0.628	0.4461	0.0213
																																				0.315	0.4976	0.0197	0.315	0.7613	0.0274	0.63	0.4408	0.0212
																																				0.316	0.4971	0.0197	0.316	0.7676	0.0286	0.632	0.4342	0.0229
																																				0.317	0.4967	0.0198	0.317	0.764	0.0239	0.634	0.4283	0.022
																																				0.318	0.4977	0.0198	0.318	0.7755	0.0308	0.636	0.4325	0.0221
																																				0.319	0.4984	0.0196	0.319	0.7639	0.0261	0.638	0.4312	0.021
																																				0.32	0.4973	0.0188	0.32	0.759	0.0268	0.64	0.4317	0.0215
																																				0.321	0.4972	0.0198	0.321	0.7514	0.0239	0.642	0.4553	0.0239
																																				0.322	0.4977	0.0198	0.322	0.7547	0.0286	0.644	0.4447	0.0195
																																				0.323	0.4978	0.0202	0.323	0.7694	0.031	0.646	0.4412	0.019
																																				0.324	0.4986	0.0199	0.324	0.7665	0.0272	0.648	0.4364	0.0181
																																				0.325	0.4975	0.0193	0.325	0.7722	0.0278	0.65	0.4394	0.0193
																																				0.326	0.4975	0.0194	0.326	0.7539	0.0241	0.652	0.4299	0.0183
																																				0.327	0.4969	0.0198	0.327	0.7534	0.0243	0.654	0.4364	0.0212
																																				0.328	0.4977	0.0203	0.328	0.7679	0.0287	0.656	0.4347	0.0221
																																				0.329	0.4977	0.0197	0.329	0.7731	0.031	0.658	0.4302	0.0215
																																				0.33	0.4987	0.0198	0.33	0.7511	0.0248	0.66	0.4275	0.0208
																																				0.331	0.4989	0.0197	0.331	0.7507	0.0269	0.662	0.4354	0.0235
																																				0.332	0.4965	0.0195	0.332	0.7645	0.0259	0.664	0.439	0.0217
																																				0.333	0.498	0.0201	0.333	0.7521	0.0288	0.666	0.4328	0.019
																																				0.334	0.4968	0.0195	0.334	0.7551	0.0254	0.668	0.4403	0.0204
																																				0.335	0.4979	0.0198	0.335	0.7671	0.0301	0.67	0.4437	0.0206
																																				0.336	0.4979	0.0195	0.336	0.7686	0.0264	0.672	0.4441	0.0212
																																				0.337	0.4983	0.0193	0.337	0.7538	0.0261	0.674	0.4325	0.0211
																																				0.338	0.4984	0.0201	0.338	0.7512	0.0259	0.676	0.4281	0.0191
																																				0.339	0.4972	0.02	0.339	0.7514	0.0286	0.678	0.4361	0.0211
																																				0.34	0.4983	0.02	0.34	0.7572	0.0274	0.68	0.4388	0.0226
																																				0.341	0.4981	0.0197	0.341	0.7723	0.0269	0.682	0.4324	0.0204
																																				0.342	0.4976	0.0196	0.342	0.7525	0.0268	0.684	0.438	0.0227
																																				0.343	0.4978	0.0198	0.343	0.7366	0.0229	0.686	0.4291	0.0217
																																				0.344	0.4962	0.0197	0.344	0.744	0.0277	0.688	0.4337	0.0241
																																				0.345	0.4971	0.0201	0.345	0.7642	0.0291	0.69	0.4252	0.0189
																																				0.346	0.498	0.0194	0.346	0.7526	0.0265	0.692	0.4368	0.0198
																																				0.347	0.4975	0.0197	0.347	0.7451	0.0272	0.694	0.442	0.0201
																																				0.348	0.4978	0.0198	0.348	0.7447	0.025	0.696	0.436	0.0194
																																				0.349	0.4972	0.0195	0.349	0.7404	0.0258	0.698	0.4349	0.0196
																																				0.35	0.4985	0.0201	0.35	0.7578	0.0264	0.7	0.4383	0.0194
																																				0.351	0.4971	0.0202	0.351	0.7623	0.0296	0.702	0.4446	0.0206
																																				0.352	0.498	0.02	0.352	0.7492	0.0276	0.704	0.432	0.0172
																																				0.353	0.4983	0.0195	0.353	0.7517	0.0241	0.706	0.443	0.0213
																																				0.354	0.4972	0.0196	0.354	0.7421	0.0248	0.708	0.4339	0.022
																																				0.355	0.4972	0.0197	0.355	0.749	0.0258	0.71	0.4349	0.0236
																																				0.356	0.4972	0.02	0.356	0.7514	0.0293	0.712	0.4396	0.0215
																																				0.357	0.4983	0.0197	0.357	0.7553	0.0287	0.714	0.4349	0.0207
																																				0.358	0.4975	0.0199	0.358	0.744	0.03	0.716	0.4251	0.0193
																																				0.359	0.497	0.0196	0.359	0.73	0.025	0.718	0.4367	0.0231
																																				0.36	0.4978	0.0198	0.36	0.7446	0.0243	0.72	0.4338	0.0216
																																				0.361	0.4961	0.02	0.361	0.7478	0.0268	0.722	0.4291	0.0211
																																				0.362	0.498	0.0201	0.362	0.7472	0.0292	0.724	0.4387	0.023
																																				0.363	0.499	0.0199	0.363	0.7559	0.0249	0.726	0.4298	0.0174
																																				0.364	0.4982	0.0194	0.364	0.748	0.0265	0.728	0.4385	0.0163
																																				0.365	0.4975	0.0197	0.365	0.7343	0.0252	0.73	0.4454	0.0192
																																				0.366	0.4959	0.0199	0.366	0.7346	0.0253	0.732	0.4364	0.0188
																																				0.367	0.4976	0.0204	0.367	0.744	0.0301	0.734	0.4331	0.0191
																																				0.368	0.4975	0.0195	0.368	0.7539	0.0314	0.736	0.4354	0.0212
																																				0.369	0.4985	0.0197	0.369	0.7369	0.0244	0.738	0.4322	0.0216
																																				0.37	0.4983	0.0194	0.37	0.7259	0.0263	0.74	0.4337	0.0206
																																				0.371	0.4971	0.0195	0.371	0.7348	0.0257	0.742	0.4477	0.0208
																																				0.372	0.4973	0.0198	0.372	0.7358	0.0263	0.744	0.4498	0.022
																																				0.373	0.497	0.0197	0.373	0.7403	0.0274	0.746	0.4445	0.0205
																																				0.374	0.4987	0.0194	0.374	0.7449	0.0277	0.748	0.4535	0.0208
																																				0.375	0.4971	0.02	0.375	0.7372	0.0247	0.75	0.4476	0.018
																																				0.376	0.4973	0.0196	0.376	0.73	0.0235	0.752	0.4477	0.0166
																																				0.377	0.4968	0.0199	0.377	0.7317	0.0267	0.754	0.4567	0.0207
																																				0.378	0.4971	0.0199	0.378	0.7347	0.0259	0.756	0.4473	0.02
																																				0.379	0.4979	0.0204	0.379	0.7496	0.0271	0.758	0.4431	0.02
																																				0.38	0.4982	0.02	0.38	0.7323	0.0288	0.76	0.43	0.0188
																																				0.381	0.4982	0.0191	0.381	0.7334	0.0256	0.762	0.4408	0.02
																																				0.382	0.4984	0.0199	0.382	0.7232	0.0253	0.764	0.447	0.0218
																																				0.383	0.497	0.0201	0.383	0.7326	0.0277	0.766	0.4374	0.0213
																																				0.384	0.4978	0.0199	0.384	0.7313	0.0277	0.768	0.4408	0.0223
																																				0.385	0.4979	0.0195	0.385	0.7372	0.0273	0.77	0.4395	0.0203
																																				0.386	0.4995	0.02	0.386	0.7266	0.0258	0.772	0.4348	0.0191
																																				0.387	0.4977	0.0195	0.387	0.7142	0.0271	0.774	0.43	0.0202
																																				0.388	0.4977	0.0197	0.388	0.7315	0.0239	0.776	0.4324	0.0211
																																				0.389	0.4984	0.02	0.389	0.7295	0.0281	0.778	0.4377	0.0197
																																				0.39	0.4988	0.02	0.39	0.7232	0.0283	0.78	0.4454	0.0198
																																				0.391	0.4991	0.0202	0.391	0.7269	0.0263	0.782	0.4378	0.0175
																																				0.392	0.4979	0.0194	0.392	0.7326	0.0251	0.784	0.4272	0.0156
																																				0.393	0.4971	0.0196	0.393	0.7161	0.0237	0.786	0.4412	0.0214
																																				0.394	0.4977	0.02	0.394	0.7252	0.025	0.788	0.4253	0.0196
																																				0.395	0.4985	0.0201	0.395	0.7417	0.0283	0.79	0.431	0.0232
																																				0.396	0.499	0.0199	0.396	0.7308	0.0288	0.792	0.4218	0.0212
																																				0.397	0.4987	0.02	0.397	0.7235	0.0262	0.794	0.4418	0.0243
																																				0.398	0.4989	0.0199	0.398	0.7193	0.0237	0.796	0.426	0.0188
																																				0.399	0.4971	0.0203	0.399	0.7211	0.0241	0.798	0.4337	0.02
																																				0.4	0.4986	0.0202	0.4	0.7235	0.0259	0.8	0.441	0.0204
																																				0.401	0.4975	0.0199	0.401	0.7205	0.0243	0.802	0.4412	0.0178
																																				0.402	0.498	0.0198	0.402	0.7167	0.0237	0.804	0.4437	0.0186
																																				0.403	0.4985	0.0197	0.403	0.7273	0.0261	0.806	0.4393	0.0218
																																				0.404	0.4975	0.0197	0.404	0.7053	0.0229	0.808	0.435	0.022
																																				0.405	0.498	0.0203	0.405	0.7169	0.0254	0.81	0.4424	0.0209
																																				0.406	0.4982	0.0203	0.406	0.7226	0.0265	0.812	0.4442	0.0185
																																				0.407	0.4975	0.0198	0.407	0.7229	0.0282	0.814	0.4456	0.0194
																																				0.408	0.4969	0.0196	0.408	0.7278	0.0266	0.816	0.4411	0.0186
																																				0.409	0.4982	0.02	0.409	0.7094	0.0236	0.818	0.4387	0.0189
																																				0.41	0.4974	0.0201	0.41	0.7175	0.024	0.82	0.4485	0.0196
																																				0.411	0.4969	0.0202	0.411	0.7259	0.0274	0.822	0.4482	0.0196
																																				0.412	0.4975	0.0206	0.412	0.7281	0.0289	0.824	0.446	0.0195
																																				0.413	0.499	0.02	0.413	0.7284	0.0247	0.826	0.4411	0.0192
																																				0.414	0.4985	0.0201	0.414	0.7109	0.0236	0.828	0.4376	0.0209
																																				0.415	0.4972	0.0196	0.415	0.7116	0.027	0.83	0.4259	0.0197
																																				0.416	0.4971	0.0202	0.416	0.7104	0.0245	0.832	0.433	0.022
																																				0.417	0.4975	0.0202	0.417	0.7177	0.0257	0.834	0.4441	0.025
																																				0.418	0.4984	0.0204	0.418	0.7306	0.0265	0.836	0.4374	0.0211
																																				0.419	0.4983	0.02	0.419	0.716	0.0264	0.838	0.441	0.0217
																																				0.42	0.4981	0.0198	0.42	0.7068	0.025	0.84	0.4466	0.0198
																																				0.421	0.4974	0.0198	0.421	0.7097	0.0244	0.842	0.456	0.0228
																																				0.422	0.4978	0.0204	0.422	0.6998	0.0258	0.844	0.4555	0.0245
																																				0.423	0.4984	0.0204	0.423	0.7116	0.0248	0.846	0.4511	0.0189
																																				0.424	0.4983	0.0201	0.424	0.722	0.0276	0.848	0.4533	0.02
																																				0.425	0.4974	0.0198	0.425	0.7149	0.0242	0.85	0.4447	0.0199
																																				0.426	0.498	0.02	0.426	0.6994	0.0233	0.852	0.4455	0.0215
																																				0.427	0.4972	0.0203	0.427	0.7028	0.0241	0.854	0.4355	0.0214
																																				0.428	0.4981	0.0207	0.428	0.7153	0.0225	0.856	0.4379	0.0237
																																				0.429	0.4985	0.0205	0.429	0.7221	0.0278	0.858	0.432	0.0185
																																				0.43	0.498	0.0201	0.43	0.7034	0.0253	0.86	0.4437	0.0202
																																				0.431	0.4981	0.02	0.431	0.7016	0.0261	0.862	0.4397	0.0197
																																				0.432	0.4974	0.0204	0.432	0.7024	0.0234	0.864	0.4418	0.0193
																																				0.433	0.4977	0.0201	0.433	0.7012	0.0248	0.866	0.4488	0.0206
																																				0.434	0.4975	0.0201	0.434	0.7108	0.0216	0.868	0.4437	0.018
																																				0.435	0.498	0.0203	0.435	0.7159	0.0235	0.87	0.4441	0.0185
																																				0.436	0.4983	0.0199	0.436	0.71	0.0257	0.872	0.4395	0.0176
																																				0.437	0.4977	0.0198	0.437	0.6963	0.0235	0.874	0.4403	0.0199
																																				0.438	0.4978	0.0205	0.438	0.6972	0.0229	0.876	0.4364	0.0195
																																				0.439	0.4973	0.0205	0.439	0.7166	0.027	0.878	0.4409	0.0225
																																				0.44	0.4981	0.0204	0.44	0.7076	0.0269	0.88	0.4317	0.0198
																																				0.441	0.4985	0.0205	0.441	0.702	0.0244	0.882	0.4346	0.0192
																																				0.442	0.4978	0.02	0.442	0.702	0.0263	0.884	0.4326	0.0209
																																				0.443	0.4976	0.0202	0.443	0.7045	0.0236	0.886	0.4319	0.0229
																																				0.444	0.4964	0.0202	0.444	0.7033	0.0226	0.888	0.4394	0.0238
																																				0.445	0.4972	0.0204	0.445	0.7033	0.023	0.89	0.4359	0.0194
																																				0.446	0.4978	0.0204	0.446	0.7155	0.0264	0.892	0.4465	0.0211
																																				0.447	0.4984	0.0203	0.447	0.7013	0.0275	0.894	0.4427	0.0218
																																				0.448	0.4985	0.0203	0.448	0.6972	0.0235	0.896	0.4331	0.023
																																				0.449	0.4973	0.0202	0.449	0.693	0.0242	0.898	0.424	0.023
																																				0.45	0.4979	0.0207	0.45	0.702	0.0257	0.9	0.4287	0.0221
																																				0.451	0.4972	0.0205	0.451	0.7111	0.0253	0.902	0.4341	0.0187
																																				0.452	0.499	0.02	0.452	0.7024	0.0223	0.904	0.444	0.0195
																																				0.453	0.4991	0.02	0.453	0.695	0.0234	0.906	0.4398	0.0189
																																				0.454	0.4984	0.0198	0.454	0.6931	0.0255	0.908	0.435	0.0199
																																				0.455	0.4966	0.0202	0.455	0.6945	0.0258	0.91	0.4433	0.0212
																																				0.456	0.4971	0.0203	0.456	0.6945	0.0273	0.912	0.439	0.0183
																																				0.457	0.4981	0.02	0.457	0.7025	0.0274	0.914	0.447	0.019
																																				0.458	0.4969	0.0198	0.458	0.6944	0.0262	0.916	0.4318	0.0182
																																				0.459	0.4976	0.0202	0.459	0.6879	0.0261	0.918	0.4326	0.021
																																				0.46	0.4971	0.0199	0.46	0.6915	0.0241	0.92	0.4283	0.0198
																																				0.461	0.4964	0.0204	0.461	0.7017	0.024	0.922	0.4308	0.0196
																																				0.462	0.498	0.0201	0.462	0.7028	0.0274	0.924	0.4346	0.0192
																																				0.463	0.4989	0.0205	0.463	0.7008	0.0265	0.926	0.441	0.0199
																																				0.464	0.498	0.0203	0.464	0.6926	0.0257	0.928	0.4484	0.0228
																																				0.465	0.4981	0.0199	0.465	0.696	0.0258	0.93	0.4455	0.0222
																																				0.466	0.497	0.0203	0.466	0.6851	0.0256	0.932	0.4419	0.021
																																				0.467	0.4978	0.0203	0.467	0.7015	0.0215	0.934	0.4426	0.0195
																																				0.468	0.4972	0.0203	0.468	0.7007	0.0265	0.936	0.4454	0.0213
																																				0.469	0.4978	0.02	0.469	0.701	0.0241	0.938	0.4419	0.0202
																																				0.47	0.4987	0.0198	0.47	0.6852	0.0233	0.94	0.4421	0.0203
																																				0.471	0.4983	0.0202	0.471	0.6904	0.0207	0.942	0.4403	0.0195
																																				0.472	0.4978	0.0206	0.472	0.6852	0.0239	0.944	0.4502	0.0239
																																				0.473	0.4976	0.0204	0.473	0.697	0.0264	0.946	0.4406	0.0211
																																				0.474	0.4983	0.0205	0.474	0.6917	0.0241	0.948	0.4345	0.0195
																																				0.475	0.4977	0.0202	0.475	0.6978	0.0241	0.95	0.4395	0.0201
																																				0.476	0.4979	0.0203	0.476	0.687	0.0232	0.952	0.4462	0.0205
																																				0.477	0.497	0.0204	0.477	0.6926	0.0229	0.954	0.4423	0.0187
																																				0.478	0.4972	0.0205	0.478	0.6943	0.0254	0.956	0.4475	0.0217
																																				0.479	0.4986	0.0204	0.479	0.7024	0.0273	0.958	0.4419	0.02
																																				0.48	0.4993	0.0207	0.48	0.6894	0.0251	0.96	0.4508	0.0202
																																				0.481	0.4974	0.0201	0.481	0.6788	0.0222	0.962	0.4594	0.02
																																				0.482	0.4957	0.0201	0.482	0.6862	0.0233	0.964	0.4534	0.0169
																																				0.483	0.4985	0.0206	0.483	0.6835	0.0232	0.966	0.4456	0.0183
																																				0.484	0.4977	0.0205	0.484	0.6828	0.0233	0.968	0.4299	0.0189
																																				0.485	0.4969	0.02	0.485	0.6865	0.0247	0.97	0.4318	0.0213
																																				0.486	0.4981	0.02	0.486	0.6844	0.0236	0.972	0.4301	0.0196
																																				0.487	0.4994	0.0206	0.487	0.6758	0.0226	0.974	0.438	0.0187
																																				0.488	0.4976	0.0201	0.488	0.6754	0.0237	0.976	0.4498	0.0208
																																				0.489	0.4969	0.0197	0.489	0.693	0.0253	0.978	0.4381	0.0199
																																				0.49	0.499	0.0205	0.49	0.6842	0.0223	0.98	0.4367	0.021
																																				0.491	0.4982	0.02	0.491	0.6799	0.0241	0.982	0.4391	0.0199
																																				0.492	0.497	0.0198	0.492	0.6818	0.0238	0.984	0.4414	0.0197
																																				0.493	0.4973	0.0204	0.493	0.688	0.0233	0.986	0.4473	0.021
																																				0.494	0.4973	0.0203	0.494	0.6721	0.0226	0.988	0.4411	0.0192
																																				0.495	0.4981	0.0206	0.495	0.6987	0.0276	0.99	0.4399	0.0207
																																				0.496	0.498	0.0203	0.496	0.6846	0.0259	0.992	0.437	0.0201
																																				0.497	0.4984	0.0203	0.497	0.6823	0.0229	0.994	0.4425	0.0238
																																				0.498	0.4971	0.0201	0.498	0.6748	0.021	0.996	0.4388	0.021
																																				0.499	0.4968	0.0202	0.499	0.6756	0.0224	0.998	0.4287	0.0193
																																				0.5	0.4975	0.0206	0.5	0.6849	0.0228	1	0.4326	0.023
																																				0.501	0.4968	0.0202	0.501	0.6848	0.0238	1.002	0.4286	0.0221
																																				0.502	0.4974	0.0201	0.502	0.6855	0.0229	1.004	0.4356	0.0219
																																				0.503	0.498	0.0198	0.503	0.674	0.0226	1.006	0.4411	0.0229
																																				0.504	0.4979	0.0199	0.504	0.6757	0.023	1.008	0.4395	0.0183
																																				0.505	0.4976	0.0207	0.505	0.6788	0.0212	1.01	0.4434	0.0183
																																				0.506	0.4965	0.0207	0.506	0.6775	0.0242	1.012	0.4517	0.0191
																																				0.507	0.4972	0.0202	0.507	0.6775	0.0221	1.014	0.4408	0.0173
																																				0.508	0.497	0.0199	0.508	0.6667	0.0229	1.016	0.4466	0.0228
																																				0.509	0.4978	0.0203	0.509	0.6739	0.0221	1.018	0.4288	0.0221
																																				0.51	0.497	0.0204	0.51	0.6775	0.0213	1.02	0.4218	0.0214
																																				0.511	0.4967	0.0202	0.511	0.6759	0.0217	1.022	0.4296	0.0224
																																				0.512	0.4971	0.0204	0.512	0.6883	0.0265	1.024	0.4289	0.0203
																																				0.513	0.499	0.0204	0.513	0.6766	0.0205	1.026	0.4401	0.0216
																																				0.514	0.4986	0.0202	0.514	0.6688	0.0207	1.028	0.4437	0.0203
																																				0.515	0.4977	0.0198	0.515	0.6773	0.0224	1.03	0.444	0.0222
																																				0.516	0.498	0.0202	0.516	0.6683	0.0231	1.032	0.4386	0.0221
																																				0.517	0.4979	0.0209	0.517	0.6779	0.0227	1.034	0.4455	0.0223
																																				0.518	0.4976	0.0204	0.518	0.6779	0.0233	1.036	0.4332	0.0196
																																				0.519	0.4987	0.0202	0.519	0.6669	0.0211	1.038	0.4239	0.0192
																																				0.52	0.4973	0.0199	0.52	0.6703	0.0237	1.04	0.4361	0.0248
																																				0.521	0.4973	0.0203	0.521	0.6605	0.0202	1.042	0.4361	0.0241
																																				0.522	0.4977	0.0204	0.522	0.665	0.0215	1.044	0.4368	0.0211
																																				0.523	0.4978	0.0205	0.523	0.6719	0.0243	1.046	0.4458	0.021
																																				0.524	0.4974	0.0205	0.524	0.6717	0.0243	1.048	0.4362	0.0196
																																				0.525	0.4969	0.0198	0.525	0.6642	0.0241	1.05	0.4317	0.0193
																																				0.526	0.497	0.0202	0.526	0.6647	0.021	1.052	0.4405	0.0204
																																				0.527	0.4976	0.0204	0.527	0.6619	0.0215	1.054	0.4327	0.0177
																																				0.528	0.4975	0.0208	0.528	0.6749	0.0214	1.056	0.435	0.0187
																																				0.529	0.4988	0.0209	0.529	0.6836	0.0238	1.058	0.4357	0.0211
																																				0.53	0.4976	0.0204	0.53	0.6644	0.0235	1.06	0.4327	0.0207
																																				0.531	0.4988	0.0204	0.531	0.6727	0.0228	1.062	0.4365	0.0215
																																				0.532	0.497	0.0203	0.532	0.6696	0.0255	1.064	0.4366	0.021
																																				0.533	0.4966	0.0206	0.533	0.6528	0.0197	1.066	0.4275	0.0201
																																				0.534	0.497	0.0207	0.534	0.6772	0.021	1.068	0.4294	0.0209
																																				0.535	0.4974	0.0203	0.535	0.6619	0.0231	1.07	0.4315	0.02
																																				0.536	0.4987	0.0202	0.536	0.6626	0.0201	1.072	0.4331	0.0201
																																				0.537	0.4974	0.02	0.537	0.6632	0.0234	1.074	0.4465	0.0216
																																				0.538	0.4975	0.0203	0.538	0.6505	0.0197	1.076	0.4359	0.0183
																																				0.539	0.497	0.0203	0.539	0.6669	0.0215	1.078	0.455	0.0225
																																				0.54	0.4979	0.0204	0.54	0.6703	0.0226	1.08	0.449	0.0201
																																				0.541	0.4976	0.0203	0.541	0.6627	0.0247	1.082	0.4469	0.0223
																																				0.542	0.4968	0.0203	0.542	0.6538	0.0198	1.084	0.4359	0.0206
																																				0.543	0.4977	0.0205	0.543	0.6648	0.0212	1.086	0.4351	0.0211
																																				0.544	0.4973	0.0204	0.544	0.6659	0.0218	1.088	0.4358	0.019
																																				0.545	0.4974	0.0208	0.545	0.6745	0.024	1.09	0.4421	0.021
																																				0.546	0.4972	0.0202	0.546	0.6727	0.0227	1.092	0.4378	0.0215
																																				0.547	0.4978	0.0206	0.547	0.661	0.0223	1.094	0.4348	0.0216
																																				0.548	0.4976	0.0203	0.548	0.6529	0.0242	1.096	0.4356	0.0221
																																				0.549	0.4958	0.0201	0.549	0.6493	0.0231	1.098	0.4358	0.0232
																																				0.55	0.4976	0.0204	0.55	0.6701	0.0226	1.1	0.4416	0.0238
																																				0.551	0.4974	0.0207	0.551	0.6585	0.0234	1.102	0.4449	0.0222
																																				0.552	0.4974	0.0202	0.552	0.6688	0.0246	1.104	0.4328	0.0203
																																				0.553	0.4987	0.0204	0.553	0.6642	0.0217	1.106	0.4409	0.0233
																																				0.554	0.4978	0.02	0.554	0.6581	0.0209	1.108	0.4344	0.0211
																																				0.555	0.4972	0.0204	0.555	0.6608	0.0233	1.11	0.4409	0.0205
																																				0.556	0.4973	0.0205	0.556	0.6612	0.0218	1.112	0.444	0.0198
																																				0.557	0.4968	0.02	0.557	0.6723	0.0248	1.114	0.4433	0.0204
																																				0.558	0.4966	0.0204	0.558	0.6617	0.0232	1.116	0.442	0.0228
																																				0.559	0.4962	0.02	0.559	0.6565	0.0226	1.118	0.4326	0.0213
																																				0.56	0.4967	0.0203	0.56	0.6469	0.021	1.12	0.4496	0.0221
																																				0.561	0.4955	0.0206	0.561	0.6551	0.0214	1.122	0.4457	0.0202
																																				0.562	0.4975	0.0203	0.562	0.6694	0.023	1.124	0.4456	0.0206
																																				0.563	0.4977	0.0207	0.563	0.6687	0.0227	1.126	0.4325	0.0195
																																				0.564	0.498	0.0205	0.564	0.6533	0.0217	1.128	0.4423	0.0228
																																				0.565	0.4975	0.0204	0.565	0.654	0.0224	1.13	0.4457	0.0257
																																				0.566	0.4967	0.0206	0.566	0.6515	0.0222	1.132	0.4308	0.0218
																																				0.567	0.4967	0.0205	0.567	0.6605	0.0205	1.134	0.4343	0.0226
																																				0.568	0.4964	0.0208	0.568	0.6602	0.0213	1.136	0.4307	0.0209
																																				0.569	0.4973	0.0204	0.569	0.6621	0.0226	1.138	0.4308	0.021
																																				0.57	0.4965	0.0201	0.57	0.6512	0.0214	1.14	0.432	0.0221
																																				0.571	0.4968	0.0204	0.571	0.6495	0.0224	1.142	0.4416	0.0228
																																				0.572	0.4974	0.0207	0.572	0.6543	0.0218	1.144	0.4414	0.0208
																																				0.573	0.4975	0.0206	0.573	0.659	0.0226	1.146	0.4465	0.021
																																				0.574	0.4967	0.0205	0.574	0.6656	0.0252	1.148	0.4345	0.0222
																																				0.575	0.4968	0.0203	0.575	0.652	0.0228	1.15	0.4372	0.0217
																																				0.576	0.4959	0.0201	0.576	0.6466	0.0216	1.152	0.4424	0.0206
																																				0.577	0.4961	0.0205	0.577	0.6563	0.0217	1.154	0.4432	0.0188
																																				0.578	0.4967	0.0207	0.578	0.6633	0.0223	1.156	0.4422	0.02
																																				0.579	0.4969	0.0209	0.579	0.6654	0.0229	1.158	0.4344	0.0194
																																				0.58	0.4973	0.0203	0.58	0.6552	0.0247	1.16	0.4433	0.0217
																																				0.581	0.497	0.0203	0.581	0.6485	0.0197	1.162	0.4453	0.0195
																																				0.582	0.4973	0.0204	0.582	0.6465	0.0213	1.164	0.4502	0.0221
																																				0.583	0.4978	0.0209	0.583	0.6462	0.0216	1.166	0.4424	0.0203
																																				0.584	0.4959	0.0208	0.584	0.6564	0.0216	1.168	0.4379	0.0196
																																				0.585	0.4968	0.0201	0.585	0.6583	0.0236	1.17	0.4368	0.0189
																																				0.586	0.4975	0.0206	0.586	0.6542	0.0198	1.172	0.44	0.0166
																																				0.587	0.4972	0.0204	0.587	0.6462	0.0221	1.174	0.4491	0.0185
																																				0.588	0.4969	0.0206	0.588	0.6448	0.0201	1.176	0.4425	0.0181
																																				0.589	0.4964	0.0206	0.589	0.6575	0.0223	1.178	0.4424	0.021
																																				0.59	0.4966	0.0206	0.59	0.6495	0.0213	1.18	0.436	0.0225
																																				0.591	0.4961	0.0207	0.591	0.6528	0.0229	1.182	0.4338	0.0207
																																				0.592	0.4958	0.0201	0.592	0.6373	0.0213	1.184	0.442	0.0201
																																				0.593	0.4963	0.0204	0.593	0.6462	0.0207	1.186	0.4422	0.021
																																				0.594	0.4954	0.0206	0.594	0.6512	0.023	1.188	0.437	0.0228
																																				0.595	0.4964	0.0206	0.595	0.6498	0.0224	1.19	0.4349	0.0209
																																				0.596	0.4974	0.0207	0.596	0.6555	0.0233	1.192	0.44	0.0198
																																				0.597	0.4981	0.0209	0.597	0.6513	0.023	1.194	0.4516	0.0208
																																				0.598	0.4974	0.0205	0.598	0.6431	0.0199	1.196	0.4382	0.0183
																																				0.599	0.4972	0.0207	0.599	0.6351	0.0224	1.198	0.4386	0.0202
																																				0.6	0.4968	0.0209	0.6	0.6424	0.021	1.2	0.4382	0.0217
																																				0.601	0.4965	0.0205	0.601	0.6485	0.0207	1.202	0.4441	0.0235
																																				0.602	0.4965	0.0202	0.602	0.6487	0.0226	1.204	0.4428	0.0221
																																				0.603	0.4976	0.0205	0.603	0.6423	0.019	1.206	0.4419	0.0213
																																				0.604	0.4969	0.0206	0.604	0.6431	0.02	1.208	0.4385	0.0189
																																				0.605	0.4972	0.0208	0.605	0.6456	0.0204	1.21	0.4397	0.0201
																																				0.606	0.4977	0.021	0.606	0.6481	0.0225	1.212	0.4476	0.023
																																				0.607	0.4968	0.0206	0.607	0.6474	0.0222	1.214	0.4433	0.021
																																				0.608	0.4969	0.0203	0.608	0.6537	0.0226	1.216	0.4526	0.0234
																																				0.609	0.4964	0.0203	0.609	0.6456	0.0212	1.218	0.4388	0.0201
																																				0.61	0.4962	0.0203	0.61	0.6459	0.0209	1.22	0.4392	0.0209
																																				0.611	0.4961	0.021	0.611	0.6354	0.0205	1.222	0.4445	0.0219
																																				0.612	0.4972	0.021	0.612	0.6449	0.0218	1.224	0.4433	0.0203
																																				0.613	0.4971	0.0207	0.613	0.6485	0.0208	1.226	0.4403	0.0208
																																				0.614	0.4976	0.0206	0.614	0.6418	0.0194	1.228	0.4369	0.0208
																																				0.615	0.4972	0.0206	0.615	0.6368	0.0215	1.23	0.4417	0.023
																																				0.616	0.4956	0.0206	0.616	0.6345	0.0215	1.232	0.4454	0.024
																																				0.617	0.4969	0.0209	0.617	0.6443	0.0189	1.234	0.4259	0.0206
																																				0.618	0.4971	0.0205	0.618	0.64	0.019	1.236	0.4341	0.0201
																																				0.619	0.4975	0.0206	0.619	0.6443	0.0211	1.238	0.4473	0.0211
																																				0.62	0.4971	0.0204	0.62	0.6372	0.0215	1.24	0.4428	0.0196
																																				0.621	0.4961	0.0204	0.621	0.6368	0.0217	1.242	0.4448	0.0193
																																				0.622	0.4966	0.0206	0.622	0.6373	0.02	1.244	0.4433	0.0184
																																				0.623	0.4967	0.0207	0.623	0.6448	0.0218	1.246	0.4514	0.0214
																																				0.624	0.4964	0.0206	0.624	0.6442	0.0219	1.248	0.4493	0.0187
																																				0.625	0.4963	0.0203	0.625	0.6335	0.0205	1.25	0.4487	0.0192
																																				0.626	0.4966	0.0203	0.626	0.6347	0.0177	1.252	0.4481	0.0207
																																				0.627	0.4962	0.0209	0.627	0.6398	0.0199	1.254	0.4385	0.0219
																																				0.628	0.4961	0.021	0.628	0.6402	0.0209	1.256	0.4353	0.0228
																																				0.629	0.4969	0.0209	0.629	0.6406	0.0227	1.258	0.436	0.0222
																																				0.63	0.4968	0.0204	0.63	0.6385	0.0207	1.26	0.4399	0.0199
																																				0.631	0.4965	0.0208	0.631	0.6325	0.0209	1.262	0.4411	0.021
																																				0.632	0.4965	0.0205	0.632	0.6365	0.0208	1.264	0.4289	0.0209
																																				0.633	0.4975	0.0208	0.633	0.637	0.0209	1.266	0.4422	0.0251
																																				0.634	0.4967	0.0209	0.634	0.6385	0.0195	1.268	0.4341	0.0215
																																				0.635	0.4964	0.0207	0.635	0.6384	0.0189	1.27	0.4449	0.0214
																																				0.636	0.4976	0.0208	0.636	0.629	0.019	1.272	0.4418	0.0205
																																				0.637	0.4967	0.0208	0.637	0.6337	0.0204	1.274	0.4484	0.0228
																																				0.638	0.4965	0.0202	0.638	0.6335	0.0194	1.276	0.4503	0.0245
																																				0.639	0.4963	0.0207	0.639	0.6343	0.0209	1.278	0.4441	0.0237
																																				0.64	0.4966	0.0207	0.64	0.6405	0.0212	1.28	0.4316	0.0216
																																				0.641	0.496	0.0205	0.641	0.6336	0.022	1.282	0.4383	0.0225
																																				0.642	0.4956	0.0203	0.642	0.6266	0.0186	1.284	0.4411	0.0218
																																				0.643	0.4966	0.0204	0.643	0.6269	0.0203	1.286	0.4371	0.0204
																																				0.644	0.4955	0.0209	0.644	0.6319	0.02	1.288	0.4394	0.0193
																																				0.645	0.4969	0.0207	0.645	0.6394	0.0203	1.29	0.438	0.0201
																																				0.646	0.4975	0.0206	0.646	0.6337	0.0206	1.292	0.45	0.0216
																																				0.647	0.4959	0.0207	0.647	0.6359	0.0224	1.294	0.4371	0.0201
																																				0.648	0.4965	0.0202	0.648	0.6249	0.0217	1.296	0.4414	0.0232
																																				0.649	0.4955	0.0205	0.649	0.6246	0.0189	1.298	0.4232	0.0208
																																				0.65	0.4968	0.0212	0.65	0.6264	0.0195	1.3	0.4371	0.0239
																																				0.651	0.496	0.0206	0.651	0.6306	0.0189	1.302	0.4331	0.0228
																																				0.652	0.4973	0.0206	0.652	0.6294	0.02	1.304	0.4378	0.0213
																																				0.653	0.4976	0.0207	0.653	0.6297	0.02	1.306	0.4455	0.0206
																																				0.654	0.4965	0.0204	0.654	0.6179	0.0193	1.308	0.4434	0.0189
																																				0.655	0.4969	0.0206	0.655	0.6311	0.0208	1.31	0.4445	0.0184
																																				0.656	0.4963	0.021	0.656	0.6277	0.0204	1.312	0.4482	0.0215
																																				0.657	0.4971	0.021	0.657	0.6343	0.0203	1.314	0.4405	0.0182
																																				0.658	0.4956	0.0205	0.658	0.6271	0.0209	1.316	0.4607	0.0237
																																				0.659	0.4956	0.0206	0.659	0.6278	0.0195	1.318	0.4371	0.0209
																																				0.66	0.4949	0.0207	0.66	0.6264	0.0205	1.32	0.4344	0.0218
																																				0.661	0.4964	0.0211	0.661	0.6348	0.0209	1.322	0.4339	0.0225
																																				0.662	0.4971	0.0208	0.662	0.6271	0.0192	1.324	0.4394	0.0243
																																				0.663	0.4973	0.0209	0.663	0.6366	0.0203	1.326	0.4267	0.0197
																																				0.664	0.4972	0.0206	0.664	0.6225	0.0198	1.328	0.4365	0.0189
																																				0.665	0.4964	0.0207	0.665	0.6245	0.0206	1.33	0.4409	0.0201
																																				0.666	0.4955	0.0208	0.666	0.6214	0.0187	1.332	0.4427	0.0215
																																				0.667	0.4969	0.0213	0.667	0.6265	0.0202	1.334	0.4388	0.0221
																																				0.668	0.4951	0.0207	0.668	0.6296	0.0212	1.336	0.4435	0.0231
																																				0.669	0.4967	0.0201	0.669	0.629	0.0184	1.338	0.4352	0.02
																																				0.67	0.4959	0.0204	0.67	0.625	0.0202	1.34	0.4416	0.0219
																																				0.671	0.4956	0.0201	0.671	0.6199	0.0173	1.342	0.4478	0.024
																																				0.672	0.4956	0.0207	0.672	0.6149	0.0189	1.344	0.4447	0.0235
																																				0.673	0.4963	0.0208	0.673	0.622	0.0192	1.346	0.4321	0.0188
																																				0.674	0.4974	0.0205	0.674	0.6275	0.0187	1.348	0.4321	0.0189
																																				0.675	0.4963	0.0205	0.675	0.6247	0.0205	1.35	0.4346	0.0229
																																				0.676	0.4952	0.0206	0.676	0.6203	0.0198	1.352	0.4338	0.0226
																																				0.677	0.4955	0.0208	0.677	0.6239	0.0181	1.354	0.4326	0.0196
																																				0.678	0.4958	0.0208	0.678	0.6211	0.0187	1.356	0.4372	0.0201
																																				0.679	0.497	0.0212	0.679	0.6281	0.02	1.358	0.4407	0.0216
																																				0.68	0.4971	0.0208	0.68	0.621	0.0197	1.36	0.4345	0.0206
																																				0.681	0.4963	0.0205	0.681	0.6165	0.0193	1.362	0.4343	0.023
																																				0.682	0.496	0.0206	0.682	0.6163	0.0207	1.364	0.442	0.023
																																				0.683	0.4968	0.0211	0.683	0.6191	0.0174	1.366	0.4403	0.0217
																																				0.684	0.4969	0.0209	0.684	0.6204	0.0189	1.368	0.4336	0.0203
																																				0.685	0.4963	0.0206	0.685	0.6298	0.0191	1.37	0.4435	0.0229
																																				0.686	0.4969	0.0202	0.686	0.6209	0.0187	1.372	0.4236	0.0188
																																				0.687	0.4958	0.0204	0.687	0.6153	0.0182	1.374	0.4364	0.023
																																				0.688	0.4958	0.0207	0.688	0.6104	0.0187	1.376	0.4402	0.0251
																																				0.689	0.4961	0.0207	0.689	0.6181	0.0197	1.378	0.4346	0.0208
																																				0.69	0.4965	0.0208	0.69	0.6198	0.0197	1.38	0.4413	0.0197
																																				0.691	0.4958	0.0206	0.691	0.6194	0.0198	1.382	0.4414	0.0188
																																				0.692	0.4954	0.0204	0.692	0.6104	0.019	1.384	0.4521	0.0221
																																				0.693	0.4964	0.0206	0.693	0.6124	0.0197	1.386	0.4434	0.0224
																																				0.694	0.4952	0.0205	0.694	0.6205	0.0211	1.388	0.4386	0.02
																																				0.695	0.4965	0.0208	0.695	0.621	0.0192	1.39	0.4419	0.0235
																																				0.696	0.4962	0.0209	0.696	0.6242	0.019	1.392	0.4397	0.0246
																																				0.697	0.4967	0.0207	0.697	0.6107	0.0188	1.394	0.4441	0.0231
																																				0.698	0.4956	0.0206	0.698	0.6071	0.0182	1.396	0.4395	0.0209
																																				0.699	0.4948	0.0201	0.699	0.6091	0.0199	1.398	0.439	0.0216
																																				0.7	0.4956	0.021	0.7	0.6125	0.0193	1.4	0.436	0.0222
																																				0.701	0.4968	0.0211	0.701	0.6163	0.0192	1.402	0.4398	0.0212
																																				0.702	0.496	0.0206	0.702	0.6128	0.0186	1.404	0.4385	0.0166
																																				0.703	0.4971	0.0203	0.703	0.607	0.0177	1.406	0.4547	0.0185
																																				0.704	0.4955	0.0204	0.704	0.6164	0.0191	1.408	0.4622	0.0215
																																				0.705	0.496	0.0208	0.705	0.6133	0.0193	1.41	0.4511	0.02
																																				0.706	0.4963	0.0211	0.706	0.6156	0.0197	1.412	0.4473	0.0223
																																				0.707	0.4955	0.0207	0.707	0.6194	0.0202	1.414	0.4372	0.0194
																																				0.708	0.4956	0.0202	0.708	0.6105	0.0197	1.416	0.446	0.0207
																																				0.709	0.4957	0.0205	0.709	0.61	0.0179	1.418	0.4424	0.0209
																																				0.71	0.4948	0.0208	0.71	0.6049	0.0183	1.42	0.4378	0.02
																																				0.711	0.4947	0.0205	0.711	0.6127	0.018	1.422	0.4369	0.0211
																																				0.712	0.4964	0.0207	0.712	0.6106	0.0183	1.424	0.4346	0.0234
																																				0.713	0.4966	0.0206	0.713	0.6229	0.0194	1.426	0.4258	0.025
																																				0.714	0.4967	0.0204	0.714	0.6112	0.0183	1.428	0.4324	0.025
																																				0.715	0.496	0.0207	0.715	0.608	0.0174	1.43	0.4334	0.025
																																				0.716	0.4955	0.0205	0.716	0.6044	0.0186	1.432	0.4348	0.0236
																																				0.717	0.4961	0.0205	0.717	0.6141	0.0172	1.434	0.4366	0.0219
																																				0.718	0.4961	0.0206	0.718	0.6178	0.0183	1.436	0.4424	0.0208
																																				0.719	0.4961	0.0204	0.719	0.6111	0.0176	1.438	0.4374	0.0177
																																				0.72	0.4951	0.0205	0.72	0.6067	0.0179	1.44	0.449	0.0207
																																				0.721	0.4959	0.0207	0.721	0.6043	0.0187	1.442	0.4509	0.0213
																																				0.722	0.4955	0.0208	0.722	0.6095	0.0172	1.444	0.4402	0.0189
																																				0.723	0.4965	0.021	0.723	0.6113	0.0181	1.446	0.4488	0.0212
																																				0.724	0.4966	0.0208	0.724	0.6117	0.0184	1.448	0.4408	0.02
																																				0.725	0.4954	0.0204	0.725	0.6128	0.0166	1.45	0.4414	0.0199
																																				0.726	0.4958	0.02	0.726	0.6008	0.017	1.452	0.4409	0.0192
																																				0.727	0.4952	0.0206	0.727	0.6109	0.0161	1.454	0.452	0.0218
																																				0.728	0.4947	0.0207	0.728	0.6068	0.0188	1.456	0.446	0.0218
																																				0.729	0.4955	0.0207	0.729	0.6111	0.0203	1.458	0.4321	0.0183
																																				0.73	0.4958	0.0207	0.73	0.6132	0.0182	1.46	0.4461	0.02
																																				0.731	0.4965	0.0203	0.731	0.6042	0.0153	1.462	0.4403	0.0207
																																				0.732	0.4949	0.0205	0.732	0.6022	0.0166	1.464	0.4486	0.0234
																																				0.733	0.4963	0.0208	0.733	0.6086	0.018	1.466	0.4484	0.0228
																																				0.734	0.4953	0.021	0.734	0.6144	0.0166	1.468	0.4362	0.0183
																																				0.735	0.4962	0.0206	0.735	0.6136	0.0172	1.47	0.4415	0.0194
																																				0.736	0.4961	0.0203	0.736	0.6093	0.0165	1.472	0.4485	0.0209
																																				0.737	0.4961	0.0203	0.737	0.6047	0.0174	1.474	0.4497	0.0218
																																				0.738	0.4953	0.0205	0.738	0.6036	0.0167	1.476	0.4374	0.0199
																																				0.739	0.4948	0.0208	0.739	0.607	0.0179	1.478	0.436	0.0207
																																				0.74	0.4953	0.0208	0.74	0.6097	0.0197	1.48	0.4458	0.0231
																																				0.741	0.4954	0.0205	0.741	0.6107	0.0182	1.482	0.4348	0.0193
																																				0.742	0.496	0.0204	0.742	0.6033	0.0159	1.484	0.4393	0.0218
																																				0.743	0.4939	0.0205	0.743	0.6038	0.0148	1.486	0.4493	0.0241
																																				0.744	0.495	0.0205	0.744	0.603	0.0171	1.488	0.445	0.0213
																																				0.745	0.4957	0.0211	0.745	0.6062	0.0168	1.49	0.4412	0.0207
																																				0.746	0.496	0.0209	0.746	0.6096	0.0179	1.492	0.4372	0.021
																																				0.747	0.4957	0.0206	0.747	0.6072	0.0165	1.494	0.4331	0.021
																																				0.748	0.4964	0.0201	0.748	0.6087	0.0186	1.496	0.4321	0.0201
																																				0.749	0.4957	0.0205	0.749	0.6031	0.0182	1.498	0.4383	0.019
																																				0.75	0.4958	0.021	0.75	0.607	0.0179	1.5	0.4495	0.0202
																																				0.751	0.4954	0.0207	0.751	0.605	0.0178	1.502	0.4511	0.0214
																																				0.752	0.497	0.0205	0.752	0.6054	0.0168	1.504	0.4526	0.0219
																																				0.753	0.4962	0.0204	0.753	0.6007	0.0167	1.506	0.4389	0.0202
																																				0.754	0.496	0.0202	0.754	0.5942	0.0169	1.508	0.437	0.0202
																																				0.755	0.4949	0.0208	0.755	0.6001	0.0158	1.51	0.4467	0.0214
																																				0.756	0.4957	0.0211	0.756	0.6035	0.019	1.512	0.4415	0.0201
																																				0.757	0.4958	0.0207	0.757	0.5984	0.0169	1.514	0.4501	0.023
																																				0.758	0.4955	0.0203	0.758	0.6	0.0166	1.516	0.4414	0.0226
																																				0.759	0.4955	0.0204	0.759	0.5974	0.0169	1.518	0.4373	0.0208
																																				0.76	0.495	0.0204	0.76	0.5989	0.0162	1.52	0.4458	0.0215
																																				0.761	0.4948	0.0208	0.761	0.6034	0.0172	1.522	0.432	0.0187
																																				0.762	0.4963	0.0213	0.762	0.6053	0.0186	1.524	0.4429	0.0205
																																				0.763	0.4964	0.0207	0.763	0.6013	0.0166	1.526	0.4428	0.0196
																																				0.764	0.496	0.0206	0.764	0.5965	0.0175	1.528	0.4383	0.0184
																																				0.765	0.4967	0.0208	0.765	0.5984	0.0177	1.53	0.4405	0.0202
																																				0.766	0.4953	0.0206	0.766	0.5927	0.0153	1.532	0.4348	0.0194
																																				0.767	0.4954	0.0207	0.767	0.6008	0.0156	1.534	0.4399	0.0176
																																				0.768	0.4952	0.021	0.768	0.5996	0.0169	1.536	0.4435	0.0172
																																				0.769	0.4963	0.0205	0.769	0.5991	0.0161	1.538	0.4501	0.0214
																																				0.77	0.4955	0.0202	0.77	0.5945	0.0158	1.54	0.4413	0.0213
																																				0.771	0.4946	0.0206	0.771	0.5959	0.0159	1.542	0.4444	0.0225
																																				0.772	0.4958	0.0209	0.772	0.5962	0.0158	1.544	0.4353	0.0213
																																				0.773	0.4953	0.0209	0.773	0.5977	0.019	1.546	0.4416	0.0227
																																				0.774	0.4951	0.0204	0.774	0.6022	0.0175	1.548	0.4388	0.0235
																																				0.775	0.4949	0.0202	0.775	0.5964	0.0165	1.55	0.4377	0.0213
																																				0.776	0.4954	0.0205	0.776	0.5944	0.0174	1.552	0.4475	0.0231
																																				0.777	0.4951	0.021	0.777	0.5937	0.014	1.554	0.4394	0.0213
																																				0.778	0.4951	0.021	0.778	0.605	0.0185	1.556	0.4434	0.0231
																																				0.779	0.495	0.0209	0.779	0.6016	0.0168	1.558	0.4306	0.0226
																																				0.78	0.4963	0.0206	0.78	0.5998	0.0178	1.56	0.4395	0.0258
																																				0.781	0.4965	0.0209	0.781	0.5885	0.015	1.562	0.4326	0.0241
																																				0.782	0.4949	0.0205	0.782	0.5985	0.0171	1.564	0.4464	0.0246
																																				0.783	0.495	0.0206	0.783	0.591	0.0167	1.566	0.4416	0.0216
																																				0.784	0.4957	0.0208	0.784	0.602	0.0159	1.568	0.4466	0.0218
																																				0.785	0.4954	0.0204	0.785	0.5974	0.0167	1.57	0.4508	0.0258
																																				0.786	0.4963	0.0205	0.786	0.5931	0.0165	1.572	0.4376	0.0222
																																				0.787	0.4949	0.0204	0.787	0.5839	0.0146	1.574	0.4493	0.0227
																																				0.788	0.4958	0.0208	0.788	0.594	0.0155	1.576	0.4421	0.0202
																																				0.789	0.4956	0.0211	0.789	0.5985	0.0184	1.578	0.4436	0.0209
																																				0.79	0.4962	0.0205	0.79	0.5992	0.0168	1.58	0.441	0.0208
																																				0.791	0.4949	0.0205	0.791	0.596	0.0166	1.582	0.4384	0.0193
																																				0.792	0.4954	0.0204	0.792	0.5952	0.0157	1.584	0.4391	0.0197
																																				0.793	0.4943	0.021	0.793	0.5947	0.0169	1.586	0.4515	0.0235
																																				0.794	0.4949	0.0209	0.794	0.5937	0.0163	1.588	0.4392	0.0204
																																				0.795	0.4951	0.0207	0.795	0.6018	0.0174	1.59	0.4411	0.0217
																																				0.796	0.4958	0.0208	0.796	0.5988	0.0167	1.592	0.4329	0.0187
																																				0.797	0.4963	0.0209	0.797	0.5942	0.0174	1.594	0.4386	0.0221
																																				0.798	0.496	0.0208	0.798	0.5928	0.017	1.596	0.4383	0.0212
																																				0.799	0.4953	0.0209	0.799	0.5872	0.0175	1.598	0.4385	0.0208
																																				0.8	0.4954	0.0207	0.8	0.5927	0.0176	1.6	0.4425	0.0207
																																				0.801	0.4953	0.021	0.801	0.5992	0.0165	1.602	0.4407	0.0206
																																				0.802	0.4958	0.0207	0.802	0.5935	0.0168	1.604	0.4504	0.0217
																																				0.803	0.4958	0.0206	0.803	0.5891	0.0156	1.606	0.4451	0.0209
																																				0.804	0.4946	0.0204	0.804	0.5886	0.0154	1.608	0.4414	0.0205
																																				0.805	0.4951	0.0205	0.805	0.5943	0.0172	1.61	0.4409	0.0226
																																				0.806	0.4955	0.021	0.806	0.5925	0.0173	1.612	0.4399	0.0232
																																				0.807	0.4954	0.021	0.807	0.5927	0.0171	1.614	0.4394	0.0225
																																				0.808	0.4948	0.0207	0.808	0.5881	0.0165	1.616	0.4428	0.0242
																																				0.809	0.4948	0.0202	0.809	0.5888	0.0148	1.618	0.4404	0.0242
																																				0.81	0.4949	0.0207	0.81	0.592	0.0154	1.62	0.4453	0.023
																																				0.811	0.494	0.0206	0.811	0.5912	0.0171	1.622	0.4487	0.0207
																																				0.812	0.4959	0.0211	0.812	0.5903	0.0155	1.624	0.4608	0.0194
																																				0.813	0.4956	0.0207	0.813	0.5921	0.0161	1.626	0.449	0.0192
																																				0.814	0.4962	0.0208	0.814	0.5895	0.0169	1.628	0.4441	0.0204
																																				0.815	0.4949	0.0204	0.815	0.5864	0.0157	1.63	0.4436	0.0236
																																				0.816	0.4943	0.0207	0.816	0.5897	0.0166	1.632	0.4414	0.0224
																																				0.817	0.4946	0.0209	0.817	0.5962	0.0167	1.634	0.4358	0.0217
																																				0.818	0.4951	0.021	0.818	0.589	0.0152	1.636	0.4305	0.0214
																																				0.819	0.4959	0.021	0.819	0.5936	0.0169	1.638	0.4335	0.0225
																																				0.82	0.4957	0.0203	0.82	0.5878	0.0165	1.64	0.4319	0.0199
																																				0.821	0.4955	0.0209	0.821	0.588	0.0147	1.642	0.445	0.0248
																																				0.822	0.4946	0.0209	0.822	0.5917	0.0178	1.644	0.4255	0.0203
																																				0.823	0.4957	0.0208	0.823	0.5871	0.0164	1.646	0.4346	0.0222
																																				0.824	0.4948	0.0207	0.824	0.5917	0.0183	1.648	0.4426	0.0236
																																				0.825	0.4954	0.0205	0.825	0.588	0.017	1.65	0.447	0.0218
																																				0.826	0.4945	0.0204	0.826	0.5839	0.0164	1.652	0.4521	0.0204
																																				0.827	0.4948	0.0206	0.827	0.5811	0.015	1.654	0.4577	0.02
																																				0.828	0.495	0.0211	0.828	0.5861	0.0165	1.656	0.4453	0.0196
																																				0.829	0.4946	0.0211	0.829	0.5978	0.0188	1.658	0.4369	0.0187
																																				0.83	0.4958	0.0206	0.83	0.5933	0.0171	1.66	0.4412	0.022
																																				0.831	0.4958	0.0209	0.831	0.5838	0.0149	1.662	0.4399	0.022
																																				0.832	0.4953	0.0205	0.832	0.582	0.0147	1.664	0.4424	0.0222
																																				0.833	0.4954	0.0213	0.833	0.5847	0.0166	1.666	0.4471	0.0231
																																				0.834	0.4951	0.0211	0.834	0.5881	0.0175	1.668	0.4352	0.0221
																																				0.835	0.4959	0.0209	0.835	0.5918	0.0159	1.67	0.4328	0.0215
																																				0.836	0.4957	0.0203	0.836	0.5878	0.0146	1.672	0.427	0.0209
																																				0.837	0.4945	0.0204	0.837	0.5795	0.0151	1.674	0.4273	0.0195
																																				0.838	0.4954	0.0207	0.838	0.5855	0.0164	1.676	0.4453	0.0209
																																				0.839	0.4948	0.0207	0.839	0.5844	0.0169	1.678	0.4372	0.0181
																																				0.84	0.4954	0.0211	0.84	0.586	0.017	1.68	0.4462	0.0231
																																				0.841	0.495	0.0207	0.841	0.5864	0.0174	1.682	0.4311	0.0232
																																				0.842	0.4942	0.0202	0.842	0.5803	0.0168	1.684	0.4288	0.023
																																				0.843	0.4957	0.0207	0.843	0.5778	0.0136	1.686	0.4356	0.0257
																																				0.844	0.4949	0.021	0.844	0.5809	0.0146	1.688	0.4254	0.0227
																																				0.845	0.495	0.0208	0.845	0.5856	0.0142	1.69	0.4374	0.0263
																																				0.846	0.4955	0.0212	0.846	0.5871	0.016	1.692	0.4388	0.0241
																																				0.847	0.4954	0.0211	0.847	0.578	0.0151	1.694	0.438	0.0215
																																				0.848	0.4945	0.0205	0.848	0.5765	0.0147	1.696	0.4358	0.0206
																																				0.849	0.4945	0.0209	0.849	0.5753	0.0155	1.698	0.4394	0.0221
																																				0.85	0.4957	0.0209	0.85	0.5859	0.0172	1.7	0.4362	0.0195
																																				0.851	0.495	0.0209	0.851	0.5813	0.0142	1.702	0.4395	0.0193
																																				0.852	0.4955	0.0206	0.852	0.5844	0.015	1.704	0.4513	0.0195
																																				0.853	0.4955	0.0202	0.853	0.5773	0.0146	1.706	0.4457	0.0197
																																				0.854	0.4957	0.0205	0.854	0.5767	0.0153	1.708	0.4413	0.0191
																																				0.855	0.4947	0.0207	0.855	0.5817	0.0139	1.71	0.4404	0.0201
																																				0.856	0.4962	0.0213	0.856	0.5829	0.015	1.712	0.4445	0.0229
																																				0.857	0.4946	0.0206	0.857	0.5863	0.0155	1.714	0.4442	0.0226
																																				0.858	0.4956	0.021	0.858	0.5845	0.0149	1.716	0.4422	0.0214
																																				0.859	0.4944	0.0206	0.859	0.5754	0.0144	1.718	0.4469	0.0226
																																				0.86	0.4949	0.021	0.86	0.5788	0.0135	1.72	0.443	0.0197
																																				0.861	0.4952	0.0213	0.861	0.5799	0.0141	1.722	0.4462	0.021
																																				0.862	0.497	0.0213	0.862	0.5862	0.0178	1.724	0.4577	0.0209
																																				0.863	0.4955	0.0208	0.863	0.5844	0.0161	1.726	0.4417	0.0201
																																				0.864	0.4957	0.0205	0.864	0.579	0.0151	1.728	0.4498	0.0214
																																				0.865	0.4955	0.0209	0.865	0.5774	0.017	1.73	0.4566	0.0219
																																				0.866	0.4953	0.0209	0.866	0.577	0.0136	1.732	0.4438	0.0187
																																				0.867	0.4957	0.0211	0.867	0.5803	0.0146	1.734	0.4455	0.0208
																																				0.868	0.4946	0.0208	0.868	0.5828	0.0138	1.736	0.4482	0.0227
																																				0.869	0.4957	0.0206	0.869	0.5839	0.0143	1.738	0.4358	0.0208
																																				0.87	0.4951	0.0203	0.87	0.5728	0.015	1.74	0.4389	0.0229
																																				0.871	0.4955	0.0209	0.871	0.5732	0.0141	1.742	0.4468	0.0267
																																				0.872	0.4958	0.0212	0.872	0.5792	0.0146	1.744	0.4356	0.0207
																																				0.873	0.4958	0.0211	0.873	0.5829	0.0162	1.746	0.4371	0.02
																																				0.874	0.4952	0.0208	0.874	0.5807	0.0161	1.748	0.4314	0.0207
																																				0.875	0.4939	0.0205	0.875	0.5785	0.0155	1.75	0.4373	0.0222
																																				0.876	0.495	0.021	0.876	0.5727	0.0132	1.752	0.4326	0.0196
																																				0.877	0.4946	0.0206	0.877	0.5759	0.0138	1.754	0.4394	0.0198
																																				0.878	0.4946	0.0211	0.878	0.5811	0.015	1.756	0.4403	0.0192
																																				0.879	0.4954	0.0213	0.879	0.5821	0.0156	1.758	0.4483	0.0212
																																				0.88	0.4961	0.0212	0.88	0.5803	0.0144	1.76	0.444	0.0203
																																				0.881	0.4959	0.0209	0.881	0.5749	0.0147	1.762	0.4361	0.0199
																																				0.882	0.4951	0.0211	0.882	0.5777	0.0151	1.764	0.4437	0.0222
																																				0.883	0.4951	0.0212	0.883	0.5773	0.0143	1.766	0.4473	0.0248
																																				0.884	0.4942	0.021	0.884	0.5795	0.0148	1.768	0.4403	0.0219
																																				0.885	0.4953	0.0208	0.885	0.5801	0.0156	1.77	0.4383	0.0191
																																				0.886	0.4967	0.021	0.886	0.5747	0.0149	1.772	0.4394	0.0183
																																				0.887	0.4957	0.0205	0.887	0.5712	0.0148	1.774	0.4412	0.0189
																																				0.888	0.495	0.021	0.888	0.5742	0.0142	1.776	0.439	0.0226
																																				0.889	0.4957	0.0212	0.889	0.5771	0.0153	1.778	0.4322	0.0219
																																				0.89	0.4955	0.0212	0.89	0.5761	0.0159	1.78	0.443	0.0239
																																				0.891	0.4953	0.0211	0.891	0.5731	0.0151	1.782	0.4445	0.0247
																																				0.892	0.495	0.0208	0.892	0.5707	0.0131	1.784	0.4393	0.0219
																																				0.893	0.4957	0.0211	0.893	0.5745	0.0146	1.786	0.4448	0.0227
																																				0.894	0.4947	0.0211	0.894	0.5717	0.0154	1.788	0.4421	0.0212
																																				0.895	0.4949	0.0212	0.895	0.579	0.0159	1.79	0.4347	0.02
																																				0.896	0.4956	0.0212	0.896	0.5828	0.0155	1.792	0.4381	0.0249
																																				0.897	0.4962	0.021	0.897	0.573	0.0146	1.794	0.4216	0.0213
																																				0.898	0.4959	0.0208	0.898	0.5714	0.0145	1.796	0.4311	0.0224
																																				0.899	0.4946	0.0209	0.899	0.5713	0.0132	1.798	0.448	0.0228
																																				0.9	0.4956	0.0213	0.9	0.5726	0.0138	1.8	0.4451	0.0198
																																				0.901	0.4946	0.021	0.901	0.5718	0.0136	1.802	0.4432	0.0204
																																				0.902	0.4953	0.0207	0.902	0.5737	0.0154	1.804	0.4454	0.0216
																																				0.903	0.4959	0.0207	0.903	0.5685	0.0136	1.806	0.4381	0.0211
																																				0.904	0.4953	0.0208	0.904	0.5686	0.0139	1.808	0.441	0.0217
																																				0.905	0.4952	0.0213	0.905	0.5712	0.0146	1.81	0.4502	0.0212
																																				0.906	0.4954	0.0208	0.906	0.5737	0.0156	1.812	0.441	0.0174
																																				0.907	0.4955	0.021	0.907	0.5769	0.0153	1.814	0.446	0.0209
																																				0.908	0.495	0.0206	0.908	0.5743	0.0134	1.816	0.4473	0.0232
																																				0.909	0.4949	0.0204	0.909	0.574	0.0145	1.818	0.4402	0.0203
																																				0.91	0.4939	0.0208	0.91	0.5722	0.0146	1.82	0.4399	0.0192
																																				0.911	0.4948	0.0213	0.911	0.5712	0.0141	1.822	0.4448	0.0203
																																				0.912	0.4959	0.0213	0.912	0.5768	0.0159	1.824	0.4438	0.0201
																																				0.913	0.496	0.0211	0.913	0.5766	0.0143	1.826	0.4494	0.0209
																																				0.914	0.496	0.0209	0.914	0.5707	0.0139	1.828	0.4478	0.0194
																																				0.915	0.4959	0.0213	0.915	0.5693	0.0142	1.83	0.4511	0.0211
																																				0.916	0.4948	0.0212	0.916	0.5655	0.014	1.832	0.4478	0.0206
																																				0.917	0.4951	0.021	0.917	0.5744	0.0144	1.834	0.4375	0.0209
																																				0.918	0.4956	0.0213	0.918	0.5708	0.0135	1.836	0.4365	0.0241
																																				0.919	0.4956	0.0206	0.919	0.5712	0.0152	1.838	0.4395	0.0263
																																				0.92	0.4954	0.021	0.92	0.5687	0.0135	1.84	0.4317	0.025
																																				0.921	0.4951	0.0211	0.921	0.5626	0.014	1.842	0.4296	0.0234
																																				0.922	0.4952	0.0213	0.922	0.5715	0.0141	1.844	0.4318	0.0219
																																				0.923	0.4953	0.0209	0.923	0.5692	0.0144	1.846	0.4319	0.0206
																																				0.924	0.4958	0.021	0.924	0.5706	0.0138	1.848	0.4325	0.0182
																																				0.925	0.4947	0.0205	0.925	0.5687	0.0143	1.85	0.445	0.0213
																																				0.926	0.4948	0.0206	0.926	0.5687	0.0139	1.852	0.4426	0.0214
																																				0.927	0.4955	0.0211	0.927	0.5663	0.0133	1.854	0.4436	0.023
																																				0.928	0.4951	0.0211	0.928	0.5745	0.0143	1.856	0.438	0.0209
																																				0.929	0.4953	0.0215	0.929	0.5779	0.0158	1.858	0.4314	0.0189
																																				0.93	0.4961	0.021	0.93	0.5708	0.0142	1.86	0.4419	0.0235
																																				0.931	0.4965	0.021	0.931	0.5688	0.0143	1.862	0.4433	0.0261
																																				0.932	0.495	0.0211	0.932	0.5643	0.013	1.864	0.4408	0.0259
																																				0.933	0.4948	0.0214	0.933	0.569	0.0133	1.866	0.4318	0.0241
																																				0.934	0.495	0.0211	0.934	0.5693	0.0139	1.868	0.4291	0.0227
																																				0.935	0.4952	0.0208	0.935	0.5684	0.0139	1.87	0.4389	0.0228
																																				0.936	0.4958	0.0208	0.936	0.568	0.0142	1.872	0.4429	0.0226
																																				0.937	0.4941	0.0204	0.937	0.565	0.012	1.874	0.4362	0.0207
																																				0.938	0.4954	0.0209	0.938	0.5639	0.0139	1.876	0.4472	0.0215
																																				0.939	0.4946	0.0211	0.939	0.5675	0.0144	1.878	0.4355	0.0169
																																				0.94	0.4953	0.0211	0.94	0.5687	0.0144	1.88	0.457	0.0226
																																				0.941	0.4945	0.0206	0.941	0.5675	0.0131	1.882	0.4564	0.0233
																																				0.942	0.4955	0.0209	0.942	0.5682	0.014	1.884	0.4434	0.0224
																																				0.943	0.494	0.0207	0.943	0.5631	0.0129	1.886	0.4421	0.0241
																																				0.944	0.4941	0.0213	0.944	0.5625	0.0134	1.888	0.4305	0.0221
																																				0.945	0.495	0.0215	0.945	0.5699	0.0142	1.89	0.4289	0.0232
																																				0.946	0.4952	0.0214	0.946	0.5671	0.0137	1.892	0.4345	0.0243
																																				0.947	0.4951	0.0209	0.947	0.5675	0.0136	1.894	0.4354	0.023
																																				0.948	0.4951	0.0206	0.948	0.5652	0.0148	1.896	0.4314	0.0198
																																				0.949	0.4946	0.0211	0.949	0.5645	0.0132	1.898	0.4432	0.0219
																																				0.95	0.4944	0.0215	0.95	0.5641	0.0139	1.9	0.442	0.0208
																																				0.951	0.4948	0.0211	0.951	0.5653	0.0125	1.902	0.4346	0.0209
																																				0.952	0.495	0.0209	0.952	0.5648	0.0122	1.904	0.4384	0.0236
																																				0.953	0.4941	0.0205	0.953	0.5616	0.0139	1.906	0.4331	0.0211
																																				0.954	0.4953	0.0208	0.954	0.5619	0.013	1.908	0.4374	0.0227
																																				0.955	0.4946	0.0207	0.955	0.5638	0.0137	1.91	0.4429	0.023
																																				0.956	0.4951	0.0213	0.956	0.5658	0.0149	1.912	0.43	0.0208
																																				0.957	0.4954	0.0212	0.957	0.5626	0.0135	1.914	0.4353	0.0228
																																				0.958	0.4952	0.0207	0.958	0.5659	0.0138	1.916	0.4297	0.0238
																																				0.959	0.4938	0.0206	0.959	0.5608	0.0138	1.918	0.4324	0.0221
																																				0.96	0.4942	0.0211	0.96	0.5642	0.0127	1.92	0.437	0.0223
																																				0.961	0.4944	0.021	0.961	0.5638	0.0133	1.922	0.4399	0.0217
																																				0.962	0.4959	0.0214	0.962	0.568	0.0127	1.924	0.4366	0.0194
																																				0.963	0.495	0.0212	0.963	0.5625	0.0131	1.926	0.4393	0.0191
																																				0.964	0.4952	0.0208	0.964	0.559	0.013	1.928	0.4446	0.019
																																				0.965	0.4949	0.0212	0.965	0.5575	0.0135	1.93	0.4546	0.024
																																				0.966	0.4947	0.021	0.966	0.5617	0.0134	1.932	0.4408	0.0184
																																				0.967	0.4945	0.0209	0.967	0.5662	0.0136	1.934	0.4469	0.0198
																																				0.968	0.495	0.0212	0.968	0.5628	0.0122	1.936	0.4419	0.0216
																																				0.969	0.4959	0.0212	0.969	0.5646	0.0147	1.938	0.4368	0.0206
																																				0.97	0.4954	0.021	0.97	0.5575	0.0131	1.94	0.4473	0.0223
																																				0.971	0.4948	0.021	0.971	0.5624	0.0136	1.942	0.4464	0.0204
																																				0.972	0.4948	0.021	0.972	0.5579	0.013	1.944	0.4439	0.0189
																																				0.973	0.495	0.0212	0.973	0.5612	0.0141	1.946	0.4293	0.0181
																																				0.974	0.4942	0.0208	0.974	0.5611	0.0139	1.948	0.4439	0.0213
																																				0.975	0.4943	0.0207	0.975	0.5606	0.013	1.95	0.4397	0.0201
																																				0.976	0.4944	0.0209	0.976	0.5573	0.0134	1.952	0.4328	0.0186
																																				0.977	0.4936	0.0208	0.977	0.5618	0.0129	1.954	0.4367	0.0205
																																				0.978	0.496	0.0214	0.978	0.5652	0.0141	1.956	0.4389	0.0198
																																				0.979	0.4947	0.021	0.979	0.5645	0.0136	1.958	0.4436	0.0196
																																				0.98	0.4953	0.0209	0.98	0.5656	0.014	1.96	0.4534	0.0209
																																				0.981	0.4961	0.0209	0.981	0.5568	0.0129	1.962	0.4434	0.0192
																																				0.982	0.4948	0.0209	0.982	0.5605	0.0129	1.964	0.439	0.0208
																																				0.983	0.4948	0.0215	0.983	0.5596	0.0133	1.966	0.4369	0.0214
																																				0.984	0.4942	0.0211	0.984	0.5605	0.0125	1.968	0.438	0.0209
																																				0.985	0.4944	0.0213	0.985	0.5636	0.0131	1.97	0.4546	0.023
																																				0.986	0.4955	0.0209	0.986	0.5593	0.012	1.972	0.4479	0.021
																																				0.987	0.4944	0.021	0.987	0.5547	0.0112	1.974	0.4469	0.0233
																																				0.988	0.495	0.0211	0.988	0.556	0.0117	1.976	0.4451	0.0233
																																				0.989	0.4946	0.0213	0.989	0.5634	0.0139	1.978	0.4387	0.022
																																				0.99	0.4949	0.021	0.99	0.5629	0.0142	1.98	0.4418	0.0241
																																				0.991	0.4942	0.021	0.991	0.5607	0.0146	1.982	0.4295	0.0216
																																				0.992	0.4944	0.0209	0.992	0.558	0.0114	1.984	0.4348	0.0235
																																				0.993	0.4943	0.0212	0.993	0.5541	0.0112	1.986	0.4352	0.0227
																																				0.994	0.4943	0.0211	0.994	0.5604	0.013	1.988	0.4375	0.0217
																																				0.995	0.4949	0.0214	0.995	0.5641	0.0137	1.99	0.4365	0.0208
																																				0.996	0.4947	0.021	0.996	0.5628	0.0137	1.992	0.4426	0.022
																																				0.997	0.4944	0.0212	0.997	0.5588	0.0128	1.994	0.4448	0.0219
																																				0.998	0.4952	0.0212	0.998	0.5574	0.0125	1.996	0.4404	0.0204
																																				0.999	0.4944	0.021	0.999	0.5562	0.0127	1.998	0.4468	0.0215
																																				1	0.4945	0.0212	1	0.5595	0.014	2	0.4416	0.0216
																																				1.001	0.4939	0.021	1.001	0.5604	0.0134	2.002	0.432	0.022
																																				1.002	0.4957	0.0209	1.002	0.5619	0.0125	2.004	0.4442	0.0246
																																				1.003	0.495	0.0208	1.003	0.558	0.0122	2.006	0.4372	0.0235
																																				1.004	0.4945	0.0209	1.004	0.5579	0.0125	2.008	0.4341	0.0211
																																				1.005	0.4944	0.021	1.005	0.5557	0.0134	2.01	0.4372	0.019
																																				1.006	0.4951	0.0214	1.006	0.5568	0.0137	2.012	0.4409	0.0189
																																				1.007	0.4951	0.0212	1.007	0.5614	0.0144	2.014	0.4541	0.0225
																																				1.008	0.4946	0.0208	1.008	0.5568	0.0125	2.016	0.4454	0.0203
																																				1.009	0.4943	0.0209	1.009	0.5574	0.0132	2.018	0.447	0.0206
																																				1.01	0.4943	0.0211	1.01	0.5516	0.012	2.02	0.4475	0.0214
																																				1.011	0.4941	0.0212	1.011	0.5616	0.0121	2.022	0.4492	0.0212
																																				1.012	0.4939	0.021	1.012	0.5596	0.0131	2.024	0.4395	0.0186
																																				1.013	0.4945	0.0213	1.013	0.5575	0.0135	2.026	0.4445	0.0204
																																				1.014	0.4949	0.0209	1.014	0.5554	0.0139	2.028	0.4487	0.0209
																																				1.015	0.4943	0.0212	1.015	0.555	0.0138	2.03	0.453	0.0213
																																				1.016	0.4948	0.0213	1.016	0.5535	0.0129	2.032	0.4491	0.0188
																																				1.017	0.4941	0.0209	1.017	0.5582	0.0121	2.034	0.454	0.0215
																																				1.018	0.4942	0.0212	1.018	0.556	0.0114	2.036	0.4444	0.0225
																																				1.019	0.4941	0.0212	1.019	0.5613	0.0127	2.038	0.4362	0.0205
																																				1.02	0.4942	0.0207	1.02	0.5527	0.0134	2.04	0.4413	0.0217
																																				1.021	0.4936	0.0208	1.021	0.5557	0.0122	2.042	0.4443	0.0234
																																				1.022	0.4946	0.0211	1.022	0.5563	0.0135	2.044	0.435	0.0199
																																				1.023	0.4941	0.021	1.023	0.5586	0.0136	2.046	0.4385	0.019
																																				1.024	0.4945	0.021	1.024	0.5577	0.0135	2.048	0.458	0.0222
																																				1.025	0.4942	0.0208	1.025	0.5527	0.013	2.05	0.4501	0.0192
																																				1.026	0.4939	0.0212	1.026	0.5536	0.0127	2.052	0.4444	0.0198
																																				1.027	0.4935	0.0211	1.027	0.5545	0.0113	2.054	0.4442	0.0211
																																				1.028	0.4947	0.0213	1.028	0.5576	0.0125	2.056	0.4318	0.0197
																																				1.029	0.4944	0.0212	1.029	0.56	0.0148	2.058	0.4418	0.0225
																																				1.03	0.4951	0.0212	1.03	0.5573	0.0121	2.06	0.4414	0.0221
																																				1.031	0.4946	0.0209	1.031	0.5523	0.012	2.062	0.4393	0.023
																																				1.032	0.4942	0.0208	1.032	0.5532	0.0115	2.064	0.434	0.0238
																																				1.033	0.4942	0.0213	1.033	0.5524	0.0111	2.066	0.4369	0.026
																																				1.034	0.495	0.0211	1.034	0.5549	0.0122	2.068	0.4311	0.0228
																																				1.035	0.4942	0.0211	1.035	0.5549	0.0119	2.07	0.4408	0.0237
																																				1.036	0.495	0.021	1.036	0.5527	0.0124	2.072	0.4466	0.0243
																																				1.037	0.4948	0.0209	1.037	0.5549	0.0106	2.074	0.4425	0.021
																																				1.038	0.4944	0.0211	1.038	0.552	0.0115	2.076	0.4426	0.022
																																				1.039	0.4942	0.0215	1.039	0.5599	0.013	2.078	0.4392	0.0214
																																				1.04	0.4948	0.0213	1.04	0.5529	0.0135	2.08	0.4499	0.0252
																																				1.041	0.4941	0.0207	1.041	0.5542	0.0122	2.082	0.4363	0.0229
																																				1.042	0.4951	0.021	1.042	0.5487	0.012	2.084	0.441	0.0232
																																				1.043	0.4934	0.0208	1.043	0.5515	0.0113	2.086	0.4353	0.0215
																																				1.044	0.4935	0.0211	1.044	0.5524	0.0114	2.088	0.431	0.0214
																																				1.045	0.4944	0.0211	1.045	0.5545	0.0124	2.09	0.4447	0.0231
																																				1.046	0.4948	0.0211	1.046	0.5564	0.013	2.092	0.4468	0.0218
																																				1.047	0.4942	0.021	1.047	0.5545	0.0126	2.094	0.4428	0.02
																																				1.048	0.4951	0.0209	1.048	0.5493	0.0122	2.096	0.446	0.0224
																																				1.049	0.4935	0.0209	1.049	0.5525	0.0126	2.098	0.4439	0.0221
																																				1.05	0.4946	0.0215	1.05	0.5532	0.0124	2.1	0.4395	0.0207
																																				1.051	0.4935	0.021	1.051	0.5537	0.0117	2.102	0.4463	0.02
																																				1.052	0.4937	0.021	1.052	0.554	0.0117	2.104	0.4537	0.021
																																				1.053	0.4954	0.021	1.053	0.5495	0.012	2.106	0.4403	0.0177
																																				1.054	0.4946	0.0208	1.054	0.549	0.0125	2.108	0.4512	0.0183
																																				1.055	0.4946	0.0214	1.055	0.5481	0.0122	2.11	0.4414	0.0184
																																				1.056	0.4942	0.0214	1.056	0.5527	0.0124	2.112	0.4458	0.022
																																				1.057	0.4941	0.0212	1.057	0.552	0.0115	2.114	0.432	0.0225
																																				1.058	0.494	0.0209	1.058	0.5496	0.0119	2.116	0.4338	0.0248
																																				1.059	0.494	0.0209	1.059	0.5454	0.0117	2.118	0.4342	0.0245
																																				1.06	0.4936	0.0211	1.06	0.5471	0.0112	2.12	0.4348	0.0238
																																				1.061	0.4939	0.0209	1.061	0.5496	0.0109	2.122	0.4394	0.0216
																																				1.062	0.4948	0.0216	1.062	0.5546	0.0139	2.124	0.4477	0.0216
																																				1.063	0.4945	0.0212	1.063	0.5526	0.0117	2.126	0.4391	0.0201
																																				1.064	0.495	0.0211	1.064	0.5499	0.0123	2.128	0.435	0.0194
																																				1.065	0.4946	0.0211	1.065	0.5485	0.0105	2.13	0.4466	0.0242
																																				1.066	0.4941	0.0216	1.066	0.552	0.0111	2.132	0.4336	0.0227
																																				1.067	0.4938	0.0214	1.067	0.5541	0.0116	2.134	0.4409	0.0239
																																				1.068	0.4937	0.0213	1.068	0.5514	0.0111	2.136	0.4323	0.0218
																																				1.069	0.4946	0.0211	1.069	0.5507	0.0115	2.138	0.4396	0.0228
																																				1.07	0.4948	0.0206	1.07	0.5475	0.0117	2.14	0.4449	0.0218
																																				1.071	0.4938	0.021	1.071	0.5473	0.011	2.142	0.4446	0.0221
																																				1.072	0.4932	0.021	1.072	0.5483	0.0119	2.144	0.4361	0.0216
																																				1.073	0.494	0.0212	1.073	0.5505	0.0113	2.146	0.4318	0.0217
																																				1.074	0.4945	0.0212	1.074	0.5496	0.0124	2.148	0.4346	0.0222
																																				1.075	0.494	0.021	1.075	0.5464	0.0107	2.15	0.434	0.0218
																																				1.076	0.4943	0.021	1.076	0.5458	0.012	2.152	0.4348	0.022
																																				1.077	0.493	0.021	1.077	0.5484	0.012	2.154	0.4407	0.0228
																																				1.078	0.4944	0.0215	1.078	0.5502	0.0107	2.156	0.427	0.0171
																																				1.079	0.4936	0.0212	1.079	0.5487	0.0123	2.158	0.4369	0.0202
																																				1.08	0.4941	0.0213	1.08	0.5501	0.0122	2.16	0.443	0.0209
																																				1.081	0.4947	0.021	1.081	0.5435	0.0115	2.162	0.4394	0.0212
																																				1.082	0.4936	0.0211	1.082	0.547	0.0121	2.164	0.4509	0.0223
																																				1.083	0.4934	0.0212	1.083	0.5455	0.0119	2.166	0.4525	0.0224
																																				1.084	0.4943	0.021	1.084	0.5493	0.0118	2.168	0.4489	0.021
																																				1.085	0.493	0.0211	1.085	0.5456	0.0109	2.17	0.4544	0.0223
																																				1.086	0.4945	0.021	1.086	0.5493	0.0117	2.172	0.4483	0.0202
																																				1.087	0.4945	0.0208	1.087	0.5433	0.0106	2.174	0.4432	0.0192
																																				1.088	0.4939	0.0213	1.088	0.5463	0.0109	2.176	0.4462	0.0229
																																				1.089	0.4942	0.0211	1.089	0.5459	0.0115	2.178	0.4516	0.0237
																																				1.09	0.4938	0.0213	1.09	0.5476	0.0117	2.18	0.4455	0.0225
																																				1.091	0.4935	0.0207	1.091	0.5486	0.0129	2.182	0.4435	0.023
																																				1.092	0.4934	0.0208	1.092	0.5466	0.0107	2.184	0.4365	0.021
																																				1.093	0.4943	0.0211	1.093	0.5463	0.0109	2.186	0.4471	0.0243
																																				1.094	0.4939	0.0212	1.094	0.5456	0.0111	2.188	0.4391	0.0196
																																				1.095	0.4947	0.0217	1.095	0.5488	0.0121	2.19	0.4468	0.0203
																																				1.096	0.4941	0.0212	1.096	0.5495	0.0127	2.192	0.4482	0.0223
																																				1.097	0.4941	0.0207	1.097	0.548	0.0124	2.194	0.4406	0.0224
																																				1.098	0.4945	0.021	1.098	0.5442	0.0115	2.196	0.4437	0.0233
																																				1.099	0.4942	0.0214	1.099	0.5425	0.0115	2.198	0.4455	0.0218
																																				1.1	0.4937	0.0211	1.1	0.5446	0.0103	2.2	0.4471	0.0224
																																				1.101	0.4941	0.0214	1.101	0.5474	0.0124	2.202	0.4435	0.0215
																																				1.102	0.4938	0.021	1.102	0.5469	0.0118	2.204	0.4363	0.0192
																																				1.103	0.4941	0.0208	1.103	0.5413	0.0108	2.206	0.4364	0.0203
																																				1.104	0.4941	0.0211	1.104	0.5412	0.0106	2.208	0.4429	0.0213
																																				1.105	0.4945	0.0213	1.105	0.5453	0.0112	2.21	0.4463	0.0227
																																				1.106	0.4936	0.0216	1.106	0.5481	0.0129	2.212	0.4379	0.0203
																																				1.107	0.4934	0.0212	1.107	0.5467	0.0129	2.214	0.4358	0.0201
																																				1.108	0.4927	0.0207	1.108	0.5467	0.0117	2.216	0.4457	0.0229
																																				1.109	0.493	0.0211	1.109	0.5424	0.0111	2.218	0.4348	0.021
																																				1.11	0.494	0.0214	1.11	0.542	0.0102	2.22	0.4429	0.0248
																																				1.111	0.4934	0.0213	1.111	0.5468	0.0122	2.222	0.4332	0.0222
																																				1.112	0.4936	0.0214	1.112	0.5477	0.0116	2.224	0.4399	0.0237
																																				1.113	0.4929	0.021	1.113	0.5447	0.0121	2.226	0.4398	0.0241
																																				1.114	0.4943	0.0213	1.114	0.5434	0.0116	2.228	0.4395	0.0227
																																				1.115	0.4933	0.0212	1.115	0.5452	0.0117	2.23	0.4447	0.0213
																																				1.116	0.4933	0.0213	1.116	0.5407	0.0123	2.232	0.4371	0.0191
																																				1.117	0.4942	0.0211	1.117	0.5432	0.0114	2.234	0.4465	0.023
																																				1.118	0.4931	0.0213	1.118	0.5481	0.0114	2.236	0.4512	0.022
																																				1.119	0.4937	0.0209	1.119	0.5421	0.0118	2.238	0.452	0.0212
																																				1.12	0.4934	0.0207	1.12	0.5411	0.0106	2.24	0.4485	0.0198
																																				1.121	0.4942	0.0213	1.121	0.5409	0.0105	2.242	0.4546	0.0199
																																				1.122	0.4938	0.0212	1.122	0.5432	0.0111	2.244	0.4459	0.021
																																				1.123	0.4935	0.0212	1.123	0.5433	0.0121	2.246	0.437	0.0211
																																				1.124	0.4935	0.0209	1.124	0.5415	0.0107	2.248	0.4389	0.0218
																																				1.125	0.493	0.0212	1.125	0.5448	0.0115	2.25	0.4418	0.022
																																				1.126	0.4931	0.0211	1.126	0.5396	0.0105	2.252	0.4382	0.0229
																																				1.127	0.4934	0.0213	1.127	0.5417	0.0104	2.254	0.4362	0.0242
																																				1.128	0.493	0.0214	1.128	0.547	0.011	2.256	0.4322	0.0212
																																				1.129	0.4945	0.0215	1.129	0.5453	0.0108	2.258	0.435	0.0182
																																				1.13	0.4937	0.0213	1.13	0.5416	0.0111	2.26	0.4474	0.0218
																																				1.131	0.4938	0.0208	1.131	0.5374	0.0114	2.262	0.4401	0.0226
																																				1.132	0.4937	0.0213	1.132	0.5378	0.0106	2.264	0.4448	0.0226
																																				1.133	0.4935	0.0215	1.133	0.5443	0.0117	2.266	0.4522	0.0219
																																				1.134	0.4936	0.0214	1.134	0.5426	0.0103	2.268	0.4439	0.0184
																																				1.135	0.4936	0.021	1.135	0.5467	0.0112	2.27	0.4486	0.0218
																																				1.136	0.4942	0.021	1.136	0.5401	0.0105	2.272	0.437	0.0212
																																				1.137	0.4936	0.0212	1.137	0.5406	0.0106	2.274	0.4445	0.0251
																																				1.138	0.4936	0.0215	1.138	0.5374	0.01	2.276	0.4351	0.0223
																																				1.139	0.4933	0.0214	1.139	0.5404	0.0112	2.278	0.4389	0.0233
																																				1.14	0.4938	0.0217	1.14	0.5437	0.0125	2.28	0.4374	0.0231
																																				1.141	0.4939	0.021	1.141	0.5395	0.0107	2.282	0.4402	0.0221
																																				1.142	0.4927	0.0209	1.142	0.5402	0.0118	2.284	0.4371	0.02
																																				1.143	0.4941	0.0209	1.143	0.5359	0.0103	2.286	0.4392	0.0213
																																				1.144	0.4933	0.021	1.144	0.5409	0.0111	2.288	0.4327	0.0193
																																				1.145	0.4928	0.0213	1.145	0.5451	0.0124	2.29	0.4389	0.0211
																																				1.146	0.4931	0.0213	1.146	0.5441	0.0113	2.292	0.4452	0.0228
																																				1.147	0.4938	0.0214	1.147	0.5412	0.0112	2.294	0.4416	0.0214
																																				1.148	0.4933	0.021	1.148	0.5367	0.0113	2.296	0.4469	0.0224
																																				1.149	0.4932	0.021	1.149	0.5362	0.0111	2.298	0.4483	0.0253
																																				1.15	0.4938	0.0214	1.15	0.538	0.011	2.3	0.4392	0.0229
																																				1.151	0.4929	0.0212	1.151	0.5417	0.0116	2.302	0.4341	0.021
																																				1.152	0.4936	0.0213	1.152	0.5418	0.0118	2.304	0.4413	0.0233
																																				1.153	0.4935	0.0211	1.153	0.5372	0.0106	2.306	0.4353	0.0225
																																				1.154	0.4939	0.0211	1.154	0.5324	0.0097475	2.308	0.4389	0.024
																																				1.155	0.4934	0.0213	1.155	0.5378	0.0104	2.31	0.4366	0.0239
																																				1.156	0.4933	0.0215	1.156	0.5374	0.0118	2.312	0.4372	0.0213
																																				1.157	0.4936	0.0212	1.157	0.5429	0.0114	2.314	0.4448	0.0203
																																				1.158	0.4925	0.0209	1.158	0.5391	0.0121	2.316	0.4413	0.0198
																																				1.159	0.4935	0.0212	1.159	0.5357	0.0114	2.318	0.4475	0.0224
																																				1.16	0.4928	0.021	1.16	0.5351	0.0102	2.32	0.4399	0.0204
																																				1.161	0.4928	0.0216	1.161	0.5376	0.01	2.322	0.4435	0.0222
																																				1.162	0.4933	0.0217	1.162	0.5436	0.0118	2.324	0.4467	0.0206
																																				1.163	0.493	0.0215	1.163	0.5434	0.0117	2.326	0.4426	0.0202
																																				1.164	0.4928	0.0208	1.164	0.5381	0.0103	2.328	0.431	0.0211
																																				1.165	0.4931	0.021	1.165	0.5411	0.0119	2.33	0.4411	0.026
																																				1.166	0.4933	0.0214	1.166	0.5391	0.0113	2.332	0.435	0.0236
																																				1.167	0.4931	0.0216	1.167	0.5404	0.0098118	2.334	0.4298	0.023
																																				1.168	0.4925	0.021	1.168	0.5416	0.0113	2.336	0.4364	0.0224
																																				1.169	0.4936	0.0212	1.169	0.5402	0.0116	2.338	0.4395	0.0199
																																				1.17	0.4942	0.0207	1.17	0.5382	0.0103	2.34	0.447	0.0222
																																				1.171	0.4932	0.0214	1.171	0.535	0.0101	2.342	0.4419	0.0212
																																				1.172	0.4927	0.0213	1.172	0.5369	0.0112	2.344	0.4408	0.0208
																																				1.173	0.493	0.0214	1.173	0.5414	0.0115	2.346	0.4394	0.0204
																																				1.174	0.4931	0.0212	1.174	0.5401	0.0115	2.348	0.4516	0.0217
																																				1.175	0.493	0.021	1.175	0.5348	0.0115	2.35	0.4498	0.0217
																																				1.176	0.4925	0.021	1.176	0.5385	0.0107	2.352	0.4458	0.0222
																																				1.177	0.4928	0.0213	1.177	0.5382	0.0104	2.354	0.4415	0.021
																																				1.178	0.4932	0.0216	1.178	0.5381	0.0103	2.356	0.4462	0.0218
																																				1.179	0.4926	0.0211	1.179	0.5437	0.0125	2.358	0.4429	0.022
																																				1.18	0.4942	0.0214	1.18	0.5368	0.0114	2.36	0.4434	0.0227
																																				1.181	0.4932	0.021	1.181	0.5336	0.0095412	2.362	0.4371	0.0214
																																				1.182	0.4931	0.0212	1.182	0.538	0.0098971	2.364	0.4411	0.0213
																																				1.183	0.4933	0.0212	1.183	0.5379	0.0111	2.366	0.4467	0.022
																																				1.184	0.4933	0.0214	1.184	0.5404	0.0108	2.368	0.4428	0.0205
																																				1.185	0.4931	0.0211	1.185	0.5407	0.0108	2.37	0.4414	0.0235
																																				1.186	0.4931	0.0212	1.186	0.539	0.0112	2.372	0.4425	0.025
																																				1.187	0.493	0.0212	1.187	0.5318	0.009377	2.374	0.4449	0.0244
																																				1.188	0.4932	0.0213	1.188	0.5353	0.01	2.376	0.4317	0.0192
																																				1.189	0.4936	0.0214	1.189	0.5375	0.0108	2.378	0.448	0.0203
																																				1.19	0.493	0.0217	1.19	0.537	0.0111	2.38	0.4515	0.0215
																																				1.191	0.4931	0.021	1.191	0.5364	0.0107	2.382	0.4481	0.0213
																																				1.192	0.4933	0.0212	1.192	0.5387	0.01	2.384	0.444	0.0189
																																				1.193	0.4936	0.0214	1.193	0.537	0.011	2.386	0.4484	0.0218
																																				1.194	0.4927	0.0215	1.194	0.534	0.0094104	2.388	0.4511	0.024
																																				1.195	0.4935	0.0215	1.195	0.543	0.0125	2.39	0.4426	0.0213
																																				1.196	0.4932	0.0212	1.196	0.5395	0.0113	2.392	0.4431	0.0226
																																				1.197	0.4929	0.0213	1.197	0.5385	0.0103	2.394	0.4344	0.0202
																																				1.198	0.4934	0.0213	1.198	0.5314	0.009207	2.396	0.4375	0.0203
																																				1.199	0.4936	0.0213	1.199	0.5353	0.0107	2.398	0.4447	0.0213
																																				1.2	0.4927	0.0214	1.2	0.5356	0.0107	2.4	0.4398	0.02
																																				1.201	0.493	0.0215	1.201	0.5387	0.0105	2.402	0.4406	0.0216
																																				1.202	0.4937	0.0216	1.202	0.5373	0.011	2.404	0.4359	0.0225
																																				1.203	0.4935	0.0212	1.203	0.534	0.0116	2.406	0.4319	0.0224
																																				1.204	0.4922	0.021	1.204	0.5308	0.0090543	2.408	0.4403	0.0224
																																				1.205	0.4934	0.0214	1.205	0.5358	0.0109	2.41	0.4343	0.0202
																																				1.206	0.4934	0.0214	1.206	0.5393	0.0118	2.412	0.4392	0.0213
																																				1.207	0.4932	0.0214	1.207	0.5328	0.0105	2.414	0.4356	0.0213
																																				1.208	0.493	0.0211	1.208	0.5348	0.0102	2.416	0.4385	0.0219
																																				1.209	0.4929	0.0211	1.209	0.5335	0.0105	2.418	0.4357	0.0223
																																				1.21	0.4923	0.0214	1.21	0.5326	0.0094887	2.42	0.4386	0.0246
																																				1.211	0.4916	0.0215	1.211	0.5336	0.0103	2.422	0.4384	0.0235
																																				1.212	0.4933	0.0215	1.212	0.5379	0.0102	2.424	0.4382	0.0238
																																				1.213	0.4932	0.0213	1.213	0.536	0.0101	2.426	0.4378	0.0222
																																				1.214	0.4938	0.0213	1.214	0.5332	0.0107	2.428	0.4392	0.0221
																																				1.215	0.4931	0.0212	1.215	0.5305	0.0097991	2.43	0.4419	0.0217
																																				1.216	0.4934	0.0218	1.216	0.5323	0.0102	2.432	0.4477	0.0212
																																				1.217	0.4926	0.0215	1.217	0.5341	0.0108	2.434	0.4433	0.02
																																				1.218	0.4927	0.0212	1.218	0.5356	0.0111	2.436	0.449	0.0232
																																				1.219	0.4942	0.0213	1.219	0.5305	0.01	2.438	0.4497	0.0222
																																				1.22	0.4931	0.0212	1.22	0.5278	0.0094775	2.44	0.4452	0.0215
																																				1.221	0.4937	0.0212	1.221	0.5321	0.0094081	2.442	0.4429	0.0231
																																				1.222	0.4933	0.0213	1.222	0.5346	0.01	2.444	0.4366	0.0233
																																				1.223	0.493	0.0217	1.223	0.5335	0.0112	2.446	0.4361	0.0243
																																				1.224	0.4931	0.0214	1.224	0.5351	0.0109	2.448	0.4347	0.021
																																				1.225	0.4923	0.0211	1.225	0.5338	0.0107	2.45	0.4443	0.0206
																																				1.226	0.4922	0.0211	1.226	0.5309	0.0093233	2.452	0.4393	0.0175
																																				1.227	0.4921	0.0215	1.227	0.5305	0.0109	2.454	0.4548	0.0212
																																				1.228	0.4923	0.0218	1.228	0.5329	0.0096116	2.456	0.4405	0.0215
																																				1.229	0.4936	0.0213	1.229	0.538	0.0108	2.458	0.439	0.0243
																																				1.23	0.493	0.0213	1.23	0.535	0.0109	2.46	0.4388	0.0252
																																				1.231	0.4931	0.0213	1.231	0.5299	0.0107	2.462	0.4355	0.0228
																																				1.232	0.4931	0.021	1.232	0.5286	0.0102	2.464	0.441	0.0223
																																				1.233	0.4934	0.0215	1.233	0.5316	0.0102	2.466	0.4478	0.023
																																				1.234	0.4926	0.0215	1.234	0.5355	0.0101	2.468	0.4459	0.0216
																																				1.235	0.4933	0.0216	1.235	0.5352	0.0111	2.47	0.4521	0.0206
																																				1.236	0.4934	0.0211	1.236	0.5336	0.0111	2.472	0.4503	0.019
																																				1.237	0.4928	0.0208	1.237	0.5309	0.0097283	2.474	0.4421	0.0192
																																				1.238	0.4933	0.0213	1.238	0.5256	0.0103	2.476	0.438	0.0212
																																				1.239	0.4937	0.0215	1.239	0.5304	0.0107	2.478	0.4373	0.0235
																																				1.24	0.4929	0.0214	1.24	0.5311	0.0101	2.48	0.4383	0.023
																																				1.241	0.4929	0.0209	1.241	0.53	0.0101	2.482	0.4467	0.0236
																																				1.242	0.4922	0.021	1.242	0.5294	0.01	2.484	0.4503	0.0214
																																				1.243	0.493	0.0214	1.243	0.5299	0.0102	2.486	0.4496	0.0208
																																				1.244	0.4931	0.0214	1.244	0.5315	0.0099286	2.488	0.4527	0.0254
																																				1.245	0.4935	0.0215	1.245	0.5344	0.0103	2.49	0.4377	0.0226
																																				1.246	0.4934	0.0212	1.246	0.5283	0.0105	2.492	0.4422	0.024
																																				1.247	0.4928	0.0212	1.247	0.5315	0.0104	2.494	0.4393	0.023
																																				1.248	0.4938	0.0214	1.248	0.5287	0.0101	2.496	0.4431	0.0241
																																				1.249	0.4938	0.0214	1.249	0.5263	0.0098917	2.498	0.4418	0.0248
																																				1.25	0.4923	0.0217	1.25	0.5314	0.0097847	2.5	0.4416	0.0246
																																				1.251	0.4927	0.0214	1.251	0.5299	0.0103	2.502	0.4389	0.0231
																																				1.252	0.4934	0.021	1.252	0.5307	0.0102	2.504	0.4499	0.0244
																																				1.253	0.493	0.0209	1.253	0.5278	0.0103	2.506	0.4359	0.0217
																																				1.254	0.4923	0.0214	1.254	0.5279	0.0094953	2.508	0.4471	0.0232
																																				1.255	0.4927	0.0212	1.255	0.5263	0.0094957	2.51	0.4578	0.0251
																																				1.256	0.4937	0.0215	1.256	0.5294	0.01	2.512	0.4496	0.0225
																																				1.257	0.4935	0.0214	1.257	0.5292	0.0115	2.514	0.4472	0.0211
																																				1.258	0.4919	0.0207	1.258	0.53	0.0102	2.516	0.4517	0.021
																																				1.259	0.492	0.021	1.259	0.527	0.01	2.518	0.4487	0.0196
																																				1.26	0.492	0.0213	1.26	0.527	0.0097704	2.52	0.4477	0.0218
																																				1.261	0.4916	0.0212	1.261	0.5292	0.0096813	2.522	0.4476	0.0246
																																				1.262	0.4937	0.0217	1.262	0.5277	0.0104	2.524	0.4495	0.0246
																																				1.263	0.4937	0.0216	1.263	0.5275	0.0090581	2.526	0.4409	0.0203
																																				1.264	0.4935	0.0216	1.264	0.527	0.0098412	2.528	0.4437	0.0213
																																				1.265	0.4926	0.0213	1.265	0.5266	0.0101	2.53	0.4408	0.0212
																																				1.266	0.4929	0.0218	1.266	0.5273	0.0090561	2.532	0.4422	0.0204
																																				1.267	0.4932	0.0213	1.267	0.528	0.0103	2.534	0.4387	0.0172
																																				1.268	0.4922	0.0215	1.268	0.5266	0.0094627	2.536	0.4583	0.019
																																				1.269	0.4941	0.0213	1.269	0.5282	0.0102	2.538	0.4523	0.0187
																																				1.27	0.4929	0.021	1.27	0.5249	0.0098651	2.54	0.4366	0.0204
																																				1.271	0.4937	0.021	1.271	0.5247	0.01	2.542	0.4239	0.0222
																																				1.272	0.4927	0.0213	1.272	0.5272	0.01	2.544	0.4307	0.0246
																																				1.273	0.4922	0.0214	1.273	0.5276	0.0102	2.546	0.4414	0.0243
																																				1.274	0.4931	0.0216	1.274	0.5266	0.0103	2.548	0.4444	0.022
																																				1.275	0.492	0.0209	1.275	0.5252	0.009925	2.55	0.4432	0.0214
																																				1.276	0.4916	0.0215	1.276	0.5267	0.0103	2.552	0.4282	0.0196
																																				1.277	0.4928	0.0214	1.277	0.5263	0.0099379	2.554	0.4344	0.022
																																				1.278	0.492	0.0216	1.278	0.5299	0.0094246	2.556	0.4397	0.024
																																				1.279	0.4933	0.0215	1.279	0.5272	0.0098887	2.558	0.4359	0.0215
																																				1.28	0.494	0.0211	1.28	0.5252	0.0097149	2.56	0.4426	0.0214
																																				1.281	0.4927	0.0211	1.281	0.5269	0.0097728	2.562	0.4517	0.0225
																																				1.282	0.4932	0.0211	1.282	0.5239	0.0090125	2.564	0.4467	0.0237
																																				1.283	0.4926	0.0215	1.283	0.5295	0.01	2.566	0.4438	0.0248
																																				1.284	0.4927	0.0215	1.284	0.5266	0.0088555	2.568	0.4274	0.0222
																																				1.285	0.4928	0.0213	1.285	0.5301	0.0105	2.57	0.4359	0.0249
																																				1.286	0.4938	0.0214	1.286	0.5241	0.0104	2.572	0.4345	0.0234
																																				1.287	0.4936	0.021	1.287	0.5237	0.0092287	2.574	0.4341	0.0225
																																				1.288	0.4934	0.0212	1.288	0.525	0.008989	2.576	0.4322	0.0206
																																				1.289	0.4921	0.0216	1.289	0.5273	0.0086544	2.578	0.4371	0.0213
																																				1.29	0.4923	0.0215	1.29	0.5255	0.0091894	2.58	0.4423	0.0258
																																				1.291	0.4929	0.0215	1.291	0.5275	0.01	2.582	0.4469	0.0236
																																				1.292	0.4925	0.0211	1.292	0.5241	0.0094621	2.584	0.4547	0.0229
																																				1.293	0.493	0.0214	1.293	0.5257	0.0097494	2.586	0.4457	0.019
																																				1.294	0.4925	0.0214	1.294	0.5243	0.0094716	2.588	0.4529	0.0213
																																				1.295	0.4926	0.0216	1.295	0.5283	0.0103	2.59	0.4447	0.0217
																																				1.296	0.4931	0.0213	1.296	0.5282	0.011	2.592	0.452	0.0251
																																				1.297	0.4932	0.0217	1.297	0.5261	0.0093487	2.594	0.4492	0.0236
																																				1.298	0.4929	0.0212	1.298	0.5246	0.009476	2.596	0.4439	0.0208
																																				1.299	0.4922	0.0215	1.299	0.5248	0.0093103	2.598	0.4541	0.0216
																																				1.3	0.4914	0.0216	1.3	0.5241	0.0094231	2.6	0.448	0.0211
																																				1.301	0.4924	0.0216	1.301	0.5264	0.0093883	2.602	0.4441	0.0206
																																				1.302	0.4929	0.0212	1.302	0.5268	0.0098709	2.604	0.4427	0.0241
																																				1.303	0.4931	0.0211	1.303	0.524	0.0092744	2.606	0.4318	0.0226
																																				1.304	0.4934	0.0214	1.304	0.5244	0.0088433	2.608	0.4436	0.0253
																																				1.305	0.4925	0.0211	1.305	0.5256	0.0089117	2.61	0.4438	0.0235
																																				1.306	0.4925	0.0217	1.306	0.5271	0.009566	2.612	0.4457	0.0245
																																				1.307	0.4922	0.0216	1.307	0.5269	0.0103	2.614	0.4422	0.0227
																																				1.308	0.4919	0.021	1.308	0.5253	0.0093163	2.616	0.4452	0.0224
																																				1.309	0.4929	0.0214	1.309	0.522	0.0084324	2.618	0.4473	0.0223
																																				1.31	0.4926	0.0214	1.31	0.5258	0.0085692	2.62	0.4396	0.0221
																																				1.311	0.4919	0.0214	1.311	0.5251	0.0093495	2.622	0.4342	0.0207
																																				1.312	0.4923	0.0214	1.312	0.5275	0.0098918	2.624	0.4425	0.0203
																																				1.313	0.4931	0.0216	1.313	0.5255	0.0086439	2.626	0.4489	0.0222
																																				1.314	0.4934	0.0211	1.314	0.5225	0.0089738	2.628	0.4446	0.0219
																																				1.315	0.4933	0.0214	1.315	0.5248	0.0094477	2.63	0.4513	0.0247
																																				1.316	0.493	0.0219	1.316	0.5238	0.0097836	2.632	0.4451	0.024
																																				1.317	0.4921	0.0214	1.317	0.5223	0.0094448	2.634	0.4371	0.0223
																																				1.318	0.4921	0.0215	1.318	0.5258	0.0087302	2.636	0.4353	0.0221
																																				1.319	0.4937	0.0213	1.319	0.5214	0.0094276	2.638	0.4292	0.0218
																																				1.32	0.4935	0.0211	1.32	0.525	0.0096085	2.64	0.4441	0.024
																																				1.321	0.4937	0.0214	1.321	0.523	0.0090468	2.642	0.4468	0.0226
																																				1.322	0.4933	0.0214	1.322	0.5231	0.0084048	2.644	0.4472	0.0203
																																				1.323	0.4935	0.0216	1.323	0.5245	0.0097266	2.646	0.4495	0.0205
																																				1.324	0.4928	0.0215	1.324	0.5232	0.0092901	2.648	0.4573	0.0212
																																				1.325	0.4933	0.0211	1.325	0.5226	0.0096318	2.65	0.4519	0.0204
																																				1.326	0.4927	0.0212	1.326	0.5191	0.0095632	2.652	0.4346	0.0191
																																				1.327	0.4912	0.0212	1.327	0.5194	0.0085919	2.654	0.4405	0.022
																																				1.328	0.4915	0.0217	1.328	0.523	0.0085781	2.656	0.4399	0.0209
																																				1.329	0.4942	0.0213	1.329	0.5261	0.0101	2.658	0.4354	0.0195
																																				1.33	0.4937	0.0216	1.33	0.5215	0.0097771	2.66	0.451	0.0215
																																				1.331	0.4924	0.0211	1.331	0.5213	0.0098098	2.662	0.4486	0.021
																																				1.332	0.4921	0.0214	1.332	0.5199	0.0087779	2.664	0.438	0.0188
																																				1.333	0.4924	0.0217	1.333	0.5222	0.0091952	2.666	0.4534	0.0237
																																				1.334	0.4932	0.0218	1.334	0.5238	0.0082777	2.668	0.4378	0.0204
																																				1.335	0.4932	0.0213	1.335	0.5226	0.0098095	2.67	0.4515	0.0236
																																				1.336	0.4939	0.0214	1.336	0.5204	0.009679	2.672	0.4443	0.0233
																																				1.337	0.4925	0.021	1.337	0.5197	0.0092545	2.674	0.4412	0.022
																																				1.338	0.493	0.0216	1.338	0.5203	0.0083986	2.676	0.4377	0.0208
																																				1.339	0.4935	0.0217	1.339	0.5232	0.0094074	2.678	0.4438	0.0219
																																				1.34	0.4926	0.0213	1.34	0.5203	0.0094467	2.68	0.4441	0.0238
																																				1.341	0.4923	0.0209	1.341	0.5248	0.0101	2.682	0.4447	0.0237
																																				1.342	0.4927	0.0211	1.342	0.5224	0.0084046	2.684	0.4426	0.0226
																																				1.343	0.4933	0.0217	1.343	0.5168	0.008504	2.686	0.4442	0.0238
																																				1.344	0.4919	0.0213	1.344	0.5202	0.0087541	2.688	0.4412	0.024
																																				1.345	0.4921	0.0217	1.345	0.5232	0.0089325	2.69	0.44	0.0225
																																				1.346	0.4942	0.0218	1.346	0.5234	0.0092234	2.692	0.4442	0.0233
																																				1.347	0.4929	0.0216	1.347	0.5218	0.0096591	2.694	0.4442	0.0224
																																				1.348	0.493	0.0211	1.348	0.5229	0.01	2.696	0.4532	0.0226
																																				1.349	0.4919	0.0212	1.349	0.5194	0.0083965	2.698	0.4498	0.0215
																																				1.35	0.4927	0.0218	1.35	0.5199	0.0087799	2.7	0.4495	0.0219
																																				1.351	0.4928	0.0214	1.351	0.5233	0.0092705	2.702	0.4389	0.0197
																																				1.352	0.4936	0.0214	1.352	0.5232	0.0092464	2.704	0.4489	0.0224
																																				1.353	0.4934	0.0212	1.353	0.5181	0.0093798	2.706	0.4527	0.0227
																																				1.354	0.4925	0.0211	1.354	0.5186	0.0083891	2.708	0.4504	0.0225
																																				1.355	0.4924	0.0214	1.355	0.5218	0.0098931	2.71	0.4511	0.0221
																																				1.356	0.4936	0.0216	1.356	0.52	0.0091004	2.712	0.4555	0.0193
																																				1.357	0.4931	0.0212	1.357	0.5241	0.0112	2.714	0.4536	0.0202
																																				1.358	0.4917	0.0212	1.358	0.5218	0.0096634	2.716	0.456	0.0232
																																				1.359	0.4929	0.0215	1.359	0.5185	0.0087631	2.718	0.4458	0.019
																																				1.36	0.4926	0.0214	1.36	0.5183	0.0085075	2.72	0.4584	0.0201
																																				1.361	0.4916	0.0218	1.361	0.5209	0.0097674	2.722	0.4553	0.0202
																																				1.362	0.4939	0.0216	1.362	0.524	0.0108	2.724	0.4511	0.0214
																																				1.363	0.4919	0.0213	1.363	0.5191	0.0101	2.726	0.4371	0.0213
																																				1.364	0.4935	0.0215	1.364	0.5182	0.0097871	2.728	0.4364	0.0239
																																				1.365	0.4925	0.0212	1.365	0.5194	0.0090475	2.73	0.4504	0.0279
																																				1.366	0.4928	0.0217	1.366	0.5179	0.0091187	2.732	0.439	0.0211
																																				1.367	0.4927	0.0218	1.367	0.5198	0.008706	2.734	0.4478	0.0213
																																				1.368	0.4928	0.0211	1.368	0.5198	0.0084633	2.736	0.4455	0.0231
																																				1.369	0.4925	0.0214	1.369	0.5197	0.009323	2.738	0.4386	0.0215
																																				1.37	0.493	0.0211	1.37	0.5167	0.0092723	2.74	0.4419	0.0212
																																				1.371	0.4929	0.0214	1.371	0.5169	0.009124	2.742	0.4504	0.0237
																																				1.372	0.4925	0.021	1.372	0.5184	0.0090027	2.744	0.4506	0.0206
																																				1.373	0.4928	0.0213	1.373	0.5194	0.0095636	2.746	0.451	0.0209
																																				1.374	0.4922	0.0215	1.374	0.5204	0.0091238	2.748	0.4534	0.0223
																																				1.375	0.4933	0.0215	1.375	0.5189	0.0093438	2.75	0.4509	0.0223
																																				1.376	0.4918	0.0213	1.376	0.5176	0.0087211	2.752	0.4481	0.0225
																																				1.377	0.4926	0.0213	1.377	0.5162	0.0087637	2.754	0.44	0.0225
																																				1.378	0.4925	0.0222	1.378	0.519	0.0091463	2.756	0.4418	0.0222
																																				1.379	0.4933	0.0218	1.379	0.5194	0.0090424	2.758	0.4516	0.0219
																																				1.38	0.4927	0.0215	1.38	0.5177	0.01	2.76	0.443	0.0191
																																				1.381	0.4929	0.0214	1.381	0.5174	0.0094866	2.762	0.4567	0.0212
																																				1.382	0.4926	0.0212	1.382	0.5172	0.0094676	2.764	0.4519	0.0191
																																				1.383	0.4923	0.0217	1.383	0.5165	0.0090573	2.766	0.4488	0.02
																																				1.384	0.4931	0.0215	1.384	0.5172	0.0088661	2.768	0.4447	0.0217
																																				1.385	0.4935	0.0214	1.385	0.5189	0.008968	2.77	0.4352	0.0201
																																				1.386	0.4935	0.0215	1.386	0.5174	0.008774	2.772	0.4497	0.0229
																																				1.387	0.4925	0.0209	1.387	0.515	0.0089595	2.774	0.45	0.0221
																																				1.388	0.4921	0.0214	1.388	0.5159	0.0093979	2.776	0.4506	0.0199
																																				1.389	0.493	0.0217	1.389	0.519	0.0093984	2.778	0.4541	0.0201
																																				1.39	0.4928	0.0214	1.39	0.5166	0.0090243	2.78	0.4614	0.0231
																																				1.391	0.4925	0.0214	1.391	0.5191	0.0095886	2.782	0.4439	0.0203
																																				1.392	0.4915	0.0213	1.392	0.5164	0.0097133	2.784	0.4471	0.0221
																																				1.393	0.4926	0.0213	1.393	0.517	0.0089011	2.786	0.4419	0.0196
																																				1.394	0.4909	0.0213	1.394	0.5173	0.0092205	2.788	0.4345	0.0173
																																				1.395	0.4931	0.0215	1.395	0.5156	0.0090899	2.79	0.4439	0.0222
																																				1.396	0.4932	0.0215	1.396	0.5184	0.0090905	2.792	0.4435	0.0243
																																				1.397	0.4937	0.0217	1.397	0.5163	0.0088008	2.794	0.4393	0.0251
																																				1.398	0.4934	0.0217	1.398	0.5164	0.0092506	2.796	0.4398	0.0243
																																				1.399	0.4915	0.0214	1.399	0.5143	0.0092314	2.798	0.4442	0.0217
																																				1.4	0.493	0.0218	1.4	0.5159	0.0091434	2.8	0.451	0.0207
																																				1.401	0.4917	0.0215	1.401	0.5185	0.0086773	2.802	0.4511	0.0204
																																				1.402	0.4936	0.0216	1.402	0.5197	0.0084763	2.804	0.4563	0.0216
																																				1.403	0.4936	0.0214	1.403	0.5161	0.0090319	2.806	0.4564	0.0203
																																				1.404	0.4935	0.0217	1.404	0.516	0.0089599	2.808	0.4549	0.0197
																																				1.405	0.4918	0.0213	1.405	0.517	0.0083028	2.81	0.4549	0.022
																																				1.406	0.4929	0.0216	1.406	0.5178	0.009817	2.812	0.4462	0.0198
																																				1.407	0.4928	0.0215	1.407	0.519	0.0095551	2.814	0.4538	0.0222
																																				1.408	0.4918	0.0211	1.408	0.5153	0.009473	2.816	0.4387	0.0207
																																				1.409	0.4925	0.0215	1.409	0.5163	0.0089624	2.818	0.4424	0.0215
																																				1.41	0.4923	0.0213	1.41	0.5149	0.0091362	2.82	0.4435	0.0219
																																				1.411	0.4921	0.0216	1.411	0.5171	0.0089229	2.822	0.4515	0.0244
																																				1.412	0.4926	0.0216	1.412	0.5198	0.0085393	2.824	0.4488	0.0225
																																				1.413	0.4925	0.0213	1.413	0.5168	0.0097817	2.826	0.4523	0.0257
																																				1.414	0.493	0.0213	1.414	0.5141	0.0087567	2.828	0.4431	0.0241
																																				1.415	0.4932	0.0217	1.415	0.5117	0.008464	2.83	0.444	0.0227
																																				1.416	0.4912	0.022	1.416	0.5132	0.0081679	2.832	0.4535	0.0221
																																				1.417	0.4924	0.0214	1.417	0.5171	0.0088891	2.834	0.4464	0.0226
																																				1.418	0.4932	0.0212	1.418	0.5183	0.0091782	2.836	0.446	0.0235
																																				1.419	0.4938	0.0217	1.419	0.5147	0.0082207	2.838	0.4427	0.0229
																																				1.42	0.4931	0.0213	1.42	0.5108	0.0087697	2.84	0.4427	0.0219
																																				1.421	0.4927	0.0214	1.421	0.511	0.0087948	2.842	0.4402	0.0203
																																				1.422	0.493	0.0215	1.422	0.5143	0.0078959	2.844	0.4472	0.0231
																																				1.423	0.4922	0.0213	1.423	0.515	0.0095184	2.846	0.4541	0.0249
																																				1.424	0.4931	0.0214	1.424	0.5157	0.0094515	2.848	0.4476	0.0218
																																				1.425	0.4924	0.0215	1.425	0.5158	0.0084484	2.85	0.445	0.0234
																																				1.426	0.4923	0.0216	1.426	0.5147	0.0086698	2.852	0.4401	0.02
																																				1.427	0.4922	0.0215	1.427	0.516	0.0086606	2.854	0.4436	0.0223
																																				1.428	0.4919	0.0216	1.428	0.5169	0.0083639	2.856	0.4413	0.0225
																																				1.429	0.4934	0.0217	1.429	0.5163	0.0084824	2.858	0.4453	0.0214
																																				1.43	0.493	0.0212	1.43	0.5151	0.0088659	2.86	0.4476	0.0191
																																				1.431	0.4927	0.0216	1.431	0.5124	0.0080419	2.862	0.4495	0.0197
																																				1.432	0.4928	0.0215	1.432	0.5124	0.0088626	2.864	0.4417	0.0204
																																				1.433	0.4928	0.0218	1.433	0.5125	0.0088033	2.866	0.4452	0.0226
																																				1.434	0.493	0.0216	1.434	0.5145	0.0091136	2.868	0.4419	0.0214
																																				1.435	0.4928	0.0216	1.435	0.5154	0.0091908	2.87	0.4468	0.0216
																																				1.436	0.4925	0.0213	1.436	0.514	0.0084953	2.872	0.4421	0.0206
																																				1.437	0.4916	0.0212	1.437	0.5125	0.0083639	2.874	0.4467	0.0232
																																				1.438	0.4923	0.0218	1.438	0.5126	0.0082424	2.876	0.454	0.0254
																																				1.439	0.4924	0.0216	1.439	0.5131	0.0081522	2.878	0.4461	0.0223
																																				1.44	0.4925	0.0216	1.44	0.5122	0.0087838	2.88	0.448	0.0237
																																				1.441	0.4928	0.0215	1.441	0.5132	0.0087157	2.882	0.4471	0.0232
																																				1.442	0.4917	0.0211	1.442	0.514	0.0084372	2.884	0.4388	0.0203
																																				1.443	0.4929	0.0215	1.443	0.5114	0.0082141	2.886	0.4433	0.0196
																																				1.444	0.492	0.0219	1.444	0.5111	0.0082225	2.888	0.451	0.0201
																																				1.445	0.4928	0.0217	1.445	0.5128	0.0084562	2.89	0.4621	0.0249
																																				1.446	0.4922	0.0216	1.446	0.5143	0.0087623	2.892	0.4437	0.0222
																																				1.447	0.494	0.0217	1.447	0.5132	0.0087232	2.894	0.4382	0.0212
																																				1.448	0.492	0.0211	1.448	0.5124	0.0081115	2.896	0.4434	0.021
																																				1.449	0.4921	0.0214	1.449	0.5114	0.008156	2.898	0.4477	0.0228
																																				1.45	0.4926	0.0217	1.45	0.5114	0.0082978	2.9	0.4539	0.0226
																																				1.451	0.4922	0.0218	1.451	0.5137	0.0082477	2.902	0.4466	0.0213
																																				1.452	0.4934	0.0216	1.452	0.5116	0.009317	2.904	0.4456	0.0223
																																				1.453	0.492	0.0211	1.453	0.5099	0.0082515	2.906	0.4437	0.0216
																																				1.454	0.4919	0.0211	1.454	0.5116	0.0072559	2.908	0.4511	0.0222
																																				1.455	0.4921	0.0216	1.455	0.51	0.0085093	2.91	0.4522	0.022
																																				1.456	0.4931	0.0217	1.456	0.5133	0.0081703	2.912	0.449	0.022
																																				1.457	0.4929	0.0216	1.457	0.5137	0.0085209	2.914	0.4358	0.0215
																																				1.458	0.4917	0.0212	1.458	0.5116	0.0086531	2.916	0.4429	0.0231
																																				1.459	0.4927	0.0214	1.459	0.509	0.0079316	2.918	0.4325	0.0202
																																				1.46	0.4918	0.0216	1.46	0.51	0.0078967	2.92	0.4497	0.0227
																																				1.461	0.492	0.0214	1.461	0.515	0.0079137	2.922	0.4516	0.0221
																																				1.462	0.4924	0.022	1.462	0.515	0.0091521	2.924	0.4439	0.0189
																																				1.463	0.4928	0.0218	1.463	0.5121	0.0085856	2.926	0.4497	0.0219
																																				1.464	0.4933	0.0216	1.464	0.5105	0.0082051	2.928	0.4458	0.0238
																																				1.465	0.4929	0.0217	1.465	0.5102	0.0078902	2.93	0.4482	0.0238
																																				1.466	0.4929	0.0218	1.466	0.5107	0.0082737	2.932	0.4457	0.022
																																				1.467	0.4919	0.0215	1.467	0.5117	0.008053	2.934	0.4568	0.022
																																				1.468	0.4926	0.0216	1.468	0.515	0.0091217	2.936	0.4543	0.0202
																																				1.469	0.4932	0.0213	1.469	0.511	0.0080828	2.938	0.4535	0.0207
																																				1.47	0.4928	0.0212	1.47	0.5087	0.0080024	2.94	0.4424	0.0218
																																				1.471	0.4934	0.0217	1.471	0.5079	0.007343	2.942	0.4339	0.0218
																																				1.472	0.4927	0.0217	1.472	0.5101	0.0080421	2.944	0.4407	0.0215
																																				1.473	0.4927	0.0216	1.473	0.5139	0.0087797	2.946	0.4546	0.0227
																																				1.474	0.493	0.0217	1.474	0.5128	0.0084276	2.948	0.4566	0.0224
																																				1.475	0.4922	0.0216	1.475	0.5102	0.0079334	2.95	0.4403	0.0231
																																				1.476	0.4919	0.0212	1.476	0.5098	0.0079069	2.952	0.4239	0.0218
																																				1.477	0.4912	0.0215	1.477	0.5102	0.0075927	2.954	0.4448	0.0265
																																				1.478	0.493	0.0217	1.478	0.5113	0.0075492	2.956	0.4411	0.0243
																																				1.479	0.4931	0.022	1.479	0.5109	0.0084007	2.958	0.4493	0.0246
																																				1.48	0.4927	0.0214	1.48	0.5114	0.0088964	2.96	0.4436	0.0218
																																				1.481	0.4926	0.0216	1.481	0.5116	0.0085033	2.962	0.4513	0.0235
																																				1.482	0.4925	0.0214	1.482	0.5082	0.0078661	2.964	0.4556	0.0232
																																				1.483	0.4926	0.022	1.483	0.5097	0.0077312	2.966	0.4604	0.0221
																																				1.484	0.4934	0.0219	1.484	0.5111	0.0086072	2.968	0.4562	0.0189
																																				1.485	0.4933	0.0216	1.485	0.5114	0.007886	2.97	0.4605	0.0203
																																				1.486	0.4931	0.0217	1.486	0.5095	0.0080596	2.972	0.4594	0.0218
																																				1.487	0.4921	0.0214	1.487	0.509	0.0075128	2.974	0.4525	0.0222
																																				1.488	0.4929	0.0217	1.488	0.5063	0.0077169	2.976	0.4529	0.0235
																																				1.489	0.4926	0.0216	1.489	0.5084	0.0080675	2.978	0.4503	0.0233
																																				1.49	0.4927	0.0217	1.49	0.5113	0.0088512	2.98	0.4565	0.0246
																																				1.491	0.4924	0.0214	1.491	0.5103	0.0083734	2.982	0.4534	0.0223
																																				1.492	0.4917	0.0216	1.492	0.5089	0.0078209	2.984	0.4427	0.0192
																																				1.493	0.4929	0.0215	1.493	0.509	0.0073229	2.986	0.4519	0.0226
																																				1.494	0.491	0.0213	1.494	0.5079	0.00756	2.988	0.4549	0.0213
																																				1.495	0.4931	0.0217	1.495	0.5109	0.0081499	2.99	0.4546	0.0216
																																				1.496	0.4928	0.0218	1.496	0.5115	0.0088306	2.992	0.4497	0.0214
																																				1.497	0.4922	0.0218	1.497	0.5081	0.0080738	2.994	0.4509	0.0223
																																				1.498	0.4926	0.0217	1.498	0.5082	0.0085531	2.996	0.4495	0.0226
																																				1.499	0.4921	0.0214	1.499	0.5075	0.0079855	2.998	0.4453	0.0243
																																				1.5	0.4923	0.0219	1.5	0.5102	0.0083492	3	0.4384	0.0233
																																				1.501	0.4919	0.0215	1.501	0.5117	0.0080042	3.002	0.4411	0.0215
																																				1.502	0.4932	0.0217	1.502	0.5093	0.0087816	3.004	0.4438	0.0208
																																				1.503	0.4928	0.0217	1.503	0.5077	0.0073669	3.006	0.4537	0.0199
																																				1.504	0.493	0.0213	1.504	0.5066	0.0073531	3.008	0.4499	0.02
																																				1.505	0.4917	0.0218	1.505	0.5083	0.0081747	3.01	0.4456	0.0215
																																				1.506	0.4929	0.022	1.506	0.5103	0.0088835	3.012	0.4445	0.0252
																																				1.507	0.4934	0.022	1.507	0.5083	0.0094625	3.014	0.4335	0.0227
																																				1.508	0.4921	0.0212	1.508	0.5074	0.0086925	3.016	0.4294	0.0209
																																				1.509	0.4921	0.0215	1.509	0.5079	0.0079248	3.018	0.4443	0.024
																																				1.51	0.4909	0.0215	1.51	0.5099	0.0078855	3.02	0.4474	0.0234
																																				1.511	0.4921	0.0217	1.511	0.5069	0.0072464	3.022	0.4398	0.0204
																																				1.512	0.4937	0.0222	1.512	0.5097	0.0086931	3.024	0.447	0.023
																																				1.513	0.4935	0.0219	1.513	0.509	0.0087036	3.026	0.4446	0.0208
																																				1.514	0.4926	0.0217	1.514	0.5076	0.0083174	3.028	0.4515	0.0224
																																				1.515	0.4933	0.022	1.515	0.5079	0.0077935	3.03	0.4534	0.0224
																																				1.516	0.493	0.0224	1.516	0.5076	0.0082964	3.032	0.4517	0.0217
																																				1.517	0.4921	0.0218	1.517	0.5085	0.008906	3.034	0.4441	0.0205
																																				1.518	0.4931	0.0219	1.518	0.5116	0.0084477	3.036	0.4417	0.0217
																																				1.519	0.4936	0.0216	1.519	0.5078	0.0077614	3.038	0.4414	0.0211
																																				1.52	0.4924	0.0217	1.52	0.5065	0.0085567	3.04	0.4586	0.0246
																																				1.521	0.4928	0.0216	1.521	0.5052	0.0077992	3.042	0.4537	0.0242
																																				1.522	0.4925	0.0214	1.522	0.5069	0.0080249	3.044	0.4493	0.0209
																																				1.523	0.4926	0.0217	1.523	0.5081	0.0091945	3.046	0.4538	0.0235
																																				1.524	0.4935	0.0219	1.524	0.509	0.0080795	3.048	0.444	0.0223
																																				1.525	0.4931	0.0216	1.525	0.5078	0.0073654	3.05	0.4449	0.024
																																				1.526	0.4917	0.0216	1.526	0.5053	0.0077301	3.052	0.4295	0.0205
																																				1.527	0.4916	0.0215	1.527	0.5067	0.0074326	3.054	0.4438	0.0248
																																				1.528	0.4922	0.022	1.528	0.5057	0.007963	3.056	0.448	0.024
																																				1.529	0.4927	0.0218	1.529	0.5082	0.0090004	3.058	0.444	0.021
																																				1.53	0.4926	0.022	1.53	0.5078	0.0084024	3.06	0.4534	0.0206
																																				1.531	0.4925	0.0213	1.531	0.5057	0.0073341	3.062	0.4534	0.0234
																																				1.532	0.4918	0.0215	1.532	0.5054	0.0076728	3.064	0.4365	0.0201
																																				1.533	0.4933	0.022	1.533	0.5066	0.0084283	3.066	0.4433	0.0218
																																				1.534	0.492	0.0215	1.534	0.5062	0.0086537	3.068	0.4561	0.0249
																																				1.535	0.4927	0.0217	1.535	0.5091	0.0086136	3.07	0.4794	0.0289
																																				1.536	0.4932	0.0217	1.536	0.5086	0.0082743	3.072	0.4503	0.0224
																																				1.537	0.4926	0.0214	1.537	0.5059	0.0078491	3.074	0.4482	0.021
																																				1.538	0.4925	0.0218	1.538	0.5047	0.0081576	3.076	0.4421	0.0216
																																				1.539	0.4925	0.0217	1.539	0.5064	0.0080945	3.078	0.4498	0.0245
																																				1.54	0.4931	0.0219	1.54	0.5066	0.0088196	3.08	0.4559	0.0265
																																				1.541	0.4918	0.0216	1.541	0.5055	0.0083172	3.082	0.4465	0.0233
																																				1.542	0.4922	0.0215	1.542	0.5068	0.007754	3.084	0.4369	0.0218
																																				1.543	0.4916	0.0218	1.543	0.5062	0.0077623	3.086	0.4347	0.0229
																																				1.544	0.4922	0.0218	1.544	0.5065	0.0080953	3.088	0.4345	0.023
																																				1.545	0.4921	0.0217	1.545	0.507	0.0090094	3.09	0.4435	0.023
																																				1.546	0.4931	0.0217	1.546	0.5085	0.0097513	3.092	0.4476	0.0239
																																				1.547	0.4928	0.0218	1.547	0.507	0.0087806	3.094	0.4522	0.0244
																																				1.548	0.493	0.0216	1.548	0.5035	0.0084991	3.096	0.4531	0.0236
																																				1.549	0.4928	0.0215	1.549	0.5055	0.0089995	3.098	0.4503	0.0207
																																				1.55	0.4927	0.022	1.55	0.5057	0.0085154	3.1	0.4532	0.021
																																				1.551	0.4929	0.022	1.551	0.5053	0.0082758	3.102	0.446	0.0211
																																				1.552	0.4926	0.0218	1.552	0.5066	0.0073909	3.104	0.449	0.0224
																																				1.553	0.4933	0.0216	1.553	0.504	0.0076748	3.106	0.439	0.0199
																																				1.554	0.4918	0.0217	1.554	0.5013	0.0073517	3.108	0.4508	0.0228
																																				1.555	0.4925	0.0217	1.555	0.5031	0.0080805	3.11	0.4455	0.0236
																																				1.556	0.4934	0.022	1.556	0.508	0.008067	3.112	0.4362	0.024
																																				1.557	0.4924	0.0217	1.557	0.5068	0.008057	3.114	0.4421	0.0267
																																				1.558	0.4924	0.0216	1.558	0.5046	0.0083489	3.116	0.4318	0.0212
																																				1.559	0.4922	0.0213	1.559	0.5051	0.0076403	3.118	0.4425	0.0227
																																				1.56	0.4922	0.0216	1.56	0.5034	0.0070677	3.12	0.4431	0.025
																																				1.561	0.4914	0.0218	1.561	0.5034	0.0075884	3.122	0.4381	0.0225
																																				1.562	0.4923	0.0219	1.562	0.5061	0.0075561	3.124	0.4415	0.0238
																																				1.563	0.4931	0.0217	1.563	0.5071	0.00797	3.126	0.4424	0.0246
																																				1.564	0.4931	0.0218	1.564	0.5051	0.0075112	3.128	0.4449	0.0257
																																				1.565	0.493	0.0217	1.565	0.5031	0.0077339	3.13	0.4403	0.0247
																																				1.566	0.4919	0.0217	1.566	0.5027	0.0070324	3.132	0.4487	0.0238
																																				1.567	0.4922	0.0219	1.567	0.5045	0.0082387	3.134	0.4475	0.0236
																																				1.568	0.492	0.0219	1.568	0.5058	0.0078075	3.136	0.4485	0.0244
																																				1.569	0.4926	0.0215	1.569	0.5044	0.0073021	3.138	0.4596	0.0239
																																				1.57	0.4925	0.0217	1.57	0.5013	0.0074687	3.14	0.4612	0.0223
																																				1.571	0.4922	0.0218	1.571	0.5029	0.0076741	3.142	0.4557	0.021
																																				1.572	0.4923	0.0218	1.572	0.5047	0.0081827	3.144	0.4644	0.0244
																																				1.573	0.4923	0.0216	1.573	0.5019	0.0077846	3.146	0.4511	0.0225
																																				1.574	0.4922	0.0216	1.574	0.5026	0.0075224	3.148	0.45	0.0252
																																				1.575	0.4921	0.0213	1.575	0.5037	0.0074337	3.15	0.445	0.0234
																																				1.576	0.4921	0.0213	1.576	0.5019	0.0069876	3.152	0.4413	0.0218
																																				1.577	0.4926	0.0218	1.577	0.5031	0.007074	3.154	0.4524	0.0238
																																				1.578	0.4918	0.0218	1.578	0.5037	0.0076441	3.156	0.4441	0.0229
																																				1.579	0.4928	0.022	1.579	0.5047	0.0082913	3.158	0.4401	0.0223
																																				1.58	0.4931	0.0218	1.58	0.5044	0.0085043	3.16	0.4473	0.0223
																																				1.581	0.4926	0.0214	1.581	0.5022	0.0076968	3.162	0.4531	0.0238
																																				1.582	0.4921	0.0218	1.582	0.5022	0.0078871	3.164	0.4479	0.0215
																																				1.583	0.492	0.0219	1.583	0.5021	0.0078384	3.166	0.4502	0.0226
																																				1.584	0.4922	0.0219	1.584	0.503	0.008344	3.168	0.4508	0.0248
																																				1.585	0.4924	0.0213	1.585	0.5058	0.0078891	3.17	0.4475	0.0241
																																				1.586	0.4928	0.0216	1.586	0.5035	0.0068073	3.172	0.4408	0.025
																																				1.587	0.4925	0.0215	1.587	0.5016	0.0068328	3.174	0.4515	0.0275
																																				1.588	0.4935	0.022	1.588	0.5039	0.0072858	3.176	0.4423	0.0246
																																				1.589	0.4924	0.0217	1.589	0.5026	0.0080827	3.178	0.4503	0.0254
																																				1.59	0.4923	0.022	1.59	0.5045	0.0081152	3.18	0.4568	0.0246
																																				1.591	0.4922	0.0216	1.591	0.504	0.0083665	3.182	0.4474	0.0203
																																				1.592	0.4917	0.0212	1.592	0.5026	0.0075917	3.184	0.4473	0.0217
																																				1.593	0.4924	0.0216	1.593	0.4998	0.0073161	3.186	0.4428	0.0236
																																				1.594	0.4915	0.0213	1.594	0.5008	0.0065078	3.188	0.4461	0.0225
																																				1.595	0.4929	0.0222	1.595	0.5046	0.0074002	3.19	0.4536	0.0243
																																				1.596	0.4925	0.0216	1.596	0.5045	0.0082412	3.192	0.4431	0.024
																																				1.597	0.4928	0.0218	1.597	0.501	0.0080398	3.194	0.4488	0.0238
																																				1.598	0.4928	0.0218	1.598	0.5003	0.0071963	3.196	0.4538	0.0256
																																				1.599	0.4924	0.0216	1.599	0.5021	0.0072478	3.198	0.4441	0.0219
																																				1.6	0.4928	0.0223	1.6	0.4992	0.0077422	3.2	0.4459	0.0226
																																				1.601	0.4924	0.0218	1.601	0.5033	0.0080467	3.202	0.4342	0.022
																																				1.602	0.4928	0.0218	1.602	0.5047	0.0081086	3.204	0.4314	0.0207
																																				1.603	0.4932	0.0215	1.603	0.4992	0.0078687	3.206	0.4489	0.0223
																																				1.604	0.4916	0.0214	1.604	0.4999	0.0070852	3.208	0.441	0.0196
																																				1.605	0.4918	0.0216	1.605	0.5002	0.0075103	3.21	0.4426	0.0212
																																				1.606	0.4923	0.0217	1.606	0.501	0.0077799	3.212	0.4463	0.0223
																																				1.607	0.4928	0.0218	1.607	0.5016	0.0083667	3.214	0.4398	0.022
																																				1.608	0.492	0.0217	1.608	0.5014	0.007355	3.216	0.4432	0.0216
																																				1.609	0.4915	0.0214	1.609	0.5005	0.0071944	3.218	0.4487	0.0201
																																				1.61	0.492	0.0217	1.61	0.4988	0.0075888	3.22	0.4526	0.0202
																																				1.611	0.4921	0.0218	1.611	0.5026	0.0070743	3.222	0.4491	0.0199
																																				1.612	0.4926	0.0218	1.612	0.5017	0.0077809	3.224	0.4517	0.0222
																																				1.613	0.4926	0.0217	1.613	0.5032	0.0075676	3.226	0.4451	0.0214
																																				1.614	0.4935	0.0218	1.614	0.5009	0.0082982	3.228	0.4455	0.0235
																																				1.615	0.4913	0.0215	1.615	0.5	0.0073586	3.23	0.4479	0.0257
																																				1.616	0.4924	0.0218	1.616	0.5006	0.0074422	3.232	0.4512	0.0226
																																				1.617	0.4932	0.022	1.617	0.5028	0.0079601	3.234	0.4493	0.0212
																																				1.618	0.492	0.0217	1.618	0.5007	0.0069988	3.236	0.4532	0.0219
																																				1.619	0.492	0.0216	1.619	0.5004	0.0069229	3.238	0.4436	0.02
																																				1.62	0.4918	0.0213	1.62	0.4991	0.0075819	3.24	0.4543	0.0245
																																				1.621	0.4924	0.0219	1.621	0.5007	0.0072507	3.242	0.4523	0.0236
																																				1.622	0.4925	0.0219	1.622	0.5014	0.0074728	3.244	0.4491	0.02
																																				1.623	0.4922	0.0218	1.623	0.5012	0.0075643	3.246	0.4557	0.0207
																																				1.624	0.4922	0.022	1.624	0.501	0.0075091	3.248	0.448	0.0199
																																				1.625	0.4909	0.0213	1.625	0.5013	0.0073611	3.25	0.449	0.0218
																																				1.626	0.4921	0.0215	1.626	0.4984	0.0075446	3.252	0.4373	0.0189
																																				1.627	0.4912	0.0215	1.627	0.497	0.006776	3.254	0.4399	0.0214
																																				1.628	0.4924	0.0222	1.628	0.5017	0.0069905	3.256	0.4447	0.0228
																																				1.629	0.4923	0.022	1.629	0.5035	0.0078902	3.258	0.4441	0.0223
																																				1.63	0.4925	0.0215	1.63	0.5015	0.0076464	3.26	0.4513	0.0237
																																				1.631	0.4923	0.0218	1.631	0.4987	0.0074272	3.262	0.4547	0.0244
																																				1.632	0.4914	0.0216	1.632	0.4993	0.007472	3.264	0.4454	0.0235
																																				1.633	0.4929	0.0222	1.633	0.4992	0.0072623	3.266	0.4463	0.0237
																																				1.634	0.4923	0.0217	1.634	0.5002	0.0075806	3.268	0.4429	0.0213
																																				1.635	0.4919	0.0218	1.635	0.5028	0.0078018	3.27	0.45	0.0216
																																				1.636	0.4927	0.0213	1.636	0.5002	0.007652	3.272	0.4448	0.022
																																				1.637	0.4918	0.0217	1.637	0.4967	0.0066148	3.274	0.4424	0.0247
																																				1.638	0.4921	0.0217	1.638	0.4992	0.0077349	3.276	0.4407	0.0258
																																				1.639	0.4916	0.0217	1.639	0.4976	0.0077973	3.278	0.4504	0.0288
																																				1.64	0.4922	0.022	1.64	0.499	0.0075157	3.28	0.4505	0.0262
																																				1.641	0.4921	0.0216	1.641	0.5007	0.007606	3.282	0.4446	0.0232
																																				1.642	0.4923	0.0215	1.642	0.5	0.0072868	3.284	0.443	0.0225
																																				1.643	0.4915	0.0213	1.643	0.499	0.007235	3.286	0.4491	0.0219
																																				1.644	0.4915	0.0217	1.644	0.4977	0.0069109	3.288	0.4559	0.0217
																																				1.645	0.4916	0.0221	1.645	0.4985	0.0080343	3.29	0.4548	0.0222
																																				1.646	0.4923	0.0219	1.646	0.4998	0.0074065	3.292	0.4438	0.0215
																																				1.647	0.4929	0.022	1.647	0.4993	0.0073409	3.294	0.4562	0.0267
																																				1.648	0.4919	0.0215	1.648	0.4963	0.0066118	3.296	0.4353	0.0219
																																				1.649	0.4913	0.0216	1.649	0.4976	0.0066217	3.298	0.447	0.0244
																																				1.65	0.492	0.022	1.65	0.4985	0.0079566	3.3	0.4592	0.024
																																				1.651	0.4918	0.0218	1.651	0.5005	0.007148	3.302	0.455	0.0206
																																				1.652	0.4926	0.0217	1.652	0.499	0.0074456	3.304	0.4435	0.0214
																																				1.653	0.4926	0.0216	1.653	0.4981	0.007314	3.306	0.4404	0.0224
																																				1.654	0.4921	0.0215	1.654	0.4995	0.0072325	3.308	0.4504	0.0246
																																				1.655	0.492	0.0218	1.655	0.4976	0.0073292	3.31	0.4556	0.024
																																				1.656	0.4923	0.0219	1.656	0.502	0.0073465	3.312	0.4418	0.02
																																				1.657	0.4921	0.0219	1.657	0.4988	0.0079426	3.314	0.4425	0.0226
																																				1.658	0.4912	0.0215	1.658	0.4977	0.0073955	3.316	0.4494	0.0222
																																				1.659	0.4923	0.0215	1.659	0.4979	0.0070679	3.318	0.4537	0.0226
																																				1.66	0.4918	0.0217	1.66	0.4987	0.0074116	3.32	0.4476	0.0218
																																				1.661	0.492	0.0219	1.661	0.4968	0.0073001	3.322	0.4423	0.0218
																																				1.662	0.4922	0.0218	1.662	0.4996	0.0075757	3.324	0.4563	0.0263
																																				1.663	0.4926	0.0218	1.663	0.4981	0.0074294	3.326	0.4465	0.0234
																																				1.664	0.4922	0.0216	1.664	0.4974	0.0077822	3.328	0.4533	0.0241
																																				1.665	0.4924	0.0217	1.665	0.4951	0.0067324	3.33	0.4591	0.0253
																																				1.666	0.4922	0.0219	1.666	0.4982	0.0073053	3.332	0.4574	0.0221
																																				1.667	0.4917	0.0218	1.667	0.4944	0.0069559	3.334	0.4569	0.0183
																																				1.668	0.4916	0.0219	1.668	0.4973	0.007366	3.336	0.4579	0.0222
																																				1.669	0.4922	0.0219	1.669	0.4985	0.0076683	3.338	0.4476	0.0223
																																				1.67	0.4924	0.0215	1.67	0.4972	0.0072181	3.34	0.448	0.0233
																																				1.671	0.4923	0.0216	1.671	0.495	0.0074193	3.342	0.4472	0.0246
																																				1.672	0.4912	0.0217	1.672	0.4977	0.0069513	3.344	0.4535	0.0233
																																				1.673	0.4925	0.0218	1.673	0.4984	0.007838	3.346	0.4522	0.0232
																																				1.674	0.4922	0.0219	1.674	0.4959	0.0077892	3.348	0.4632	0.0231
																																				1.675	0.4921	0.0214	1.675	0.4962	0.0068824	3.35	0.4522	0.0214
																																				1.676	0.4917	0.0217	1.676	0.4957	0.0065253	3.352	0.4351	0.0199
																																				1.677	0.492	0.0217	1.677	0.4947	0.0069574	3.354	0.4283	0.021
																																				1.678	0.4915	0.0218	1.678	0.4981	0.0073452	3.356	0.428	0.0223
																																				1.679	0.4918	0.0222	1.679	0.4976	0.0074118	3.358	0.4408	0.0226
																																				1.68	0.4922	0.0218	1.68	0.4959	0.0074858	3.36	0.446	0.0193
																																				1.681	0.4921	0.0215	1.681	0.4957	0.0073247	3.362	0.4477	0.0204
																																				1.682	0.4913	0.0213	1.682	0.4982	0.0070717	3.364	0.446	0.0218
																																				1.683	0.4921	0.022	1.683	0.496	0.0070961	3.366	0.4499	0.0206
																																				1.684	0.4916	0.0218	1.684	0.4977	0.0073387	3.368	0.4566	0.024
																																				1.685	0.4915	0.0217	1.685	0.4978	0.0074724	3.37	0.4403	0.0201
																																				1.686	0.492	0.0216	1.686	0.4966	0.0074281	3.372	0.4383	0.0226
																																				1.687	0.4925	0.0216	1.687	0.4941	0.0069811	3.374	0.4409	0.023
																																				1.688	0.4922	0.0221	1.688	0.4947	0.0072629	3.376	0.4501	0.025
																																				1.689	0.4919	0.0215	1.689	0.4948	0.0073193	3.378	0.4476	0.0231
																																				1.69	0.4921	0.0218	1.69	0.4965	0.007599	3.38	0.448	0.026
																																				1.691	0.4922	0.0217	1.691	0.4956	0.0075081	3.382	0.4405	0.0221
																																				1.692	0.4908	0.0216	1.692	0.4961	0.0071513	3.384	0.4389	0.0217
																																				1.693	0.4925	0.0218	1.693	0.4951	0.0066054	3.386	0.4477	0.0229
																																				1.694	0.4923	0.0219	1.694	0.4955	0.0069875	3.388	0.4438	0.0214
																																				1.695	0.4923	0.0219	1.695	0.4968	0.0074663	3.39	0.4517	0.023
																																				1.696	0.492	0.0216	1.696	0.4966	0.0086406	3.392	0.4396	0.0216
																																				1.697	0.4914	0.0218	1.697	0.4971	0.0067719	3.394	0.4492	0.0216
																																				1.698	0.4913	0.0216	1.698	0.4945	0.0071282	3.396	0.4539	0.0221
																																				1.699	0.4916	0.0215	1.699	0.4953	0.0067164	3.398	0.4499	0.0191
																																				1.7	0.4924	0.0223	1.7	0.4973	0.0069105	3.4	0.4427	0.0189
																																				1.701	0.4917	0.0216	1.701	0.4968	0.0069978	3.402	0.4394	0.0211
																																				1.702	0.4925	0.022	1.702	0.4966	0.0068715	3.404	0.4504	0.0261
																																				1.703	0.4923	0.0214	1.703	0.4945	0.0065914	3.406	0.4418	0.0229
																																				1.704	0.4923	0.0218	1.704	0.4947	0.0071638	3.408	0.4393	0.0219
																																				1.705	0.4922	0.0219	1.705	0.4939	0.0064934	3.41	0.4554	0.0238
																																				1.706	0.492	0.0219	1.706	0.4973	0.0078552	3.412	0.4532	0.0212
																																				1.707	0.4921	0.0221	1.707	0.4936	0.0076151	3.414	0.4499	0.0227
																																				1.708	0.4913	0.0214	1.708	0.494	0.0065734	3.416	0.4477	0.022
																																				1.709	0.4918	0.0217	1.709	0.4935	0.0063699	3.418	0.4472	0.025
																																				1.71	0.4921	0.0215	1.71	0.494	0.0061654	3.42	0.4457	0.0249
																																				1.711	0.492	0.0221	1.711	0.4944	0.0062857	3.422	0.4455	0.0224
																																				1.712	0.4919	0.0222	1.712	0.4958	0.0073922	3.424	0.45	0.0225
																																				1.713	0.4918	0.0217	1.713	0.4976	0.0075974	3.426	0.4549	0.0229
																																				1.714	0.4915	0.0216	1.714	0.4946	0.0067506	3.428	0.4442	0.0216
																																				1.715	0.4916	0.0218	1.715	0.4922	0.0065838	3.43	0.4553	0.0247
																																				1.716	0.4917	0.0218	1.716	0.4949	0.0080676	3.432	0.4487	0.0244
																																				1.717	0.4922	0.022	1.717	0.4938	0.0068414	3.434	0.4479	0.0225
																																				1.718	0.492	0.0217	1.718	0.496	0.0067167	3.436	0.4427	0.0203
																																				1.719	0.4917	0.0217	1.719	0.4963	0.0074354	3.438	0.4453	0.0198
																																				1.72	0.4913	0.0213	1.72	0.4921	0.0066735	3.44	0.4426	0.0202
																																				1.721	0.4917	0.0217	1.721	0.4928	0.0064542	3.442	0.4492	0.0226
																																				1.722	0.4917	0.0218	1.722	0.4945	0.0067128	3.444	0.4452	0.023
																																				1.723	0.4918	0.0217	1.723	0.4958	0.0071578	3.446	0.4447	0.0251
																																				1.724	0.4919	0.0219	1.724	0.4958	0.0077115	3.448	0.4436	0.0237
																																				1.725	0.4916	0.0215	1.725	0.4952	0.0071213	3.45	0.4416	0.0214
																																				1.726	0.492	0.0216	1.726	0.4922	0.0069252	3.452	0.4514	0.0229
																																				1.727	0.4914	0.0219	1.727	0.493	0.0072693	3.454	0.448	0.0221
																																				1.728	0.4919	0.022	1.728	0.4945	0.006904	3.456	0.4413	0.0227
																																				1.729	0.4922	0.0221	1.729	0.4958	0.0075547	3.458	0.4432	0.0214
																																				1.73	0.4925	0.022	1.73	0.4947	0.0074111	3.46	0.4434	0.0213
																																				1.731	0.4922	0.0216	1.731	0.4922	0.0069501	3.462	0.4486	0.0229
																																				1.732	0.492	0.0217	1.732	0.4925	0.0060354	3.464	0.4453	0.0205
																																				1.733	0.4925	0.0221	1.733	0.4936	0.0072249	3.466	0.4537	0.0217
																																				1.734	0.4915	0.0219	1.734	0.4928	0.0070074	3.468	0.4544	0.0204
																																				1.735	0.4915	0.0216	1.735	0.4948	0.0070535	3.47	0.4585	0.0209
																																				1.736	0.4926	0.0219	1.736	0.4938	0.0073466	3.472	0.4545	0.0212
																																				1.737	0.4914	0.0217	1.737	0.4914	0.0069162	3.474	0.4499	0.0216
																																				1.738	0.4916	0.0217	1.738	0.4928	0.0069328	3.476	0.4471	0.0214
																																				1.739	0.4918	0.0215	1.739	0.4929	0.0063786	3.478	0.448	0.0256
																																				1.74	0.4928	0.0221	1.74	0.4955	0.0078278	3.48	0.4533	0.0295
																																				1.741	0.4918	0.022	1.741	0.4938	0.0077266	3.482	0.4374	0.0243
																																				1.742	0.4906	0.0216	1.742	0.4921	0.0070303	3.484	0.444	0.0229
																																				1.743	0.492	0.0217	1.743	0.4925	0.0067174	3.486	0.4417	0.0226
																																				1.744	0.491	0.0217	1.744	0.4938	0.0066582	3.488	0.4514	0.0235
																																				1.745	0.4917	0.0219	1.745	0.4951	0.0066868	3.49	0.4452	0.0202
																																				1.746	0.4922	0.0219	1.746	0.4948	0.0072497	3.492	0.4517	0.0239
																																				1.747	0.4921	0.022	1.747	0.4931	0.0072233	3.494	0.4427	0.0197
																																				1.748	0.4921	0.0219	1.748	0.4911	0.0068989	3.496	0.4491	0.0222
																																				1.749	0.4921	0.0217	1.749	0.4907	0.0066349	3.498	0.4497	0.0215
																																				1.75	0.4913	0.0219	1.75	0.4926	0.0068501	3.5	0.4512	0.0247
																																				1.751	0.4912	0.0218	1.751	0.493	0.00704	3.502	0.4444	0.0244
																																				1.752	0.4926	0.0217	1.752	0.494	0.0068961	3.504	0.4494	0.0252
																																				1.753	0.4922	0.0216	1.753	0.4914	0.0068105	3.506	0.4479	0.021
																																				1.754	0.4916	0.0214	1.754	0.4929	0.0069356	3.508	0.4515	0.0225
																																				1.755	0.4917	0.022	1.755	0.4924	0.0066897	3.51	0.4532	0.0232
																																				1.756	0.4917	0.022	1.756	0.4922	0.0068662	3.512	0.4429	0.0214
																																				1.757	0.4919	0.0221	1.757	0.4928	0.0075462	3.514	0.4515	0.0242
																																				1.758	0.4909	0.0217	1.758	0.493	0.0071304	3.516	0.4556	0.0241
																																				1.759	0.4913	0.0216	1.759	0.4906	0.006279	3.518	0.451	0.0224
																																				1.76	0.4914	0.0216	1.76	0.493	0.0065586	3.52	0.4612	0.0233
																																				1.761	0.4914	0.0218	1.761	0.4917	0.0063786	3.522	0.4483	0.0209
																																				1.762	0.4915	0.0217	1.762	0.4939	0.0065648	3.524	0.4526	0.0219
																																				1.763	0.4917	0.0219	1.763	0.495	0.0076166	3.526	0.4397	0.019
																																				1.764	0.4917	0.022	1.764	0.4909	0.0072093	3.528	0.4463	0.0215
																																				1.765	0.4913	0.0217	1.765	0.4905	0.0072068	3.53	0.4576	0.0256
																																				1.766	0.4919	0.0217	1.766	0.4903	0.0074644	3.532	0.4445	0.0237
																																				1.767	0.4926	0.0219	1.767	0.4915	0.0070322	3.534	0.4455	0.0236
																																				1.768	0.4918	0.0217	1.768	0.491	0.0063258	3.536	0.4474	0.0246
																																				1.769	0.4913	0.0215	1.769	0.4917	0.0066067	3.538	0.444	0.0236
																																				1.77	0.4917	0.0214	1.77	0.488	0.0065165	3.54	0.4436	0.023
																																				1.771	0.4918	0.0216	1.771	0.4893	0.0066533	3.542	0.4454	0.0246
																																				1.772	0.4916	0.022	1.772	0.4918	0.0075239	3.544	0.4488	0.0251
																																				1.773	0.492	0.0222	1.773	0.4941	0.0071856	3.546	0.4421	0.0206
																																				1.774	0.4911	0.0215	1.774	0.4923	0.0076345	3.548	0.4565	0.021
																																				1.775	0.4912	0.0216	1.775	0.4896	0.0068666	3.55	0.4566	0.0215
																																				1.776	0.4915	0.0219	1.776	0.4899	0.0066275	3.552	0.4472	0.0209
																																				1.777	0.4915	0.0218	1.777	0.4924	0.0071384	3.554	0.4475	0.0225
																																				1.778	0.4911	0.022	1.778	0.4909	0.0061845	3.556	0.4454	0.022
																																				1.779	0.4917	0.0217	1.779	0.4939	0.0073951	3.558	0.4475	0.0228
																																				1.78	0.4921	0.0216	1.78	0.4907	0.0073695	3.56	0.4409	0.0233
																																				1.781	0.4917	0.0215	1.781	0.4905	0.0068729	3.562	0.4382	0.0242
																																				1.782	0.4918	0.0217	1.782	0.4888	0.0069487	3.564	0.4394	0.0255
																																				1.783	0.4912	0.0219	1.783	0.4901	0.0069582	3.566	0.4459	0.0255
																																				1.784	0.4905	0.0214	1.784	0.4921	0.0073494	3.568	0.4407	0.0238
																																				1.785	0.492	0.0218	1.785	0.492	0.0072732	3.57	0.4489	0.0243
																																				1.786	0.4925	0.022	1.786	0.49	0.0066135	3.572	0.4434	0.0227
																																				1.787	0.4909	0.0215	1.787	0.4893	0.0063134	3.574	0.4485	0.024
																																				1.788	0.491	0.0218	1.788	0.4903	0.0071411	3.576	0.4518	0.0244
																																				1.789	0.4913	0.0217	1.789	0.4902	0.0068368	3.578	0.4514	0.0256
																																				1.79	0.4915	0.022	1.79	0.4914	0.0068665	3.58	0.4435	0.024
																																				1.791	0.4921	0.0216	1.791	0.4918	0.0076333	3.582	0.4406	0.0239
																																				1.792	0.4917	0.0219	1.792	0.49	0.0061886	3.584	0.4427	0.0217
																																				1.793	0.4918	0.022	1.793	0.4897	0.006958	3.586	0.4467	0.0222
																																				1.794	0.491	0.0219	1.794	0.489	0.0063991	3.588	0.4604	0.0245
																																				1.795	0.4907	0.022	1.795	0.4907	0.006936	3.59	0.4523	0.0182
																																				1.796	0.4911	0.0219	1.796	0.493	0.0068672	3.592	0.455	0.0204
																																				1.797	0.4922	0.0218	1.797	0.4909	0.0068774	3.594	0.4469	0.0209
																																				1.798	0.4917	0.0216	1.798	0.4884	0.0068904	3.596	0.4509	0.0236
																																				1.799	0.4908	0.0215	1.799	0.4878	0.0064807	3.598	0.4457	0.0249
																																				1.8	0.4916	0.022	1.8	0.4889	0.0069248	3.6	0.4431	0.0254
																																				1.801	0.4915	0.0216	1.801	0.4896	0.0072199	3.602	0.4348	0.0223
																																				1.802	0.4927	0.0217	1.802	0.4894	0.0068669	3.604	0.4488	0.0248
																																				1.803	0.4917	0.0215	1.803	0.4883	0.0075304	3.606	0.4504	0.0231
																																				1.804	0.4907	0.0218	1.804	0.4871	0.0067651	3.608	0.4427	0.0195
																																				1.805	0.4912	0.0214	1.805	0.4895	0.0066643	3.61	0.4562	0.0229
																																				1.806	0.4915	0.022	1.806	0.4893	0.0074048	3.612	0.4463	0.02
																																				1.807	0.4915	0.0219	1.807	0.4893	0.0070893	3.614	0.4542	0.0229
																																				1.808	0.4908	0.0216	1.808	0.4893	0.0074583	3.616	0.4617	0.024
																																				1.809	0.4913	0.022	1.809	0.4902	0.0065738	3.618	0.4462	0.0222
																																				1.81	0.4917	0.0221	1.81	0.4881	0.006301	3.62	0.4474	0.0241
																																				1.811	0.4909	0.022	1.811	0.4893	0.0068136	3.622	0.4448	0.0236
																																				1.812	0.4918	0.022	1.812	0.4907	0.0075953	3.624	0.4497	0.0227
																																				1.813	0.4909	0.022	1.813	0.4911	0.0069235	3.626	0.4473	0.0229
																																				1.814	0.4917	0.0219	1.814	0.4887	0.0072426	3.628	0.4469	0.0236
																																				1.815	0.4912	0.0218	1.815	0.4869	0.0070828	3.63	0.4485	0.0249
																																				1.816	0.4911	0.022	1.816	0.4869	0.0064873	3.632	0.4443	0.0217
																																				1.817	0.4918	0.0223	1.817	0.4893	0.0065193	3.634	0.4581	0.0229
																																				1.818	0.4908	0.0217	1.818	0.4908	0.0071141	3.636	0.462	0.0216
																																				1.819	0.4915	0.022	1.819	0.4889	0.0065172	3.638	0.4522	0.0203
																																				1.82	0.4921	0.0216	1.82	0.4874	0.0075766	3.64	0.4527	0.0223
																																				1.821	0.4911	0.0217	1.821	0.4852	0.0065828	3.642	0.4488	0.0235
																																				1.822	0.4918	0.0218	1.822	0.4882	0.0066871	3.644	0.4419	0.0237
																																				1.823	0.4913	0.022	1.823	0.4887	0.0068566	3.646	0.4536	0.0244
																																				1.824	0.4914	0.0217	1.824	0.4884	0.0071929	3.648	0.4528	0.0216
																																				1.825	0.4907	0.0214	1.825	0.4866	0.0065497	3.65	0.4468	0.0205
																																				1.826	0.4912	0.0217	1.826	0.4864	0.0062799	3.652	0.4479	0.0232
																																				1.827	0.491	0.0217	1.827	0.488	0.00596	3.654	0.449	0.0235
																																				1.828	0.4906	0.0221	1.828	0.489	0.0064627	3.656	0.4496	0.0227
																																				1.829	0.4914	0.0218	1.829	0.4877	0.0068188	3.658	0.4475	0.0225
																																				1.83	0.492	0.0217	1.83	0.4887	0.0071235	3.66	0.4487	0.0229
																																				1.831	0.4916	0.0216	1.831	0.487	0.006616	3.662	0.447	0.0231
																																				1.832	0.4916	0.0215	1.832	0.4871	0.0068654	3.664	0.4573	0.0237
																																				1.833	0.4919	0.0223	1.833	0.4866	0.0066816	3.666	0.4526	0.0221
																																				1.834	0.4913	0.0217	1.834	0.4887	0.0066718	3.668	0.4469	0.0221
																																				1.835	0.4918	0.022	1.835	0.4893	0.006285	3.67	0.4453	0.0215
																																				1.836	0.4915	0.0217	1.836	0.486	0.0065181	3.672	0.4445	0.0234
																																				1.837	0.4916	0.0216	1.837	0.487	0.006343	3.674	0.4345	0.0214
																																				1.838	0.4913	0.0219	1.838	0.4869	0.0061491	3.676	0.4478	0.0238
																																				1.839	0.4912	0.0217	1.839	0.4876	0.0065785	3.678	0.4498	0.019
																																				1.84	0.4921	0.0221	1.84	0.4905	0.0076047	3.68	0.466	0.0241
																																				1.841	0.4906	0.0219	1.841	0.4877	0.0068044	3.682	0.4581	0.021
																																				1.842	0.4906	0.0216	1.842	0.487	0.0065747	3.684	0.4569	0.0217
																																				1.843	0.491	0.0222	1.843	0.4847	0.006287	3.686	0.454	0.0234
																																				1.844	0.4909	0.0219	1.844	0.4857	0.0066221	3.688	0.45	0.0221
																																				1.845	0.4914	0.022	1.845	0.4864	0.0062632	3.69	0.4429	0.0229
																																				1.846	0.4914	0.0218	1.846	0.488	0.0067533	3.692	0.4496	0.0243
																																				1.847	0.4918	0.0219	1.847	0.4859	0.0068798	3.694	0.4463	0.0224
																																				1.848	0.4916	0.022	1.848	0.4837	0.0059029	3.696	0.4524	0.0241
																																				1.849	0.4911	0.0219	1.849	0.4852	0.0061435	3.698	0.4461	0.0231
																																				1.85	0.4908	0.0221	1.85	0.4856	0.0067922	3.7	0.4353	0.0214
																																				1.851	0.4915	0.0219	1.851	0.488	0.0061647	3.702	0.4526	0.0247
																																				1.852	0.4911	0.0219	1.852	0.488	0.0063056	3.704	0.4463	0.0229
																																				1.853	0.4912	0.0215	1.853	0.4842	0.0065864	3.706	0.4529	0.0227
																																				1.854	0.4916	0.0218	1.854	0.487	0.0062257	3.708	0.4504	0.0228
																																				1.855	0.4911	0.0216	1.855	0.486	0.0065716	3.71	0.4397	0.0207
																																				1.856	0.4914	0.0217	1.856	0.4874	0.0065131	3.712	0.4479	0.023
																																				1.857	0.4919	0.022	1.857	0.4859	0.0070836	3.714	0.4453	0.023
																																				1.858	0.4914	0.0215	1.858	0.4846	0.0071218	3.716	0.449	0.0232
																																				1.859	0.4917	0.0218	1.859	0.4844	0.0065247	3.718	0.4397	0.0197
																																				1.86	0.4906	0.0218	1.86	0.4862	0.0061643	3.72	0.4536	0.0227
																																				1.861	0.4902	0.0217	1.861	0.486	0.0061565	3.722	0.4486	0.0241
																																				1.862	0.4919	0.0222	1.862	0.4877	0.0065637	3.724	0.4438	0.0247
																																				1.863	0.4922	0.0219	1.863	0.4863	0.0067729	3.726	0.4448	0.0233
																																				1.864	0.4918	0.0219	1.864	0.4842	0.0068353	3.728	0.4558	0.0254
																																				1.865	0.4908	0.0218	1.865	0.4859	0.0068672	3.73	0.454	0.0244
																																				1.866	0.4915	0.0221	1.866	0.4851	0.0066565	3.732	0.4451	0.0198
																																				1.867	0.4911	0.0219	1.867	0.4862	0.0066505	3.734	0.4544	0.021
																																				1.868	0.4908	0.0219	1.868	0.4865	0.0063414	3.736	0.4551	0.0237
																																				1.869	0.4909	0.0216	1.869	0.4865	0.0062478	3.738	0.4499	0.0216
																																				1.87	0.4917	0.0216	1.87	0.4835	0.006697	3.74	0.4491	0.0235
																																				1.871	0.4912	0.022	1.871	0.4835	0.0062122	3.742	0.4437	0.0236
																																				1.872	0.4909	0.022	1.872	0.4858	0.0059486	3.744	0.4441	0.0223
																																				1.873	0.4911	0.022	1.873	0.4859	0.0067729	3.746	0.4505	0.0232
																																				1.874	0.4922	0.022	1.874	0.4869	0.0072666	3.748	0.4445	0.0218
																																				1.875	0.4906	0.0214	1.875	0.4844	0.0060262	3.75	0.4473	0.0207
																																				1.876	0.4904	0.0216	1.876	0.4848	0.0061192	3.752	0.4451	0.0222
																																				1.877	0.4901	0.0215	1.877	0.4854	0.0062398	3.754	0.445	0.0224
																																				1.878	0.4908	0.0222	1.878	0.4848	0.0062203	3.756	0.4407	0.0212
																																				1.879	0.4917	0.0224	1.879	0.4876	0.007099	3.758	0.4422	0.0224
																																				1.88	0.4918	0.0218	1.88	0.4858	0.0064204	3.76	0.4452	0.0246
																																				1.881	0.4915	0.0219	1.881	0.4857	0.006734	3.762	0.4434	0.0203
																																				1.882	0.491	0.0218	1.882	0.4857	0.0066503	3.764	0.4621	0.0233
																																				1.883	0.492	0.0223	1.883	0.4836	0.0061788	3.766	0.4542	0.0215
																																				1.884	0.4909	0.022	1.884	0.4857	0.006419	3.768	0.4507	0.0237
																																				1.885	0.492	0.0221	1.885	0.4859	0.0066023	3.77	0.4449	0.0221
																																				1.886	0.4914	0.0218	1.886	0.483	0.0056937	3.772	0.4451	0.0206
																																				1.887	0.4913	0.0216	1.887	0.4835	0.0061321	3.774	0.4479	0.0218
																																				1.888	0.4913	0.0219	1.888	0.4835	0.00576	3.776	0.4432	0.0215
																																				1.889	0.4911	0.0222	1.889	0.4843	0.0067134	3.778	0.4443	0.0246
																																				1.89	0.4918	0.0221	1.89	0.4849	0.0064097	3.78	0.4428	0.0259
																																				1.891	0.4911	0.0216	1.891	0.4837	0.0065195	3.782	0.4472	0.0252
																																				1.892	0.4908	0.0217	1.892	0.4836	0.0060976	3.784	0.4462	0.0235
																																				1.893	0.491	0.0218	1.893	0.4833	0.0061264	3.786	0.448	0.0251
																																				1.894	0.4905	0.0219	1.894	0.482	0.0057713	3.788	0.4445	0.0235
																																				1.895	0.4906	0.0219	1.895	0.4863	0.0068006	3.79	0.4419	0.0224
																																				1.896	0.4917	0.0224	1.896	0.4876	0.0069775	3.792	0.4511	0.0246
																																				1.897	0.4919	0.0218	1.897	0.4834	0.0063839	3.794	0.442	0.0208
																																				1.898	0.4912	0.0217	1.898	0.4827	0.0058613	3.796	0.4539	0.0246
																																				1.899	0.4913	0.0222	1.899	0.483	0.00577	3.798	0.4467	0.0208
																																				1.9	0.4915	0.022	1.9	0.484	0.0060894	3.8	0.4588	0.023
																																				1.901	0.4908	0.0215	1.901	0.4855	0.0065754	3.802	0.4589	0.0243
																																				1.902	0.4917	0.0217	1.902	0.4855	0.0070366	3.804	0.4539	0.0215
																																				1.903	0.4923	0.0218	1.903	0.4833	0.0060973	3.806	0.4518	0.0225
																																				1.904	0.4915	0.0217	1.904	0.4816	0.0056345	3.808	0.4495	0.0242
																																				1.905	0.4914	0.0218	1.905	0.4823	0.0060199	3.81	0.4408	0.021
																																				1.906	0.4915	0.0222	1.906	0.4843	0.0065345	3.812	0.4593	0.0267
																																				1.907	0.4913	0.0221	1.907	0.4842	0.0064863	3.814	0.4574	0.0232
																																				1.908	0.4918	0.0216	1.908	0.4853	0.0067505	3.816	0.4571	0.0227
																																				1.909	0.4909	0.0214	1.909	0.4821	0.0057162	3.818	0.4414	0.0212
																																				1.91	0.4908	0.0218	1.91	0.4817	0.0052565	3.82	0.4526	0.023
																																				1.911	0.491	0.022	1.911	0.4849	0.0065087	3.822	0.4492	0.0206
																																				1.912	0.4919	0.0222	1.912	0.4858	0.006702	3.824	0.4539	0.0226
																																				1.913	0.4922	0.0222	1.913	0.4846	0.006972	3.826	0.4535	0.0224
																																				1.914	0.4914	0.0217	1.914	0.4825	0.0056315	3.828	0.457	0.0233
																																				1.915	0.4916	0.0218	1.915	0.4815	0.0061562	3.83	0.4531	0.0243
																																				1.916	0.4915	0.0221	1.916	0.4812	0.0062249	3.832	0.4522	0.0253
																																				1.917	0.4911	0.0221	1.917	0.484	0.0061913	3.834	0.4434	0.024
																																				1.918	0.4913	0.0216	1.918	0.485	0.0061464	3.836	0.4512	0.027
																																				1.919	0.4922	0.0215	1.919	0.4833	0.0061044	3.838	0.4459	0.0216
																																				1.92	0.4909	0.0216	1.92	0.4822	0.0066329	3.84	0.458	0.0229
																																				1.921	0.4915	0.0218	1.921	0.4817	0.0059648	3.842	0.456	0.0203
																																				1.922	0.4915	0.0218	1.922	0.483	0.0065843	3.844	0.4541	0.0217
																																				1.923	0.4913	0.0222	1.923	0.4837	0.0068387	3.846	0.447	0.0211
																																				1.924	0.4914	0.0219	1.924	0.4825	0.0066316	3.848	0.441	0.0238
																																				1.925	0.4909	0.0215	1.925	0.4832	0.0065854	3.85	0.4328	0.023
																																				1.926	0.4905	0.0219	1.926	0.4818	0.0061639	3.852	0.4525	0.0271
																																				1.927	0.4906	0.022	1.927	0.4832	0.0059601	3.854	0.4538	0.0243
																																				1.928	0.491	0.0221	1.928	0.484	0.0061717	3.856	0.4568	0.0241
																																				1.929	0.4916	0.0219	1.929	0.4839	0.0067471	3.858	0.4505	0.0241
																																				1.93	0.4913	0.0219	1.93	0.4816	0.0068319	3.86	0.4502	0.0255
																																				1.931	0.4919	0.0218	1.931	0.482	0.0063827	3.862	0.4363	0.0232
																																				1.932	0.4907	0.0219	1.932	0.4819	0.0063097	3.864	0.4422	0.0241
																																				1.933	0.4912	0.0222	1.933	0.4816	0.006151	3.866	0.449	0.0219
																																				1.934	0.4916	0.0222	1.934	0.4833	0.0059681	3.868	0.4519	0.022
																																				1.935	0.4914	0.0221	1.935	0.4842	0.0067453	3.87	0.4554	0.0223
																																				1.936	0.4918	0.0221	1.936	0.4813	0.006294	3.872	0.4552	0.0239
																																				1.937	0.4904	0.0214	1.937	0.4821	0.0058789	3.874	0.4546	0.0222
																																				1.938	0.4909	0.0218	1.938	0.481	0.0063614	3.876	0.4506	0.0205
																																				1.939	0.4914	0.022	1.939	0.4823	0.0067171	3.878	0.4477	0.022
																																				1.94	0.4913	0.0222	1.94	0.4838	0.0069261	3.88	0.4553	0.0257
																																				1.941	0.4908	0.0218	1.941	0.4833	0.0063466	3.882	0.462	0.0274
																																				1.942	0.491	0.0214	1.942	0.4808	0.0064797	3.884	0.4609	0.0224
																																				1.943	0.4904	0.0218	1.943	0.4814	0.0063156	3.886	0.4594	0.0252
																																				1.944	0.4902	0.0221	1.944	0.4819	0.0060951	3.888	0.4511	0.0258
																																				1.945	0.4913	0.0222	1.945	0.4833	0.0063444	3.89	0.441	0.0218
																																				1.946	0.4913	0.022	1.946	0.4845	0.0074888	3.892	0.4511	0.0217
																																				1.947	0.4921	0.0221	1.947	0.4813	0.0062027	3.894	0.4422	0.0191
																																				1.948	0.4912	0.0218	1.948	0.4824	0.0062014	3.896	0.4437	0.0224
																																				1.949	0.4916	0.0217	1.949	0.4798	0.006384	3.898	0.4505	0.0246
																																				1.95	0.4912	0.0222	1.95	0.4818	0.0059845	3.9	0.4407	0.0232
																																				1.951	0.4905	0.0218	1.951	0.4827	0.0063757	3.902	0.442	0.0251
																																				1.952	0.4918	0.0218	1.952	0.4824	0.0062786	3.904	0.4346	0.0243
																																				1.953	0.4918	0.0216	1.953	0.4819	0.0058402	3.906	0.4386	0.0236
																																				1.954	0.4913	0.0216	1.954	0.4805	0.0060686	3.908	0.4385	0.0238
																																				1.955	0.4915	0.022	1.955	0.4803	0.0061745	3.91	0.4388	0.0232
																																				1.956	0.4922	0.0218	1.956	0.4812	0.0061526	3.912	0.4418	0.0222
																																				1.957	0.4914	0.0218	1.957	0.4811	0.0065119	3.914	0.4574	0.0248
																																				1.958	0.4906	0.0213	1.958	0.4808	0.0065581	3.916	0.4568	0.0247
																																				1.959	0.4913	0.0219	1.959	0.4805	0.0063571	3.918	0.4553	0.0236
																																				1.96	0.4905	0.0217	1.96	0.4809	0.0063678	3.92	0.4488	0.0228
																																				1.961	0.491	0.0219	1.961	0.4812	0.0063512	3.922	0.4468	0.0229
																																				1.962	0.4921	0.0224	1.962	0.4839	0.0065485	3.924	0.4472	0.0234
																																				1.963	0.4908	0.0218	1.963	0.4811	0.0062202	3.926	0.4454	0.0224
																																				1.964	0.4912	0.0221	1.964	0.4804	0.0060696	3.928	0.4476	0.0234
																																				1.965	0.4911	0.0219	1.965	0.4804	0.0060581	3.93	0.455	0.0246
																																				1.966	0.491	0.022	1.966	0.4796	0.0056465	3.932	0.4454	0.0229
																																				1.967	0.4899	0.0218	1.967	0.4808	0.0058568	3.934	0.4429	0.0225
																																				1.968	0.4907	0.0217	1.968	0.4811	0.0066213	3.936	0.4478	0.0269
																																				1.969	0.4919	0.0219	1.969	0.4812	0.0060498	3.938	0.4384	0.0243
																																				1.97	0.4912	0.0218	1.97	0.4801	0.0062759	3.94	0.4467	0.023
																																				1.971	0.4908	0.0221	1.971	0.4784	0.0057675	3.942	0.453	0.0223
																																				1.972	0.4913	0.022	1.972	0.4801	0.0064325	3.944	0.4484	0.0208
																																				1.973	0.4918	0.0223	1.973	0.482	0.0067129	3.946	0.4546	0.0248
																																				1.974	0.4918	0.022	1.974	0.4815	0.0062809	3.948	0.4449	0.0222
																																				1.975	0.4906	0.0216	1.975	0.4805	0.0060829	3.95	0.4386	0.0214
																																				1.976	0.4906	0.0217	1.976	0.478	0.006005	3.952	0.4504	0.0229
																																				1.977	0.4903	0.022	1.977	0.4792	0.0056737	3.954	0.4576	0.0225
																																				1.978	0.4916	0.022	1.978	0.4804	0.0061787	3.956	0.4464	0.0203
																																				1.979	0.4921	0.0221	1.979	0.4797	0.0060615	3.958	0.4537	0.0212
																																				1.98	0.491	0.0219	1.98	0.481	0.0058144	3.96	0.4579	0.023
																																				1.981	0.4919	0.0219	1.981	0.4777	0.0060745	3.962	0.4499	0.022
																																				1.982	0.4904	0.0219	1.982	0.4793	0.0063707	3.964	0.4494	0.0233
																																				1.983	0.4913	0.0222	1.983	0.4797	0.0060119	3.966	0.4501	0.0235
																																				1.984	0.4913	0.0219	1.984	0.4811	0.005742	3.968	0.4527	0.023
																																				1.985	0.4907	0.0219	1.985	0.481	0.0062567	3.97	0.4525	0.0216
																																				1.986	0.4914	0.0219	1.986	0.4799	0.0059212	3.972	0.4515	0.0209
																																				1.987	0.4908	0.0215	1.987	0.4781	0.0054794	3.974	0.4529	0.0226
																																				1.988	0.491	0.0219	1.988	0.4774	0.0060051	3.976	0.4531	0.0223
																																				1.989	0.4913	0.0221	1.989	0.4792	0.0059869	3.978	0.4532	0.0212
																																				1.99	0.492	0.0221	1.99	0.4801	0.0063066	3.98	0.439	0.022
																																				1.991	0.4911	0.0216	1.991	0.4796	0.0062242	3.982	0.4442	0.0233
																																				1.992	0.4908	0.0217	1.992	0.4781	0.0059947	3.984	0.4483	0.0246
																																				1.993	0.49	0.0218	1.993	0.4788	0.0053218	3.986	0.4486	0.0252
																																				1.994	0.4912	0.022	1.994	0.4785	0.0058998	3.988	0.4461	0.0228
																																				1.995	0.4912	0.022	1.995	0.4801	0.0060423	3.99	0.4515	0.0241
																																				1.996	0.4909	0.0218	1.996	0.4794	0.0062551	3.992	0.4458	0.024
																																				1.997	0.4913	0.0222	1.997	0.4786	0.0061066	3.994	0.449	0.0244
[truncated: 1,002 more rows]
