# Supplementary figures and images for: Structure and physiological function of the human KCNQ1 channel voltage sensor intermediate state
Source: eLife journal article supplement (doi:10.7554/elife.53901), 2020-02-25

**A**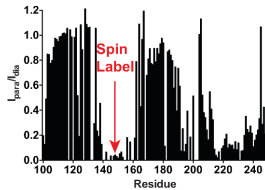**B**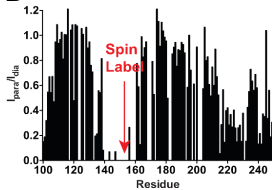**C**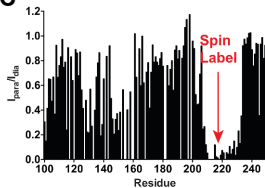**D**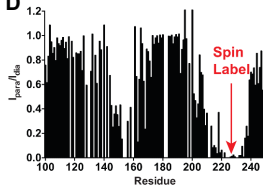**E**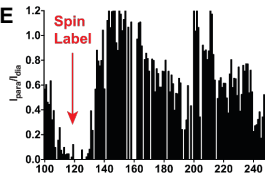**F**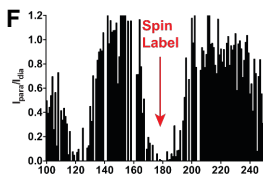**G**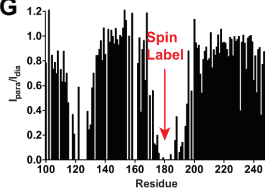**H**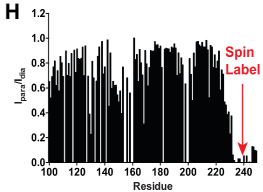

Supplement: supp [file elife_poa_e53901_Figure_1_figure_supplement_1.pdf › elife_poa_e53901_Figure_1_figure_supplement_1.pdf]

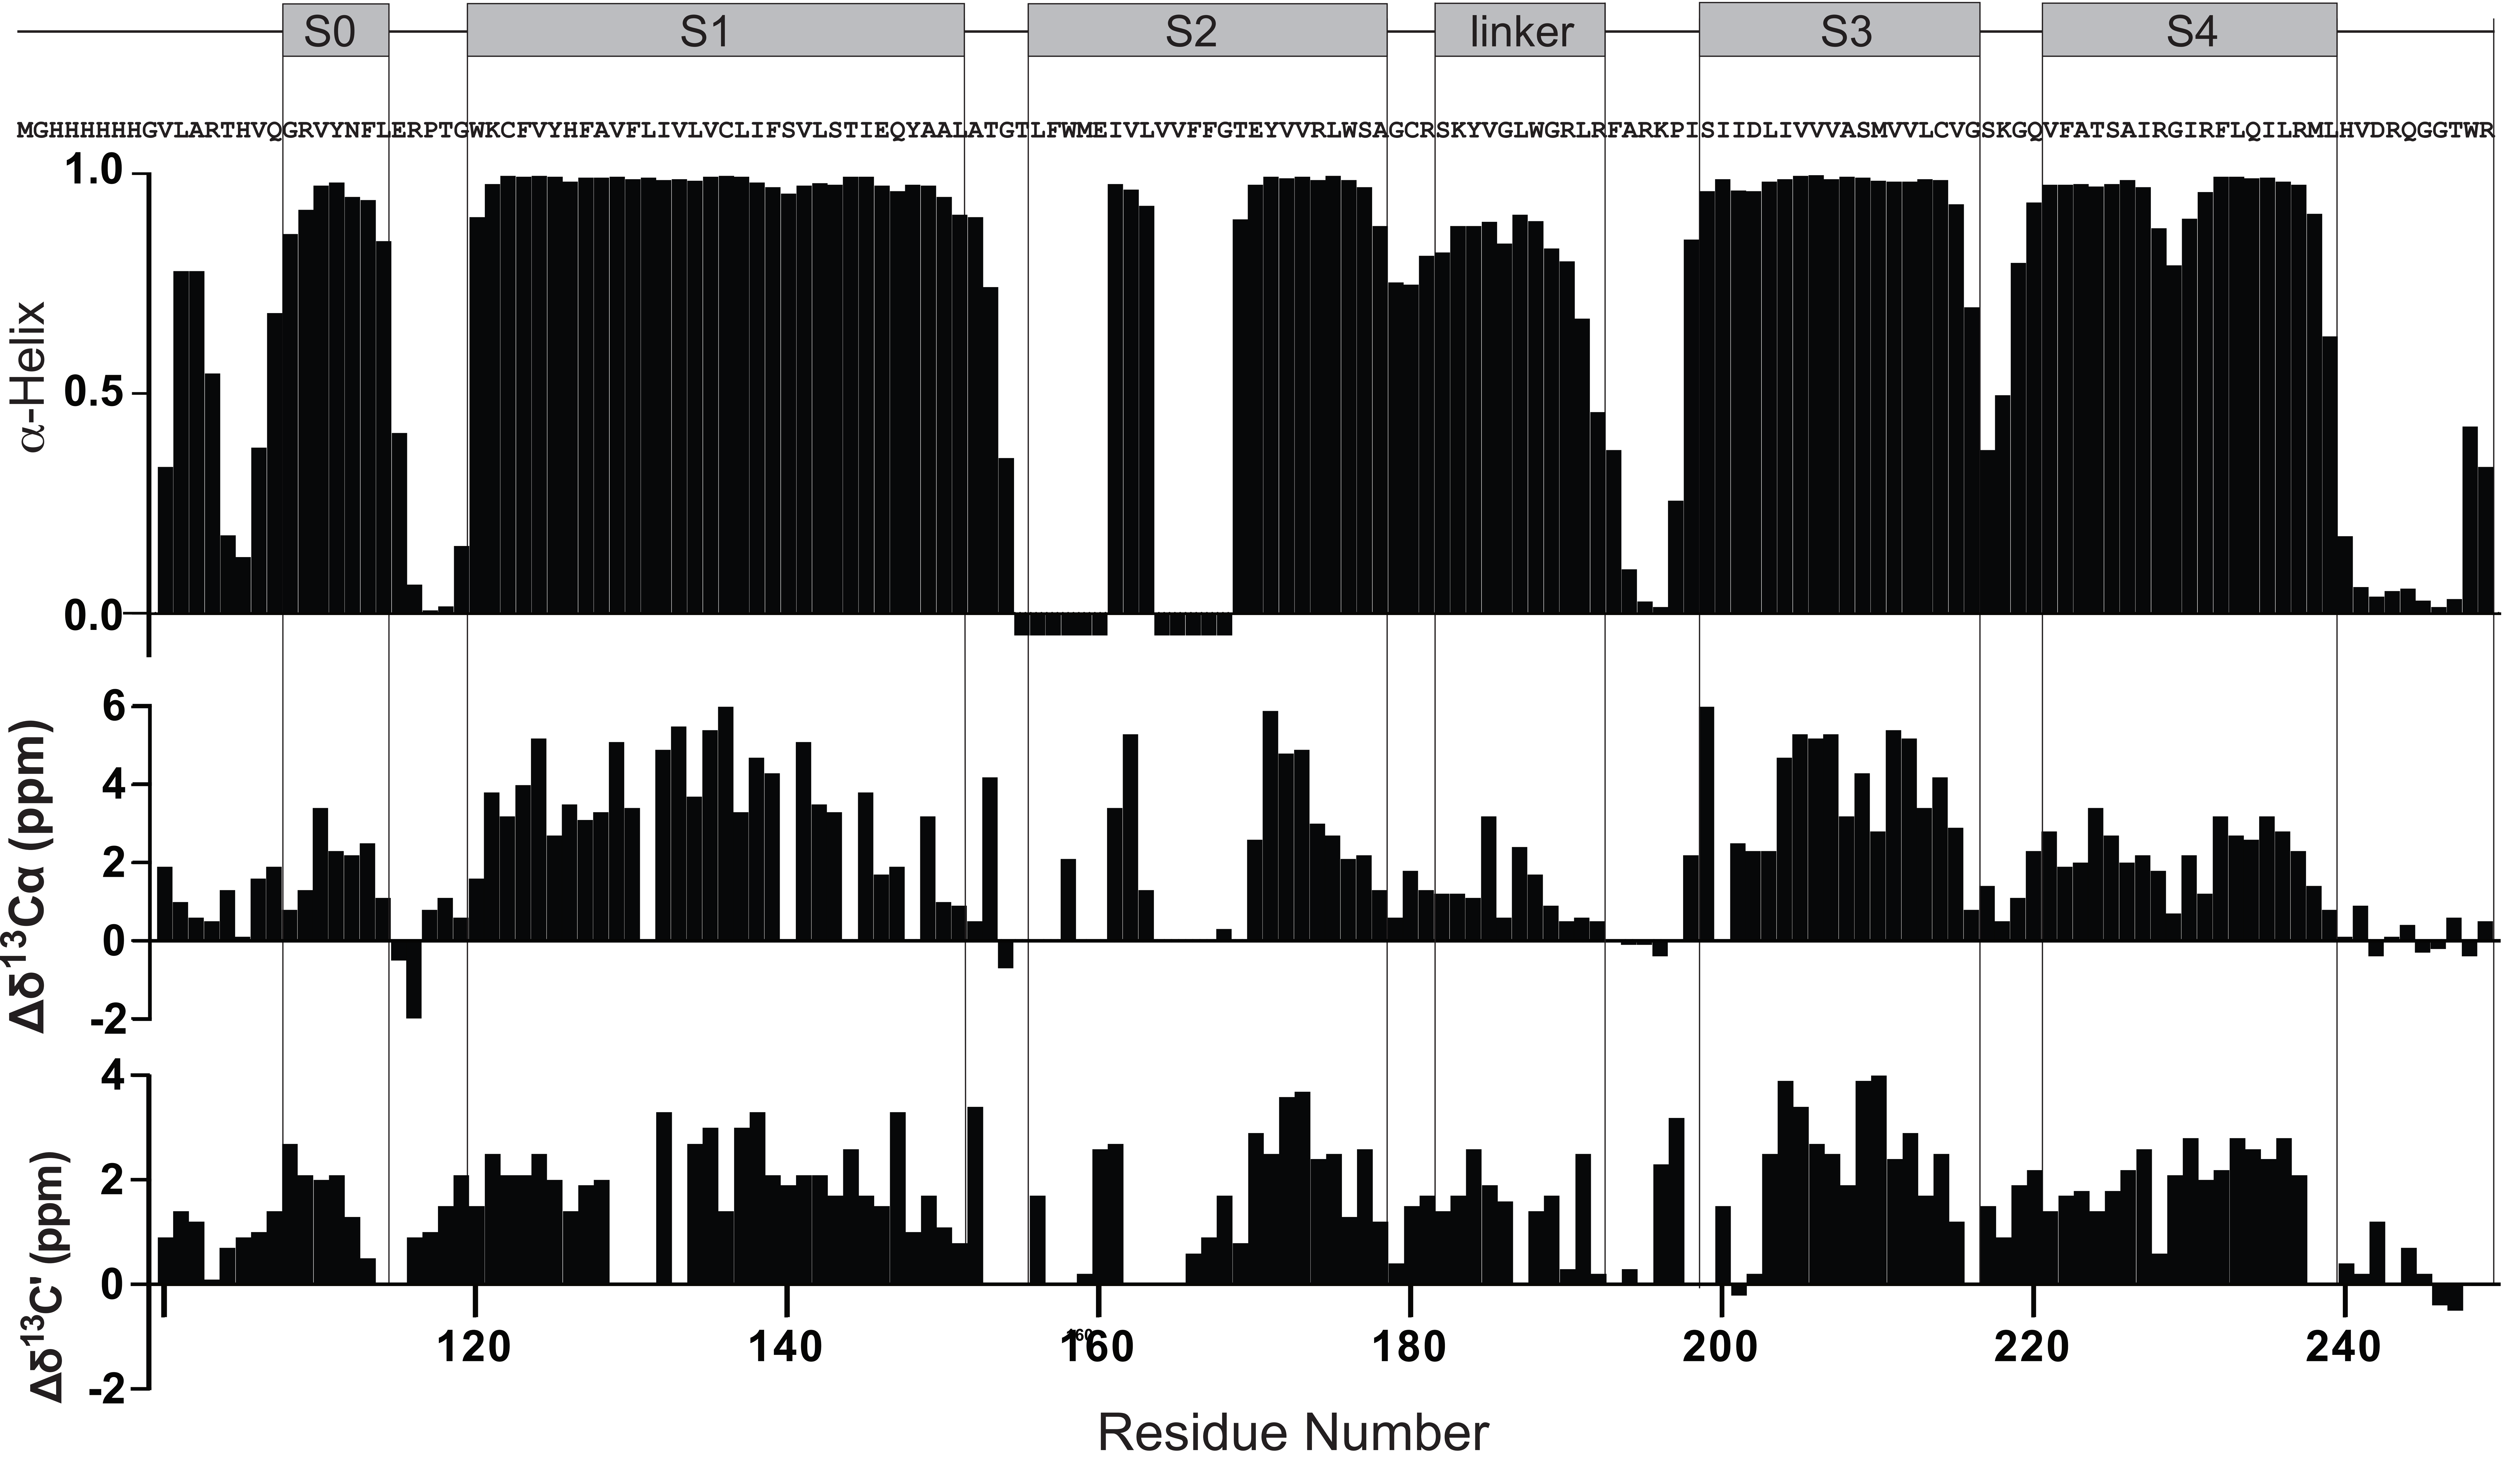

Supplement: supp [file elife_poa_e53901_Figure_1_figure_supplement_2.pdf › elife_poa_e53901_Figure_1_figure_supplement_2.pdf]

# Ala 178 H $\beta$

$^{13}\text{C}$ : 18.7

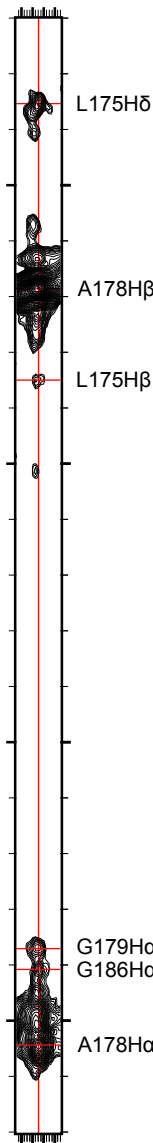

# Ile 201 Hy2

$^{13}\text{C}$ : 17.2 PPM

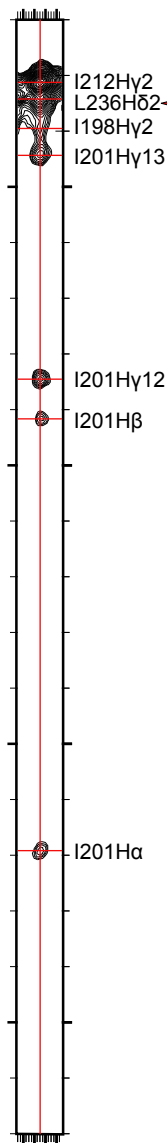

# Val 212 Hy1

$^{13}\text{C}$ : 23.0 PPM

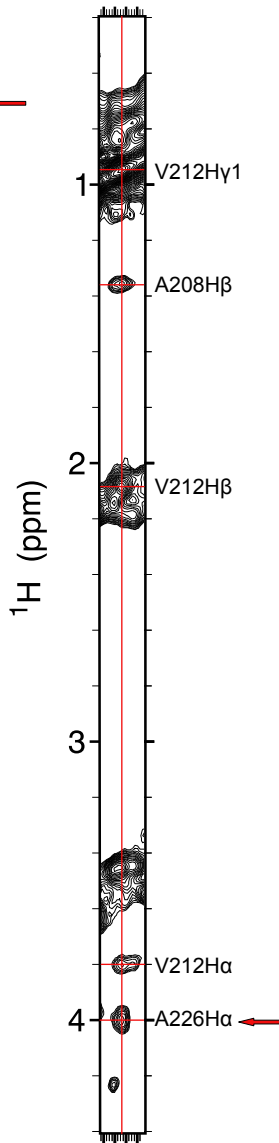

Supplement: supp [file elife_poa_e53901_Figure_1_figure_supplement_3.pdf › elife_poa_e53901_Figure_1_figure_supplement_3.pdf]

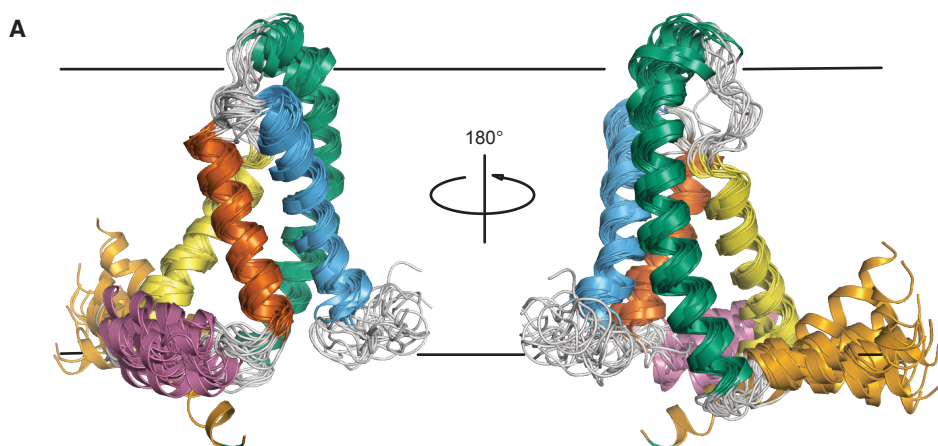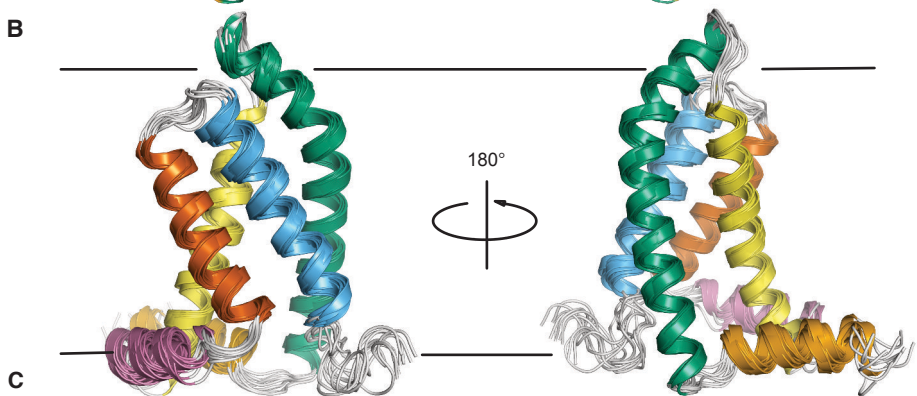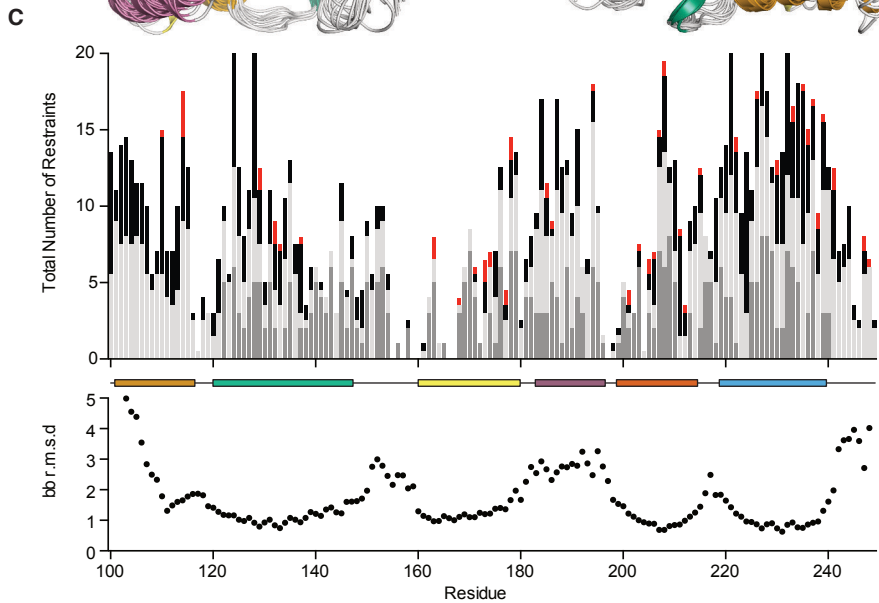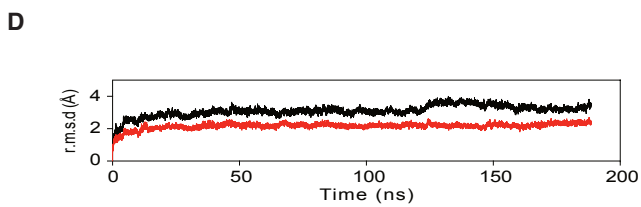

Supplement: supp [file elife_poa_e53901_Figure_2_figure_supplement_1.pdf › elife_poa_e53901_Figure_2_figure_supplement_1.pdf]

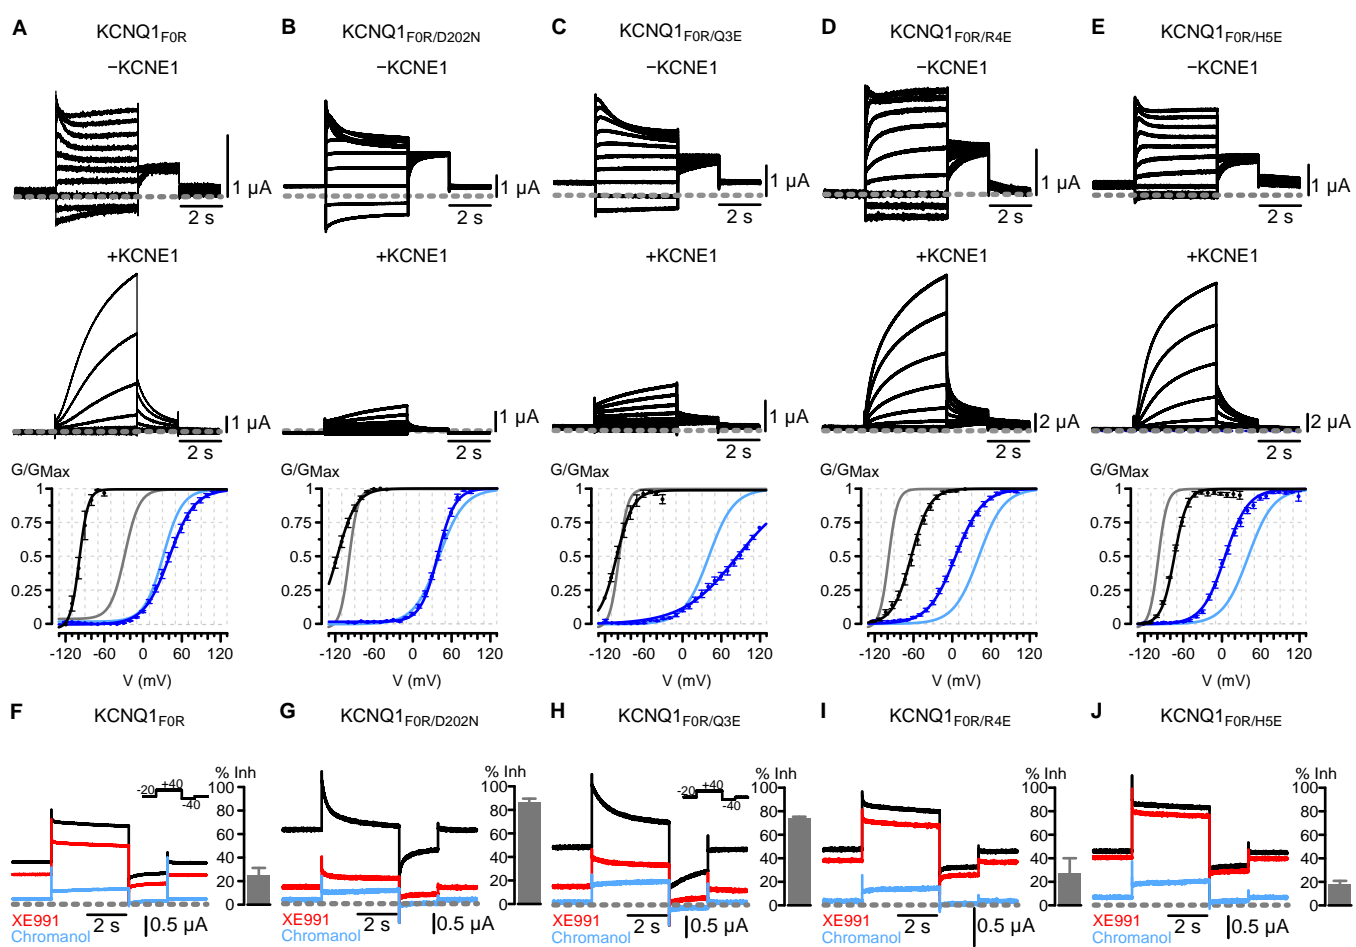

Supplement: supp [file elife_poa_e53901_Figure_5_figure_supplement_1.pdf › elife_poa_e53901_Figure_5_figure_supplement_1.pdf]
